# Supplementary material for: Global Prevalence and Risk Factors of Gastro-oesophageal Reflux Disease (GORD): Systematic Review with Meta-analysis
Source: Springer Nature journal article supplement (doi:10.1038/s41598-020-62795-1), 2020-04-02
Supplement: 41598_2020_62795_MOESM1_ESM.pdf [file 41598_2020_62795_MOESM1_ESM.pdf]

# **Global Prevalence and Risk Factors of Gastro-oesophageal Reflux Disease (GORD): Systematic Review with Meta-analysis**

Jorabar Singh Nirwan, Syed Shahzad Hasan, Zaheer-Ud-Din Babar,  
Barbara R. Conway, Muhammad Usman Ghori \*

*Department of Pharmacy, School of Applied Sciences, University of Huddersfield, Huddersfield, UK HD1 3DH.*

## **\*Corresponding author:**

Dr Muhammad Usman Ghori

**Email:** [m.ghori@hud.ac.uk](mailto:m.ghori@hud.ac.uk)

**Phone:** +44 (0) 1484 473295

**Fax:** +44 (0) 1484 472182

**Table S1.** Quality of studies assessment using Newcastle-Ottawa Quality Assessment Scale.

| Reference             | Country    | Quality of studies |            |            |            |
|-----------------------|------------|--------------------|------------|------------|------------|
|                       |            | Selection          |            |            | Outcome    |
|                       |            | Question 1         | Question 2 | Question 3 | Question 1 |
| <b>East Asia</b>      |            |                    |            |            |            |
| Cai 2015              | China      | *                  | *          | *          | *          |
| Chen 2005             | China      | *                  | *          | *          | *          |
| Cheung 2007           | China      | *                  | *          | *          | *          |
| Guozong 2000          | China      | *                  | *          |            | **         |
| He 2010               | China      | *                  | *          | *          | *          |
| Hu 2002               | China      | *                  | *          | *          | *          |
| Ma 2009               | China      | *                  | *          | *          | *          |
| Tan 2016              | China      | *                  | *          | *          | *          |
| Wong 2003             | China      | *                  | *          | *          | *          |
| Zou 2011              | China      | *                  | *          | *          | *          |
| Fujiwara 2005         | Japan      | *                  | *          | *          | *          |
| Kaji 2010             | Japan      | *                  | *          |            | *          |
| Kusano 2008           | Japan      | *                  | *          |            | **         |
| Murao 2011            | Japan      | *                  | *          |            | **         |
| Murase 2014           | Japan      | *                  | *          |            | *          |
| Niigaki 2013          | Japan      | *                  | *          | *          | **         |
| Stanghellini 1999     | Japan      | *                  | *          |            | *          |
| Jeong 2008            | Korea      | *                  | *          | *          | *          |
| Kang 2007             | Korea      | *                  | *          |            | *          |
| Kim 2007              | Korea      | *                  | *          | *          | **         |
| Lee 2001              | Korea      | *                  | *          |            | **         |
| Lee 2009              | Korea      | *                  | *          |            | *          |
| Min 2014              | Korea      | *                  | *          |            | *          |
| Yang 2008             | Korea      | *                  | *          |            | *          |
| Hung 2011             | Taiwan     | *                  | *          |            | *          |
| <b>Southeast Asia</b> |            |                    |            |            |            |
| Abdullah 2016         | Indonesia  | *                  | *          |            | *          |
| <b>South Asia</b>     |            |                    |            |            |            |
| Shaha 2012            | Bangladesh | *                  | *          |            | *          |
| Bhatia 2011           | India      | *                  | *          |            | *          |
| Kumar 2014            | India      | *                  | *          |            | *          |
| Wang 2016             | India      | *                  | *          | *          | *          |
| <b>West Asia</b>      |            |                    |            |            |            |
| Aletaha 2007          | Iran       | *                  | *          | *          | *          |
| Darvishmoghadam 2016  | Iran       | *                  | *          |            | *          |
| Ehsani 2007           | Iran       | *                  | *          |            | *          |
| Islami 2014           | Iran       | *                  | *          | *          | *          |
| Khodamoradi 2017      | Iran       | *                  | *          | *          | *          |

|                          |              |   |   |   |   |
|--------------------------|--------------|---|---|---|---|
| Mansour-Ghanaei 2013     | Iran         | * | * |   | * |
| Mostaghni 2009           | Iran         | * | * | * | * |
| Nasseri-Moghaddam 2008   | Iran         | * | * | * | * |
| Nourai 2007              | Iran         | * | * | * | * |
| Nourai 2007              | Iran         | * | * | * | * |
| Pourhoseingholi 2012     | Iran         | * | * | * | * |
| Rogha 2006               | Iran         | * | * |   | * |
| Saberi-Firoozi 2007      | Iran         | * | * | * | * |
| Solhpour 2008            | Iran         |   |   |   |   |
| Vossoughinia 2014        | Iran         | * | * | * | * |
| Yadegarfar 2018          | Iran         | * | * |   | * |
| Bor 2017                 | Turkey       | * | * |   | * |
| Kitapcioglu 2007         | Turkey       | * | * | * | * |
| Mungan 2012              | Turkey       | * | * |   | * |
| Yonem 2013               | Turkey       | * | * |   | * |
| Moshkowitz 2011          | Israel       | * | * |   | * |
| Sperber 2007             | Israel       | * | * | * | * |
| Almadi 2014              | Saudi Arabia | * | * |   | * |
| Alsuwat 2018             | Saudi Arabia | * | * |   | * |
| <b>Eastern Europe</b>    |              |   |   |   |   |
| Ziolkowski 2012          | Poland       | * | * | * | * |
| Chirila 2016             | Romania      | * | * | * | * |
| Bor 2016                 | Russia       | * | * |   | * |
| Lazebnik 2009            | Russia       | * | * | * | * |
| <b>Southern Europe</b>   |              |   |   |   |   |
| Cela 2013                | Albania      | * | * | * | * |
| Stanghellini 1999        | Italy        | * | * |   | * |
| Zagari 2008              | Italy        | * | * | * | * |
| Papatheodoridis 2005     | Greece       | * | * | * | * |
| Diaz-Rubio 2004          | Spain        | * | * | * | * |
| Ponce 2006               | Spain        | * | * |   | * |
| Rey 2009                 | Spain        | * | * |   | * |
| <b>Western Europe</b>    |              |   |   |   |   |
| Schwenkglens 2004        | Switzerland  | * | * | * | * |
| Stanghellini 1999        | Switzerland  | * | * |   | * |
| Stanghellini 1999        | Netherlands  | * | * |   | * |
| Bretagne 2006            | France       | * | * | * | * |
| Bruley Des Varannes 2006 | France       | * | * | * | * |
| Bollschweiler 2008       | Germany      | * | * | * | * |
| <b>Northern Europe</b>   |              |   |   |   |   |
| Djarv 2012               | Sweden       | * | * | * | * |
| Ronkainen 2005           | Sweden       | * | * | * | * |
| Terry 2000               | Sweden       | * | * |   | * |
| Wiklund 2006             | Sweden       | * | * | * | * |

|                                        |                                           |   |   |   |   |
|----------------------------------------|-------------------------------------------|---|---|---|---|
| Stanghellini 1999                      | Nordic (Denmark, Finland, Norway, Sweden) | * | * |   | * |
| Isolauri 1995                          | Finland                                   | * | * | * | * |
| Ness-Jensen 2011                       | Norway                                    | * | * |   | * |
| Mohammad 2003                          | UK                                        | * | * | * | * |
| Mohammed 2005                          | UK                                        | * | * | * | * |
| Murray 2003                            | UK                                        | * | * |   | * |
| Penston 1996                           | UK                                        | * |   |   | * |
| Rasmussen 2015                         | Denmark                                   | * | * | * | * |
| <b>North America</b>                   |                                           |   |   |   |   |
| Crews 2016                             | USA                                       | * | * |   | * |
| Dean 2010                              | USA                                       | * | * |   | * |
| Farup 2001                             | USA                                       | * | * | * | * |
| Jung 2007                              | USA                                       | * | * | * | * |
| Locke 1997                             | USA                                       | * | * | * | * |
| Locke 1999                             | USA                                       | * | * | * | * |
| Stanghellini 1999                      | USA                                       | * |   |   | * |
| Yuen 2010                              | USA                                       | * | * |   | * |
| Stanghellini 1999                      | Canada                                    | * | * |   | * |
| <b>Latin America and the Caribbean</b> |                                           |   |   |   |   |
| Chiocca 2005                           | Argentina                                 | * | * | * | * |
| Oliveira 2005                          | Brazil                                    | * | * | * | * |
| Dacoll 2012                            | Uruguay                                   | * | * |   | * |
| Paramo-Hernandez 2016                  | Colombia                                  | * | * | * | * |
| <b>Oceania</b>                         |                                           |   |   |   |   |
| Eslick 2009                            | Australia                                 | * | * | * | * |
| Pandeya 2012                           | Australia                                 | * | * | * | * |
| Talley 1998                            | Australia                                 | * | * | * | * |
| Haque 2000                             | New Zealand                               | * | * | * | * |
| <b>Africa</b>                          |                                           |   |   |   |   |
| Nwokediuko 2009                        | Nigeria                                   | * | * |   | * |
| Lohoues-Kouacou 2013                   | Côte d'Ivoire                             | * | * | * | * |

**Table S2.** Details of studies included in this systematic review.

| Reference        | Country | Sample size | Prevalence of GORD |       | Method of data collection (instrument)          | GORD criteria                                            | Duration of symptoms | Risk factors assessed                                                                        |
|------------------|---------|-------------|--------------------|-------|-------------------------------------------------|----------------------------------------------------------|----------------------|----------------------------------------------------------------------------------------------|
|                  |         |             | n <sup>a</sup>     | %     |                                                 |                                                          |                      |                                                                                              |
| <b>East Asia</b> |         |             |                    |       |                                                 |                                                          |                      |                                                                                              |
| Cai 2015         | China   | 2950        | 141                | 4.78  | Self-completed questionnaire (GerdQ)            | GerdQ score at least 8                                   | Previous 1 week      | Gender                                                                                       |
| Chen 2005        | China   | 3338        | 83                 | 2.49  | Face-to-face interviews (RDQ)                   | RDQ score at least 12                                    | Previous 1 month     | Age, BMI, education, gender, marriage status, area of living                                 |
| Cheung 2007      | China   | 1649        | 79                 | 4.79  | Telephone interview (BDQ)                       | Heartburn and/or acid regurgitation at least once a week | N/A                  | N/A                                                                                          |
| Guozong 2000     | China   | 4992        | 288                | 5.77  | Endoscopy and self-completed questionnaire      | Endoscopically proven esophagitis                        | Previous 12 months   | N/A                                                                                          |
| He 2010          | China   | 16078       | 496                | 3.08  | Self-completed questionnaire                    | Montreal definition                                      | Previous 1 month     | Age, alcohol, BMI, education, gender, income level, area of living, smoking                  |
| Hu 2002          | China   | 1649        | 79                 | 4.79  | Telephone interview (BDQ)                       | Heartburn and/or acid regurgitation at least once a week | N/A                  | Gender                                                                                       |
| Ma 2009          | China   | 919         | 57                 | 6.20  | Self-completed questionnaire (RDQ)              | Heartburn and/or acid regurgitation at least once a week | Previous 1 week      | Age, alcohol, BMI, education, gender, income level, marriage status, area of living, smoking |
| Tan 2016         | China   | 2074        | 79                 | 3.81  | Telephone interview                             | Montreal definition                                      | N/A                  | N/A                                                                                          |
| Wong 2003        | China   | 2209        | 55                 | 2.49  | Telephone interview (Mayo Reflux Questionnaire) | Heartburn and/or acid regurgitation at least once a week | Previous 12 months   | Gender                                                                                       |
| Zou 2011         | China   | 1029        | 48                 | 4.66  | Self-completed questionnaire (RDQ)              | Montreal definition                                      | Previous 1 month     | N/A                                                                                          |
| Fujiwara 2005    | Japan   | 6035        | 399                | 6.61  | Self-completed questionnaire                    | Heartburn and/or acid regurgitation at least once a week | Previous 12 months   | Age, gender                                                                                  |
| Kaji 2010        | Japan   | 2680        | 207                | 7.72  | Self-completed questionnaire                    | Heartburn and/or acid regurgitation at least once a week | Previous 3 months    | N/A                                                                                          |
| Kusano 2008      | Japan   | 2426        | 644                | 26.55 | Face-to-face interviews and endoscopy           | Heartburn and/or acid regurgitation at least once        | N/A                  | N/A                                                                                          |

|                       |           |       |      |       |                                                     |                                                                                                                      |                                  |                                                                      |  |
|-----------------------|-----------|-------|------|-------|-----------------------------------------------------|----------------------------------------------------------------------------------------------------------------------|----------------------------------|----------------------------------------------------------------------|--|
|                       |           |       |      |       |                                                     |                                                                                                                      | a week and/or reflux esophagitis |                                                                      |  |
| Murao 2011            | Japan     | 2853  | 667  | 23.38 | Endoscopy and face-to-face interviews (QUEST)       | Endoscopically proven esophagitis and/or QUEST score at least 6                                                      | N/A                              | Alcohol, diet, gender, smoking                                       |  |
| Murase 2014           | Japan     | 9643  | 2210 | 22.92 | Self-completed questionnaire (FSSG)                 | FSSG score at least 8 and/or currently undergoing treatment for GORD                                                 | N/A                              | Gender                                                               |  |
| Niigaki 2013          | Japan     | 3775  | 604  | 16.00 | Endoscopy and self-completed questionnaire (QUEST)  | Endoscopically proven esophagitis and/or QUEST score at least 6 and/or those currently undergoing treatment for GORD | N/A                              | Gender                                                               |  |
| Stanghellini 1999     | Japan     | 500   | 18   | 3.60  | Face-to-face interviews (DIGEST questionnaire)      | Heartburn and/or acid regurgitation at least once a week                                                             | Previous 3 months                | N/A                                                                  |  |
| Jeong 2008            | Korea     | 1417  | 50   | 3.53  | Face-to-face interviews (BDQ)                       | Heartburn and/or acid regurgitation at least once a week                                                             | N/A                              | Age                                                                  |  |
| Kang 2007             | Korea     | 2442  | 200  | 8.19  | Self-completed questionnaire                        | Heartburn and/or acid regurgitation at least once a week                                                             | Previous 12 months               | Alcohol, diet, gender, smoking                                       |  |
| Kim 2007              | Korea     | 25536 | 1161 | 4.55  | Face-to-face interviews (Mayo Reflux Questionnaire) | Heartburn and/or acid regurgitation at least once a week                                                             | N/A                              | N/A                                                                  |  |
| Lee 2001              | Korea     | 7015  | 242  | 3.45  | Endoscopy and interview-administered questionnaire  | Endoscopically proven esophagitis                                                                                    | N/A                              | Age, alcohol, smoking                                                |  |
| Lee 2009              | Korea     | 1443  | 123  | 8.52  | Self-completed questionnaire                        | Heartburn and/or acid regurgitation at least once a week                                                             | Previous 12 months               | N/A                                                                  |  |
| Min 2014              | Korea     | 5000  | 356  | 7.12  | Telephone interview                                 | Montreal definition                                                                                                  | Previous 3 months                | Alcohol, education, gender, marriage status, smoking                 |  |
| Yang 2008             | Korea     | 1044  | 74   | 7.09  | Telephone interview                                 | Heartburn and/or acid regurgitation at least once a week                                                             | Previous 12 months               | N/A                                                                  |  |
| Hung 2011             | Taiwan    | 1238  | 310  | 25.04 | Self-completed questionnaire (GerdQ)                | GerdQ score at least 12                                                                                              | N/A                              | Age, alcohol, BMI, gender, smoking                                   |  |
| <b>Southeast Asia</b> |           |       |      |       |                                                     |                                                                                                                      |                                  |                                                                      |  |
| Abdullah 2016         | Indonesia | 278   | 26   | 9.35  | Self-completed questionnaire (GerdQ)                | GerdQ score at least 7                                                                                               | Previous 1 week                  | BMI, diet, education, gender, income level, marriage status, smoking |  |
| <b>South Asia</b>     |           |       |      |       |                                                     |                                                                                                                      |                                  |                                                                      |  |

|                        |            |       |      |       |                                                          |                                                          |                    |                                                                       |
|------------------------|------------|-------|------|-------|----------------------------------------------------------|----------------------------------------------------------|--------------------|-----------------------------------------------------------------------|
| Shaha 2012             | Bangladesh | 2000  | 110  | 5.50  | Interview-administered questionnaire                     | Heartburn and/or acid regurgitation at least once a week | Previous 12 months | Age, BMI, education, gender, area of living, smoking                  |
| Bhatia 2011            | India      | 3224  | 245  | 7.60  | Postal questionnaire                                     | Heartburn and/or acid regurgitation at least once a week | N/A                | Alcohol, diet, gender, smoking                                        |
| Kumar 2014             | India      | 2000  | 472  | 23.60 | Face-to-face interviews                                  | Heartburn and/or acid regurgitation at least once a week | N/A                | N/A                                                                   |
| Wang 2016              | India      | 1072  | 238  | 22.20 | Interview-administered questionnaire (GerdQ)             | GerdQ score at least 8                                   | N/A                | Age, BMI, education, gender, area of living, smoking                  |
| <b>West Asia</b>       |            |       |      |       |                                                          |                                                          |                    |                                                                       |
| Aletaha 2007           | Iran       | 1000  | 123  | 12.30 | Face-to-face interviews (GHQ 28)                         | Heartburn and/or acid regurgitation at least once a week | Previous 12 months | N/A                                                                   |
| Darvishmoghadam 2016   | Iran       | 2265  | 635  | 28.04 | Face-to-face interviews (Mayo Reflux Questionnaire)      | Heartburn and/or acid regurgitation at least once a week | Previous 12 months | Alcohol, BMI, diet, education, gender                                 |
| Ehsani 2007            | Iran       | 700   | 132  | 18.86 | Face-to-face interviews                                  | Heartburn and/or acid regurgitation at least once a week | N/A                | N/A                                                                   |
| Islami 2014            | Iran       | 50001 | 9944 | 19.89 | Face-to-face interviews                                  | Montreal definition                                      | Previous 12 months | N/A                                                                   |
| Khodamoradi 2017       | Iran       | 9264  | 2325 | 25.10 | Face-to-face interviews                                  | Heartburn and/or acid regurgitation at least once a week | Previous 12 months | Gender                                                                |
| Mansour-Ghanaei 2013   | Iran       | 1473  | 134  | 9.10  | Telephone interview (GerdQ)                              | GerdQ score at least 8                                   | Previous 1 week    | Age, BMI, diet, gender, NSAIDs/aspirin use, smoking                   |
| Mostaghni 2009         | Iran       | 717   | 237  | 33.05 | Face-to-face interviews                                  | Heartburn and/or acid regurgitation at least once a week | Previous 12 months | Diet, gender, marriage status, NSAIDs/aspirin use, smoking            |
| Nasseri-Moghaddam 2008 | Iran       | 2057  | 374  | 18.18 | Self-completed questionnaire (Mayo Reflux Questionnaire) | Heartburn and/or acid regurgitation at least once a week | Previous 12 months | Diet, education, gender, marriage status, NSAIDs/aspirin use, smoking |
| Nourai 2007            | Iran       | 1202  | 105  | 8.74  | Telephone interview                                      | Heartburn and/or acid regurgitation at least once a week | N/A                | N/A                                                                   |
| Nourai 2007            | Iran       | 2561  | 542  | 21.16 | Face-to-face interviews                                  | Heartburn and/or acid regurgitation at least once a week | Previous 6 months  | Age, education, gender, area of living, smoking                       |

|                       |              |       |      |       |                                                                  |                                                                   |                    |                                                                       |
|-----------------------|--------------|-------|------|-------|------------------------------------------------------------------|-------------------------------------------------------------------|--------------------|-----------------------------------------------------------------------|
| Pourhoseingholi 2012  | Iran         | 18180 | 1610 | 8.86  | Face-to-face interviews (Mayo Reflux Questionnaire)              | Heartburn and/or acid regurgitation at least once a week          | Previous 6 months  | Age, education, gender, marriage status                               |
| Rogha 2006            | Iran         | 2400  | 600  | 25.00 | Face-to-face interviews                                          | Heartburn and/or acid regurgitation at least once a week          | Previous 12 months | N/A                                                                   |
| Saberi-Firoozi 2007   | Iran         | 1978  | 304  | 15.37 | Interview-administered questionnaire                             | Heartburn and/or acid regurgitation at least once a week          | Previous 12 months | Education, area of living                                             |
| Solhpour 2008         | Iran         | 5733  | 522  | 9.11  | Face-to-face interviews (Mayo Reflux Questionnaire)              | Heartburn and/or acid regurgitation at least once a week          | Previous 3 months  | Gender                                                                |
| Vossoughinia 2014     | Iran         | 1634  | 420  | 25.70 | Postal questionnaire (Mayo Reflux Questionnaire)                 | Heartburn and/or acid regurgitation at least once a week          | Previous 12 months | N/A                                                                   |
| Yadegarfar 2018       | Iran         | 1130  | 316  | 27.96 | Face-to-face interviews (FSSG)                                   | FSSG score > 10                                                   | N/A                | N/A                                                                   |
| Bor 2017              | Turkey       | 3214  | 733  | 22.81 | Face-to-face interviews (Mayo Reflux Questionnaire)              | Heartburn and/or acid regurgitation at least once a week          | N/A                | Alcohol, BMI, gender, marriage status                                 |
| Kitapcioglu 2007      | Turkey       | 630   | 126  | 20.00 | Face-to-face interviews (Mayo Reflux Questionnaire)              | Heartburn and/or acid regurgitation at least once a week          | Previous 12 months | NSAIDs/aspirin use                                                    |
| Mungan 2012           | Turkey       | 8143  | 2238 | 27.48 | Face-to-face interviews (GerdQ)                                  | GerdQ score at least 8 and/or previously diagnosed by a physician | Previous 1 week    | Age, gender                                                           |
| Yonem 2013            | Turkey       | 1345  | 259  | 19.26 | Face-to-face interviews                                          | Montreal definition                                               | Previous 12 months | Age, alcohol, diet, gender, income level, NSAIDs/aspirin use, smoking |
| Moshkowitz 2011       | Israel       | 2027  | 252  | 12.43 | Telephone interview                                              | Heartburn and/or acid regurgitation at least once a week          | N/A                | Age, education, gender, income level                                  |
| Sperber 2007          | Israel       | 981   | 91   | 9.28  | Telephone interview (RDQ)                                        | Heartburn and/or acid regurgitation at least once a week          | Previous 12 months | N/A                                                                   |
| Almadi 2014           | Saudi Arabia | 1265  | 574  | 45.38 | Face-to-face interviews (GerdQ)                                  | GerdQ score at least 8                                            | N/A                | Gender, smoking                                                       |
| Alsuwat 2018          | Saudi Arabia | 2043  | 587  | 28.73 | Self-completed questionnaire and face-to-face interviews (GerdQ) | GerdQ score at least 8                                            | N/A                | Education, gender, marriage status, area of living                    |
| <b>Eastern Europe</b> |              |       |      |       |                                                                  |                                                                   |                    |                                                                       |
| Ziolkowski 2012       | Poland       | 850   | 302  | 35.53 | Face-to-face interviews                                          | Heartburn and/or acid regurgitation at least once a week          | N/A                | Gender                                                                |
| Chirila 2016          | Romania      | 184   | 57   | 30.98 | Interview-administered questionnaire                             | Montreal definition                                               | N/A                | Alcohol, BMI, diet, gender, smoking                                   |



|                        |             |      |      |       |                                                                  |                                                          |                    |                                                                                     |
|------------------------|-------------|------|------|-------|------------------------------------------------------------------|----------------------------------------------------------|--------------------|-------------------------------------------------------------------------------------|
| Bor 2016               | Russia      | 1065 | 251  | 23.57 | Face-to-face interviews (Mayo Reflux Questionnaire)              | Heartburn and/or acid regurgitation at least once a week | Previous 12 months | Alcohol, BMI, diet, education, gender, marriage status, NSAIDs/aspirin use, smoking |
| Lazebnik 2009          | Russia      | 7812 | 1039 | 13.30 | Telephone interview (Mayo Reflux Questionnaire)                  | Heartburn and/or acid regurgitation at least once a week | Previous 12 months | Age, alcohol, gender, NSAIDs/aspirin use, smoking                                   |
| <b>Southern Europe</b> |             |      |      |       |                                                                  |                                                          |                    |                                                                                     |
| Cela 2013              | Albania     | 845  | 101  | 11.95 | Interview-administered questionnaire (Montreal instrument)       | Montreal definition                                      | Previous 12 months | Alcohol, BMI, diet, education, gender, income level, smoking                        |
| Stanghellini 1999      | Italy       | 999  | 59   | 5.91  | Face-to-face interviews (DIGEST questionnaire)                   | Heartburn and/or acid regurgitation at least once a week | Previous 3 months  | N/A                                                                                 |
| Zagari 2008            | Italy       | 1033 | 245  | 23.72 | Interview-administered questionnaire                             | Heartburn and/or acid regurgitation at least once a week | Previous 12 months | Age, alcohol, BMI, diet, gender, NSAIDs/aspirin use, smoking                        |
| Papatheodoridis 2005   | Greece      | 700  | 241  | 34.43 | Face-to-face interviews (GSRs)                                   | Heartburn and/or acid regurgitation at least once a week | Previous 1 week    | N/A                                                                                 |
| Diaz-Rubio 2004        | Spain       | 2500 | 245  | 9.80  | Telephone interview (Mayo Reflux Questionnaire)                  | Heartburn and/or acid regurgitation at least once a week | Previous 12 months | Age, education, gender, area of living                                              |
| Ponce 2006             | Spain       | 2156 | 335  | 15.54 | Postal questionnaire                                             | Heartburn and/or acid regurgitation at least once a week | Previous 1 month   | N/A                                                                                 |
| Rey 2009               | Spain       | 709  | 60   | 8.46  | Interview-administered questionnaire (Mayo Reflux Questionnaire) | Heartburn and/or acid regurgitation at least once a week | Previous 12 months | N/A                                                                                 |
| <b>Western Europe</b>  |             |      |      |       |                                                                  |                                                          |                    |                                                                                     |
| Schwenkglens 2004      | Switzerland | 7222 | 1274 | 17.64 | Telephone interview                                              | Heartburn and/or acid regurgitation at least once a week | N/A                | Age, BMI, gender, smoking                                                           |
| Stanghellini 1999      | Switzerland | 514  | 25   | 4.86  | Face-to-face interviews (DIGEST questionnaire)                   | Heartburn and/or acid regurgitation at least once a week | Previous 3 months  | N/A                                                                                 |
| Stanghellini 1999      | Netherlands | 502  | 25   | 4.98  | Face-to-face interviews (DIGEST questionnaire)                   | Heartburn and/or acid regurgitation at least once a week | Previous 3 months  | N/A                                                                                 |
| Bretagne 2006          | France      | 5395 | 419  | 7.77  | Postal questionnaire                                             | Heartburn and/or acid regurgitation at least once a week | N/A                | N/A                                                                                 |

|                          |                                           |       |      |       |                                                          |                                                                       |                    |             |
|--------------------------|-------------------------------------------|-------|------|-------|----------------------------------------------------------|-----------------------------------------------------------------------|--------------------|-------------|
| Bruley Des Varannes 2006 | France                                    | 40982 | 2787 | 6.80  | Face-to-face interviews                                  | Heartburn and/or acid regurgitation at least once a week              | N/A                | N/A         |
| Bollschweiler 2008       | Germany                                   | 268   | 23   | 8.58  | Postal questionnaire                                     | Heartburn and/or acid regurgitation at least once a week              | N/A                | N/A         |
| <b>Northern Europe</b>   |                                           |       |      |       |                                                          |                                                                       |                    |             |
| Djarv 2012               | Sweden                                    | 4910  | 472  | 9.61  | Postal questionnaire                                     | Heartburn and/or acid regurgitation at least once a week              | N/A                | N/A         |
| Ronkainen 2005           | Sweden                                    | 1000  | 259  | 25.90 | Telephone interview and postal questionnaire (QUEST)     | Heartburn and/or acid regurgitation at least once a week              | Previous 3 months  | Gender      |
| Terry 2000               | Sweden                                    | 815   | 135  | 16.56 | Face-to-face interviews                                  | Heartburn and/or acid regurgitation at least once a week              | Previous 12 months | N/A         |
| Wiklund 2006             | Sweden                                    | 1395  | 216  | 15.48 | Postal questionnaire (GSRs and SSA-P)                    | Heartburn and/or acid regurgitation at least once a week              | Previous 1 week    | N/A         |
| Stanghellini 1999        | Nordic (Denmark, Finland, Norway, Sweden) | 1010  | 67   | 6.63  | Face-to-face interviews (DIGEST questionnaire)           | Heartburn and/or acid regurgitation at least once a week              | Previous 3 months  | N/A         |
| Isolauri 1995            | Finland                                   | 1700  | 175  | 10.29 | Postal questionnaire                                     | Heartburn and/or acid regurgitation at least once a week              | Previous 1 week    | N/A         |
| Ness-Jensen 2011         | Norway                                    | 44997 | 7692 | 17.09 | Postal questionnaire                                     | Heartburn and/or acid regurgitation at least once a week              | Previous 12 months | Gender      |
| Mohammad 2003            | UK                                        | 3920  | 706  | 18.01 | Postal questionnaire                                     | Heartburn and/or acid regurgitation at least once a week              | Previous 12 months | N/A         |
| Mohammed 2005            | UK                                        | 1533  | 322  | 21.00 | Postal questionnaire                                     | Heartburn and/or acid regurgitation at least once a week              | Previous 12 months | N/A         |
| Murray 2003              | UK                                        | 4902  | 783  | 15.97 | Self-completed questionnaire                             | Heartburn and/or acid regurgitation at least once a week              | Previous 3 months  | N/A         |
| Penston 1996             | UK                                        | 2112  | 131  | 6.20  | Interview-administered questionnaire                     | Heartburn and/or acid regurgitation at least once a week              | Previous 12 months | N/A         |
| Rasmussen 2015           | Denmark                                   | 48027 | 5387 | 11.22 | Self-completed questionnaire and telephone interview     | Montreal definition                                                   | N/A                | Age, gender |
| <b>North America</b>     |                                           |       |      |       |                                                          |                                                                       |                    |             |
| Crews 2016               | USA                                       | 205   | 68   | 33.17 | Self-completed questionnaire (Mayo Reflux Questionnaire) | Heartburn and/or acid regurgitation at least once a week and/or those | Previous 12 months | N/A         |

|                                        |           |      |      |       |                                                  |                                                          |                    |                                                                         |
|----------------------------------------|-----------|------|------|-------|--------------------------------------------------|----------------------------------------------------------|--------------------|-------------------------------------------------------------------------|
|                                        |           |      |      |       |                                                  | currently undergoing treatment for GORD                  |                    |                                                                         |
| Dean 2010                              | USA       | 2603 | 701  | 26.93 | Self-completed questionnaire (GERD-SMQ)          | GERD SMQ score higher than 9                             | Previous 3 months  | N/A                                                                     |
| Farup 2001                             | USA       | 9181 | 1284 | 13.99 | Telephone interview                              | Heartburn and/or acid regurgitation at least once a week | Previous 3 months  | Age, gender                                                             |
| Jung 2007                              | USA       | 2273 | 411  | 18.08 | Postal questionnaire (BDQ)                       | Heartburn and/or acid regurgitation at least once a week | Previous 12 months | Alcohol, education, gender, marriage status, smoking                    |
| Locke 1997                             | USA       | 1511 | 299  | 19.79 | Postal questionnaire (Mayo Reflux Questionnaire) | Heartburn and/or acid regurgitation at least once a week | Previous 12 months | N/A                                                                     |
| Locke 1999                             | USA       | 1524 | 304  | 19.95 | Postal questionnaire (Mayo Reflux Questionnaire) | Heartburn and/or acid regurgitation at least once a week | Previous 12 months | Alcohol, diet, gender, smoking                                          |
| Stanghellini 1999                      | USA       | 1020 | 153  | 15.00 | Face-to-face interviews (DIGEST questionnaire)   | Heartburn and/or acid regurgitation at least once a week | Previous 3 months  | N/A                                                                     |
| Yuen 2010                              | USA       | 1172 | 307  | 26.19 | Self-completed questionnaire                     | Heartburn and/or acid regurgitation at least once a week | N/A                | N/A                                                                     |
| Stanghellini 1999                      | Canada    | 1036 | 96   | 9.27  | Face-to-face interviews (DIGEST questionnaire)   | Heartburn and/or acid regurgitation at least once a week | Previous 3 months  | N/A                                                                     |
| <b>Latin America and the Caribbean</b> |           |      |      |       |                                                  |                                                          |                    |                                                                         |
| Chiocca 2005                           | Argentina | 839  | 100  | 11.92 | Postal questionnaire (Mayo Reflux Questionnaire) | Heartburn and/or acid regurgitation at least once a week | N/A                | Gender                                                                  |
| Oliveira 2005                          | Brazil    | 3934 | 1231 | 31.29 | Face-to-face interviews                          | Heartburn and/or acid regurgitation at least once a week | N/A                | Age, alcohol, BMI, education, gender, marriage status, smoking          |
| Dacoll 2012                            | Uruguay   | 1141 | 54   | 4.73  | Self-completed questionnaire (GerdQ)             | GerdQ score at least 8                                   | N/A                | Education, gender                                                       |
| Paramo-Hernandez 2016                  | Colombia  | 6842 | 820  | 11.98 | Telephone interview (GerdQ)                      | GerdQ score at least 8                                   | N/A                | N/A                                                                     |
| <b>Oceania</b>                         |           |      |      |       |                                                  |                                                          |                    |                                                                         |
| Eslick 2009                            | Australia | 672  | 78   | 11.61 | Postal questionnaire (CPQ)                       | Heartburn and/or acid regurgitation at least once a week | Previous 12 months | N/A                                                                     |
| Pandeya 2012                           | Australia | 1580 | 175  | 11.08 | Postal questionnaire                             | Heartburn and/or acid regurgitation at least once a week | Previous 12 months | Age, alcohol, BMI, diet, education, gender, NSAIDs/aspirin use, smoking |

|                      |               |      |     |       |                                                  |                                                          |                    |                                                    |
|----------------------|---------------|------|-----|-------|--------------------------------------------------|----------------------------------------------------------|--------------------|----------------------------------------------------|
| Talley 1998          | Australia     | 730  | 128 | 17.53 | Postal questionnaire (BDQ)                       | Heartburn and/or acid regurgitation at least once a week | Previous 12 months | N/A                                                |
| Haque 2000           | New Zealand   | 778  | 122 | 15.68 | Postal questionnaire (Mayo Reflux Questionnaire) | Heartburn and/or acid regurgitation at least once a week | Previous 12 months | N/A                                                |
| <b>Africa</b>        |               |      |     |       |                                                  |                                                          |                    |                                                    |
| Nwokediuko 2009      | Nigeria       | 410  | 108 | 26.34 | Self-completed questionnaire (QUEST)             | Montreal definition and/or QUEST score at least 4        | N/A                | Alcohol, diet, gender, NSAIDs/aspirin use, smoking |
| Lohoues-Kouacou 2013 | Côte d'Ivoire | 1940 | 178 | 9.18  | Face-to-face interviews                          | Heartburn and/or acid regurgitation at least once a week | N/A                | N/A                                                |

N/A, information not available; GerdQ, gastroesophageal reflux disease questionnaire; RDQ, Reflux Disease Questionnaire; BDQ, Bowel Disease Questionnaire; FSSG, Frequency Scale for the Symptoms of GORD; GHQ-28, General Health Questionnaire-28; GSRS, Gastrointestinal Symptom Rating Scale; DIGEST, Domestic/International Gastroenterology Surveillance Study; SSA-P, Subjective Symptom Assessment Profile; GERD-SMQ, GERD Symptom and Medication Questionnaire; CPQ, Chest Pain Questionnaire; QUEST, Quality of life and Utility Evaluation Survey Technology.

<sup>a</sup> Number of subjects with GORD.

**Table S3.** Odds ratios of the risk factors for GORD.

| <b>Risk factor</b>     | <b>Compared to</b> | <b>Odds ratio</b> | <b>95% CI</b> | <b>Significance level</b> |
|------------------------|--------------------|-------------------|---------------|---------------------------|
| <b>Gender</b>          |                    |                   |               |                           |
| Females                | Males              | 1.179             | 1.154-1.204   | P < 0.0001                |
| <b>Age (years)</b>     |                    |                   |               |                           |
| 35-59                  | 18-34              | 1.168             | 1.105-1.235   | P < 0.0001                |
| ≥60                    | 18-34              | 1.200             | 1.123-1.282   | P < 0.0001                |
| ≥60                    | 35-59              | 1.027             | 0.977-1.080   | P= 0.2896                 |
| <b>Alcohol intake</b>  |                    |                   |               |                           |
| Moderate/High          | None/Low           | 1.072             | 1.022-1.124   | P= 0.0044                 |
| <b>BMI</b>             |                    |                   |               |                           |
| 18.5-29.9              | <18.5              | 4.737             | 3.888-5.773   | P < 0.0001                |
| ≥30                    | <18.5              | 5.350             | 4.383-6.529   | P < 0.0001                |
| ≥30                    | 18.5-29.9          | 1.725             | 1.576-1.889   | P < 0.0001                |
| <b>Education level</b> |                    |                   |               |                           |
| Low                    | Medium             | 2.114             | 1.991-2.246   | P < 0.0001                |
| Low                    | High               | 1.751             | 1.641-1.868   | P < 0.0001                |
| Medium                 | High               | 0.820             | 0.770-0.891   | P < 0.0001                |
| <b>Income level</b>    |                    |                   |               |                           |
| Low                    | Medium             | 1.291             | 1.133-1.471   | P= 0.0001                 |

|        |      |       |             |           |
|--------|------|-------|-------------|-----------|
| Low    | High | 1.057 | 0.881-1.267 | P= 0.5532 |
| Medium | High | 0.819 | 0.674-0.995 | P= 0.0440 |

**Marriage status**

|                            |         |       |             |            |
|----------------------------|---------|-------|-------------|------------|
| Married                    | Single  | 1.547 | 1.444-1.658 | P < 0.0001 |
| Divorced/separated/widowed | Single  | 3.466 | 3.052-3.937 | P < 0.0001 |
| Divorced/separated/widowed | Married | 2.240 | 1.994-2.518 | P < 0.0001 |

**NSAIDs/aspirin use**

|       |           |       |             |            |
|-------|-----------|-------|-------------|------------|
| Users | Non-users | 1.459 | 1.330-1.601 | P < 0.0001 |
|-------|-----------|-------|-------------|------------|

**Area of living**

|       |          |       |             |            |
|-------|----------|-------|-------------|------------|
| Urban | Rural    | 2.227 | 2.043-2.428 | P < 0.0001 |
| Rural | Suburban | 2.090 | 1.554-2.810 | P < 0.0001 |
| Urban | Suburban | 4.654 | 3.473-6.236 | P < 0.0001 |

**Smoking status**

|                 |             |       |             |           |
|-----------------|-------------|-------|-------------|-----------|
| Current smokers | Ex-smokers  | 0.884 | 0.739-1.059 | P= 0.1803 |
| Current smokers | Non-smokers | 1.041 | 0.998-1.086 | P= 0.0652 |
| Ex-smokers      | Non-smokers | 1.177 | 0.985-1.407 | P= 0.0732 |

**Diet**

**Spicy food**

|               |          |       |             |           |
|---------------|----------|-------|-------------|-----------|
| Moderate/high | Low/none | 1.260 | 1.058-1.500 | P= 0.0095 |
|---------------|----------|-------|-------------|-----------|

**Sweet food**

|               |          |       |             |           |
|---------------|----------|-------|-------------|-----------|
| Moderate/high | Low/none | 0.931 | 0.746-1.161 | P= 0.5253 |
|---------------|----------|-------|-------------|-----------|

|                          |          |       |             |            |
|--------------------------|----------|-------|-------------|------------|
| <b>Meat/fish</b>         |          |       |             |            |
| Moderate/high            | Low/none | 3.409 | 2.934-3.962 | P < 0.0001 |
| <b>Carbonated drinks</b> |          |       |             |            |
| Moderate/high            | Low/none | 1.287 | 1.139-1.455 | P= 0.0001  |
| <b>Fatty food</b>        |          |       |             |            |
| Moderate/high            | Low/none | 1.247 | 0.860-1.808 | P= 0.2437  |
| <b>Fried food</b>        |          |       |             |            |
| Moderate/high            | Low/none | 2.994 | 2.498-3.589 | P < 0.0001 |
| <b>Coffee/tea</b>        |          |       |             |            |
| Moderate/high            | Low/none | 1.469 | 1.361-1.585 | P < 0.0001 |

---

**Table S4.** Relative risks of the risk factors for GORD.

| <b>Risk factor</b>     | <b>Compared to</b> | <b>Relative risk</b> | <b>95% CI</b> | <b>Significance level</b> |
|------------------------|--------------------|----------------------|---------------|---------------------------|
| <b>Gender</b>          |                    |                      |               |                           |
| Females                | Males              | 1.149                | 1.128-1.170   | P < 0.0001                |
| <b>Age (years)</b>     |                    |                      |               |                           |
| 35-59                  | 18-34              | 1.146                | 1.091-1.204   | P < 0.0001                |
| ≥60                    | 18-34              | 1.173                | 1.107-1.243   | P < 0.0001                |
| ≥60                    | 35-59              | 1.024                | 0.981-1.069   | P= 0.2892                 |
| <b>Alcohol intake</b>  |                    |                      |               |                           |
| Moderate/High          | None/Low           | 1.063                | 1.019-1.109   | P= 0.0044                 |
| <b>BMI</b>             |                    |                      |               |                           |
| 18.5-29.9              | <18.5              | 4.070                | 3.374-4.909   | P < 0.0001                |
| ≥30                    | <18.5              | 6.216                | 5.137-7.523   | P < 0.0001                |
| ≥30                    | 18.5-29.9          | 1.527                | 1.426-1.636   | P < 0.0001                |
| <b>Education level</b> |                    |                      |               |                           |
| Low                    | Medium             | 1.952                | 1.849-2.061   | P < 0.0001                |
| Low                    | High               | 1.641                | 1.549-1.739   | P < 0.0001                |
| Medium                 | High               | 0.841                | 0.786-0.899   | P < 0.0001                |
| <b>Income level</b>    |                    |                      |               |                           |
| Low                    | Medium             | 1.273                | 1.125-1.441   | P= 0.0001                 |
| Low                    | High               | 1.053                | 0.887-1.250   | P= 0.5536                 |



|        |      |       |             |           |
|--------|------|-------|-------------|-----------|
| Medium | High | 0.827 | 0.688-0.995 | P= 0.0435 |
|--------|------|-------|-------------|-----------|

**Marriage status**

|                            |         |       |             |            |
|----------------------------|---------|-------|-------------|------------|
| Married                    | Single  | 1.468 | 1.380-1.561 | P < 0.0001 |
| Divorced/separated/widowed | Single  | 2.788 | 2.528-3.075 | P < 0.0001 |
| Divorced/separated/widowed | Married | 1.899 | 1.743-2.070 | P < 0.0001 |

**NSAIDs/aspirin use**

|       |           |       |             |            |
|-------|-----------|-------|-------------|------------|
| Users | Non-users | 1.364 | 1.266-1.470 | P < 0.0001 |
|-------|-----------|-------|-------------|------------|

**Area of living**

|       |          |       |             |            |
|-------|----------|-------|-------------|------------|
| Urban | Rural    | 2.050 | 1.896-2.217 | P < 0.0001 |
| Rural | Suburban | 2.013 | 1.514-2.678 | P < 0.0001 |
| Urban | Suburban | 4.128 | 3.115-5.470 | P < 0.0001 |

**Smoking status**

|                 |             |       |             |           |
|-----------------|-------------|-------|-------------|-----------|
| Current smokers | Ex-smokers  | 0.899 | 0.771-1.049 | P= 0.1769 |
| Current smokers | Non-smokers | 1.036 | 0.998-1.075 | P= 0.0650 |
| Ex-smokers      | Non-smokers | 1.151 | 0.989-1.341 | P= 0.0701 |

**Diet**

**Spicy food**

|               |          |       |             |           |
|---------------|----------|-------|-------------|-----------|
| Moderate/high | Low/none | 1.234 | 1.053-1.447 | P= 0.0095 |
|---------------|----------|-------|-------------|-----------|

**Sweet food**

|               |          |       |             |           |
|---------------|----------|-------|-------------|-----------|
| Moderate/high | Low/none | 0.950 | 0.813-1.111 | P= 0.5225 |
|---------------|----------|-------|-------------|-----------|

**Meat/fish**

|               |          |       |             |            |
|---------------|----------|-------|-------------|------------|
| Moderate/high | Low/none | 2.797 | 2.463-3.176 | P < 0.0001 |
|---------------|----------|-------|-------------|------------|

**Carbonated drinks**

|               |          |       |             |            |
|---------------|----------|-------|-------------|------------|
| Moderate/high | Low/none | 1.238 | 1.117-1.372 | P < 0.0001 |
|---------------|----------|-------|-------------|------------|

**Fatty food**

|               |          |       |             |           |
|---------------|----------|-------|-------------|-----------|
| Moderate/high | Low/none | 1.221 | 0.874-1.705 | P= 0.2411 |
|---------------|----------|-------|-------------|-----------|

**Fried food**

|               |          |       |             |            |
|---------------|----------|-------|-------------|------------|
| Moderate/high | Low/none | 2.614 | 2.227-3.069 | P < 0.0001 |
|---------------|----------|-------|-------------|------------|

**Coffee/tea**

|               |          |       |             |            |
|---------------|----------|-------|-------------|------------|
| Moderate/high | Low/none | 1.376 | 1.291-1.468 | P < 0.0001 |
|---------------|----------|-------|-------------|------------|

---

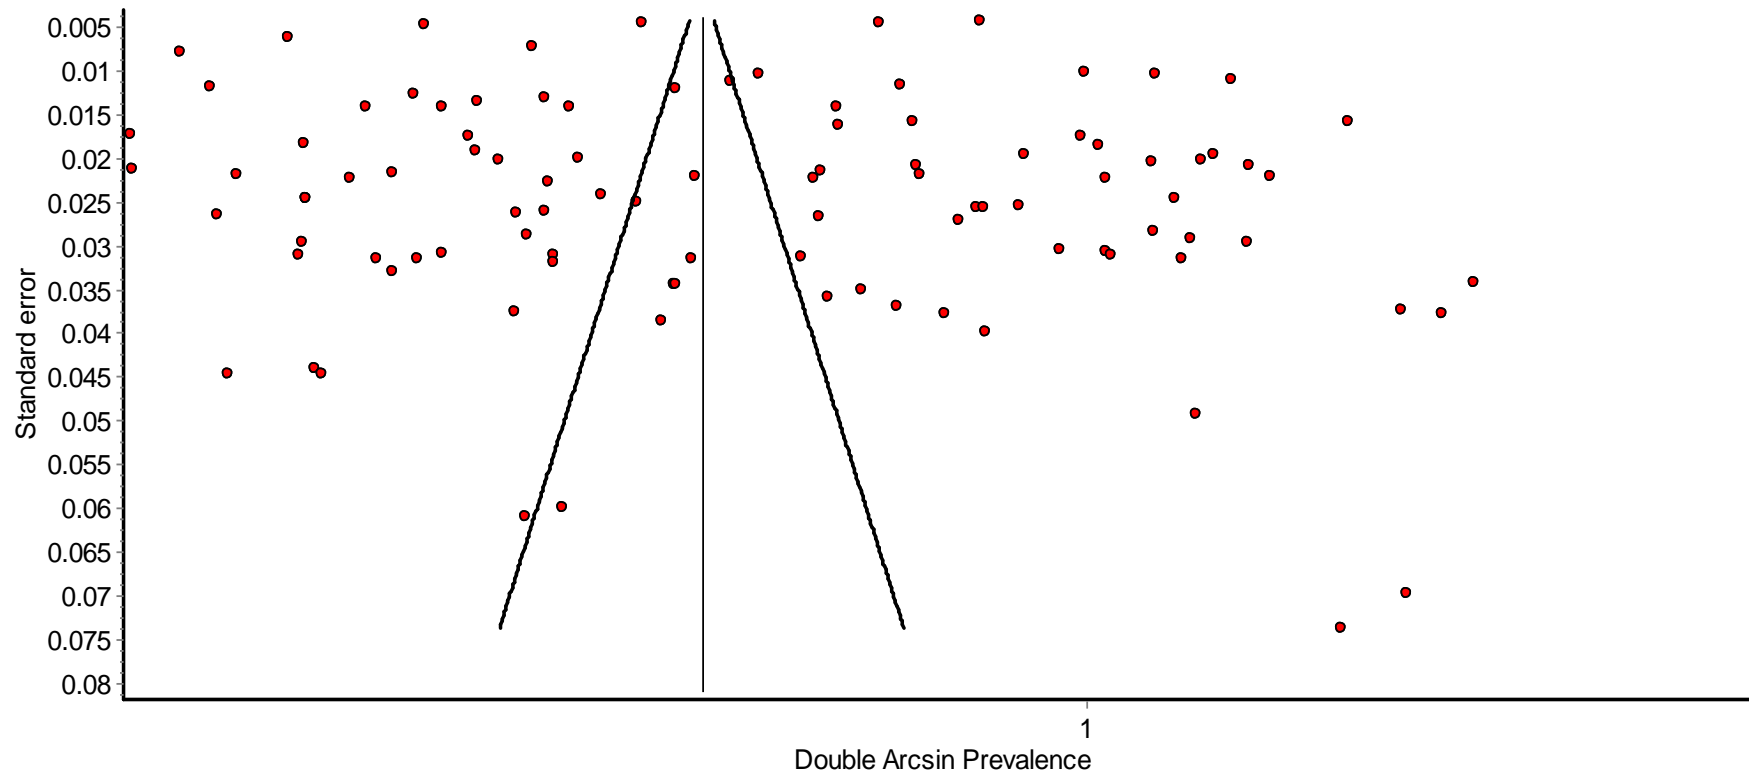

**Figure S1.** Funnel plot showing all studies included in the analysis for global prevalence of GORD.

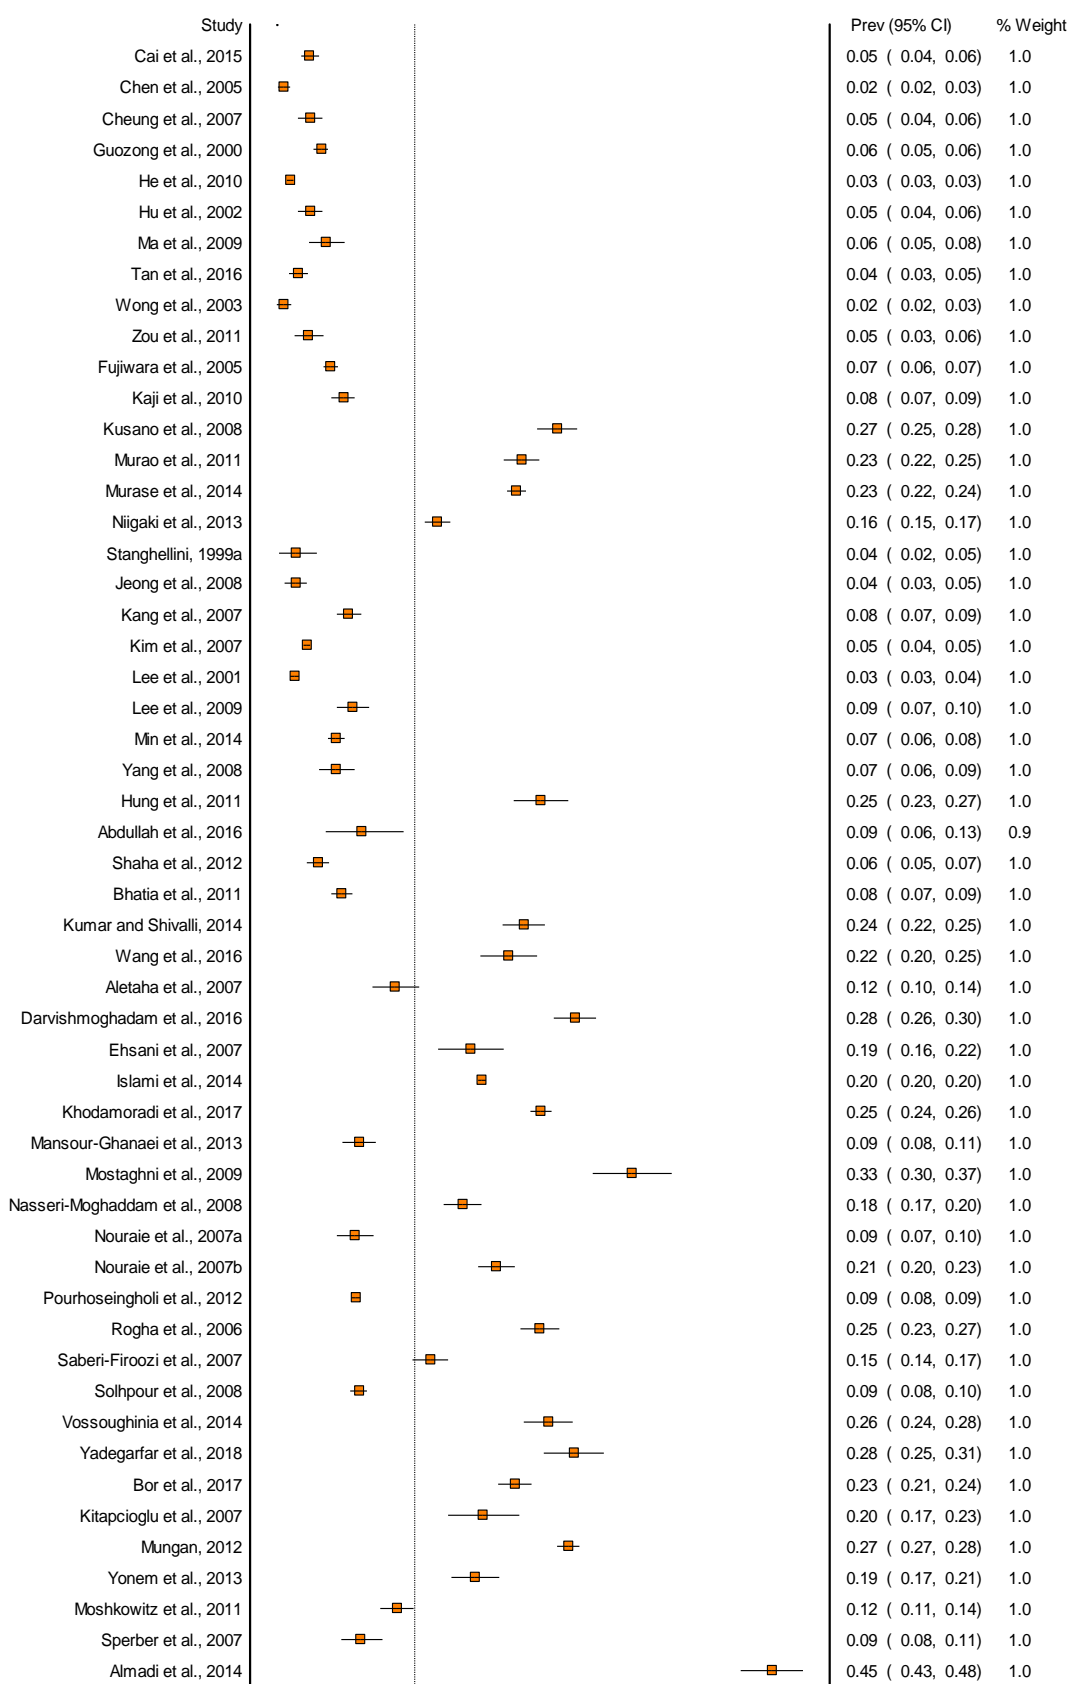

Figure S2. Continued.

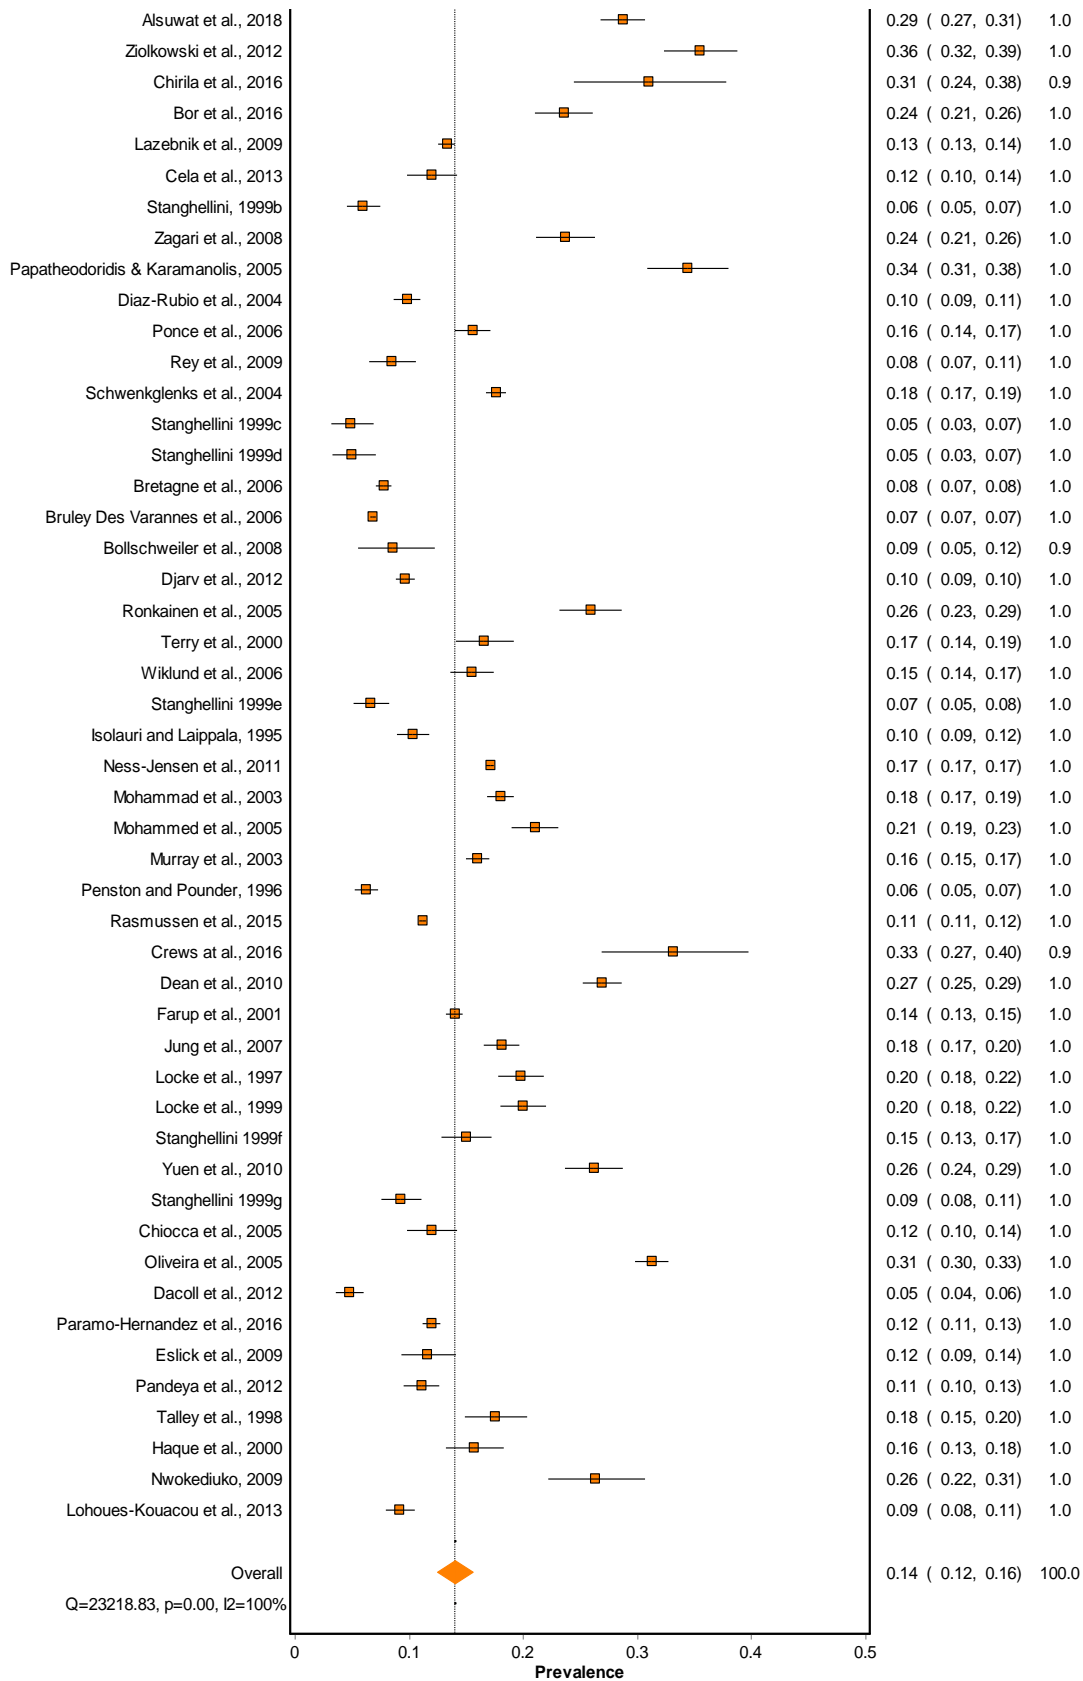

**Figure S2.** Forest plot showing global prevalence of GORD with studies pooled using a random effects model.

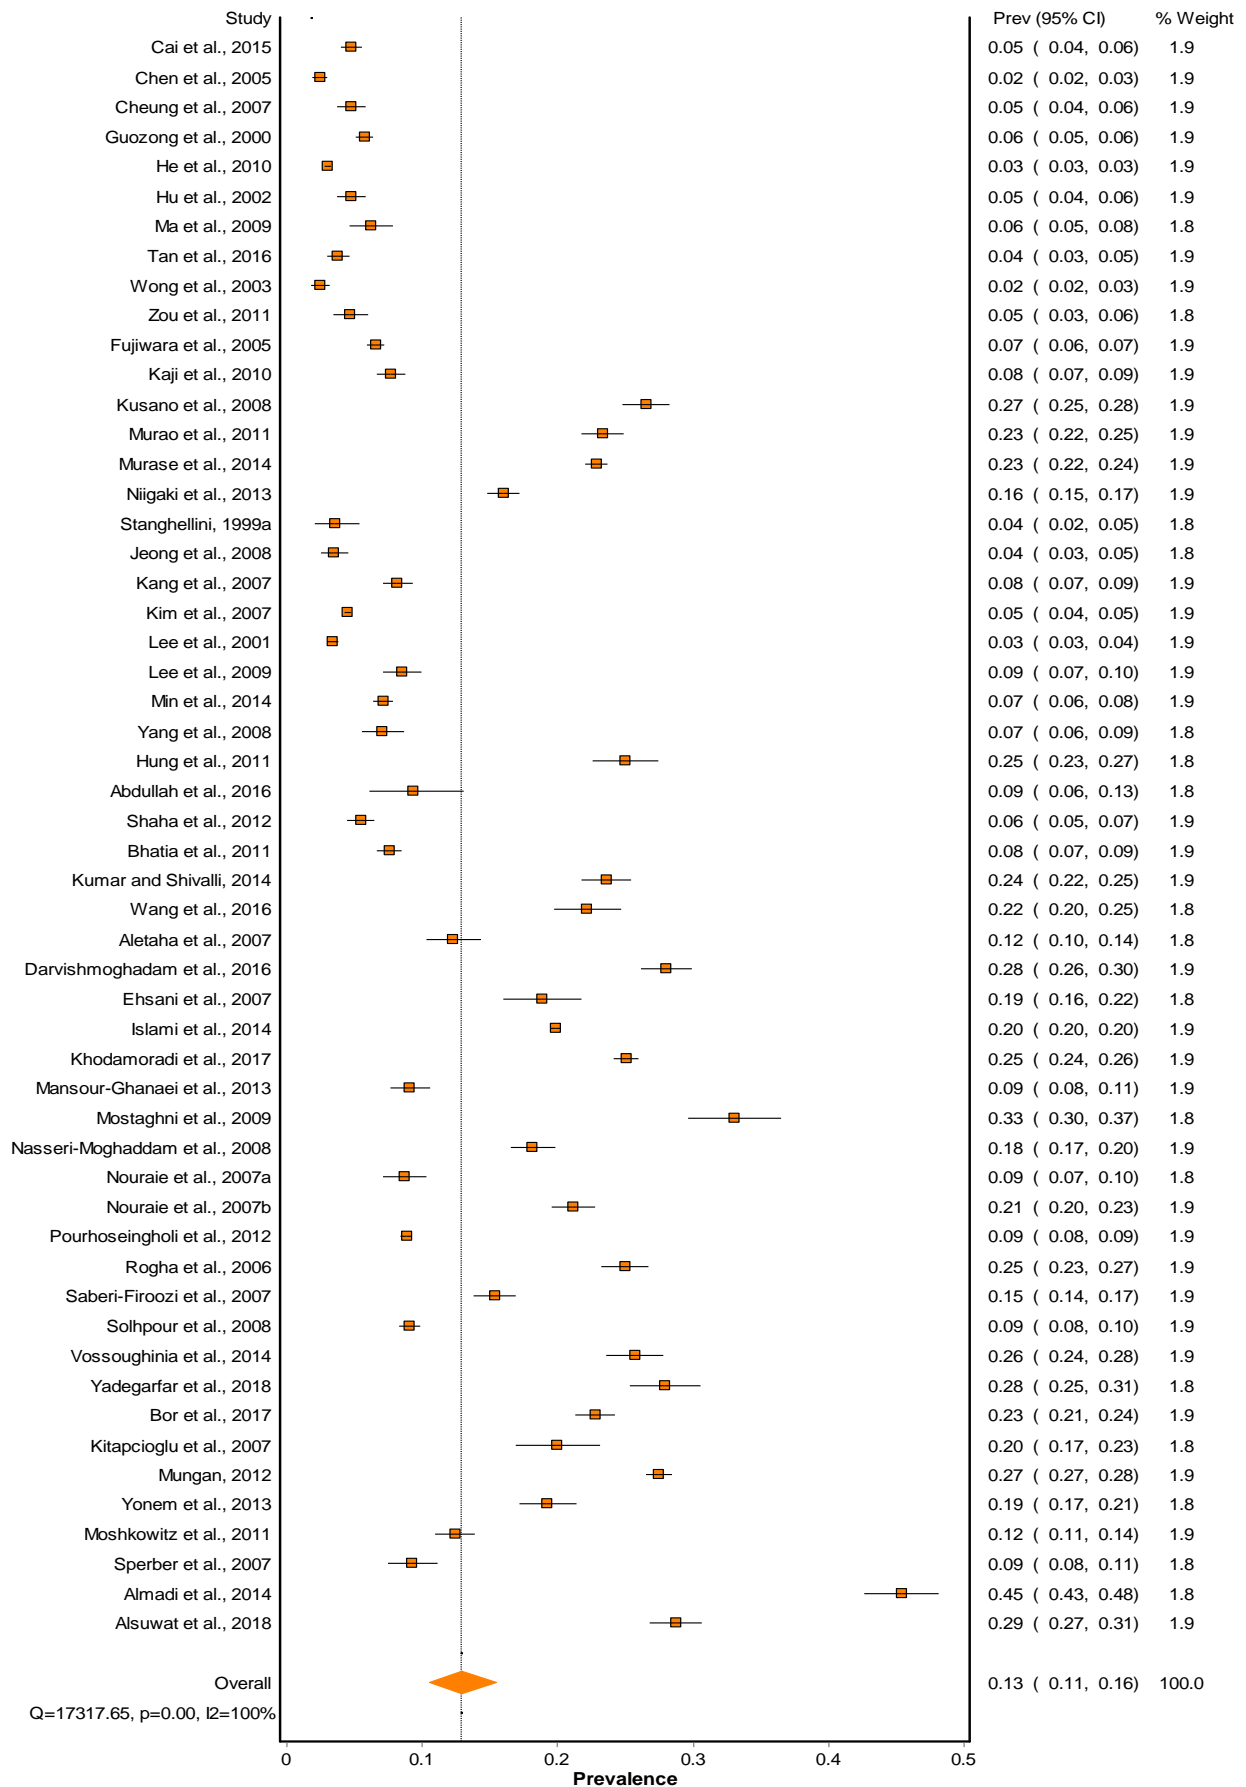

**Figure S3.** Forest plot showing prevalence of GORD in Asia with studies pooled using a random effects model.

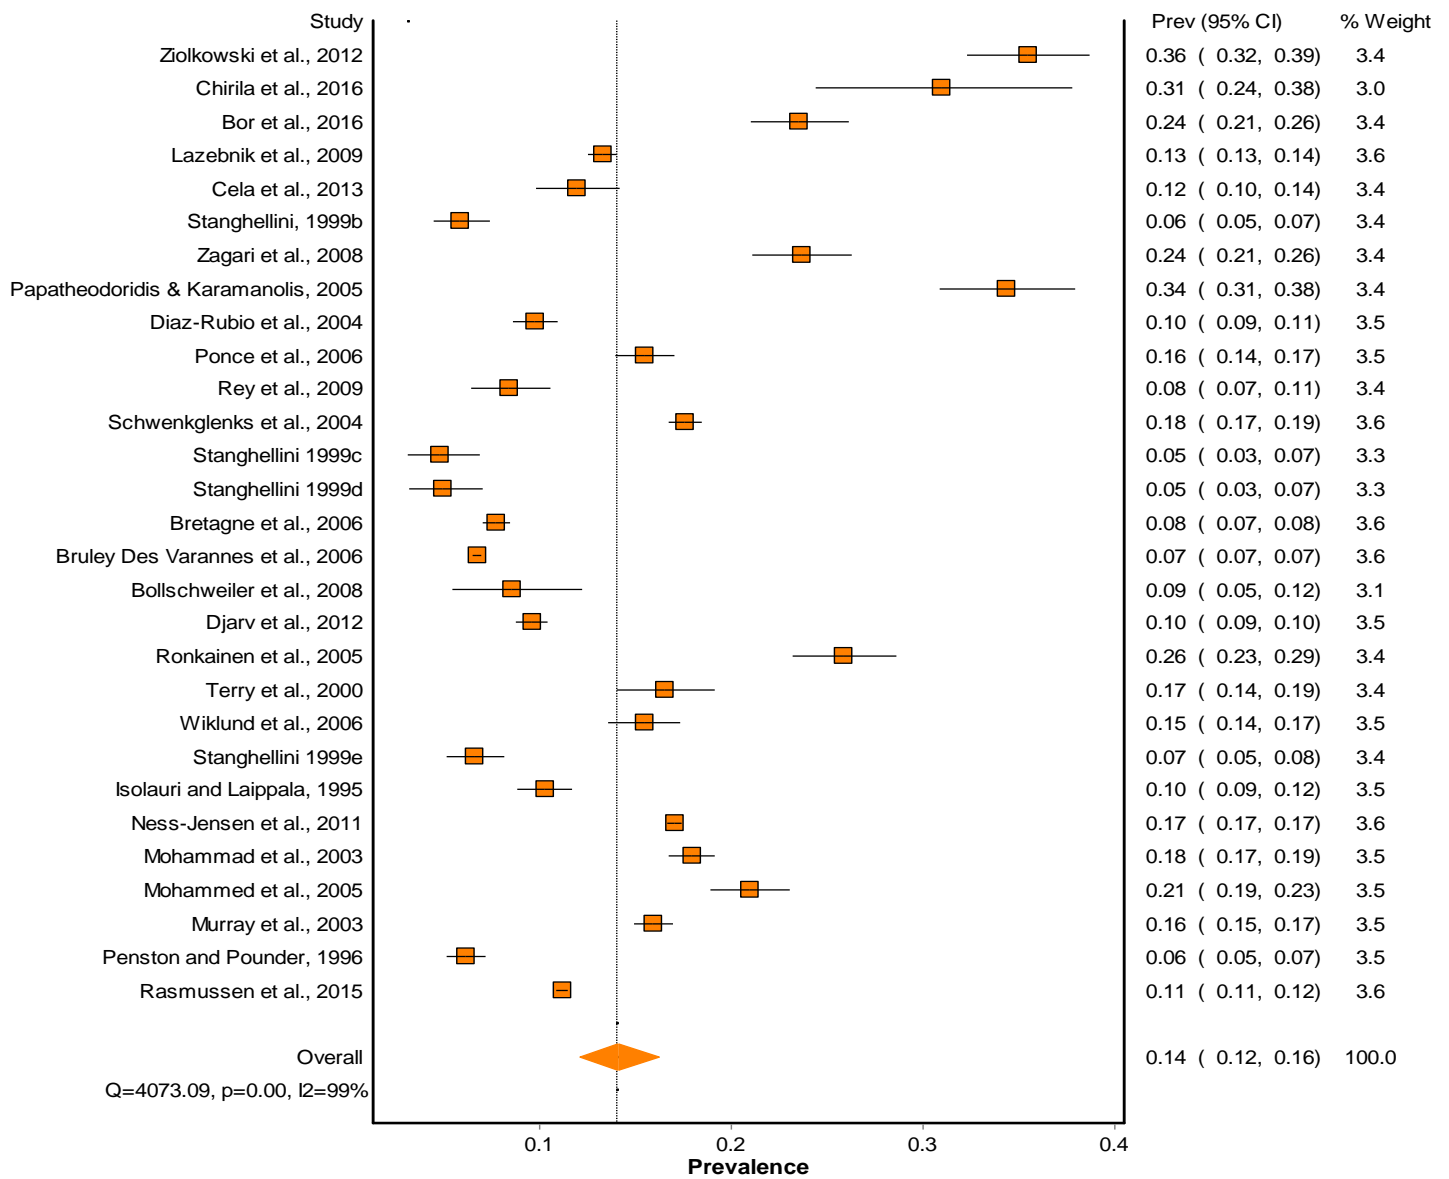

**Figure S4.** Forest plot showing prevalence of GORD in Europe with studies pooled using a random effects model.

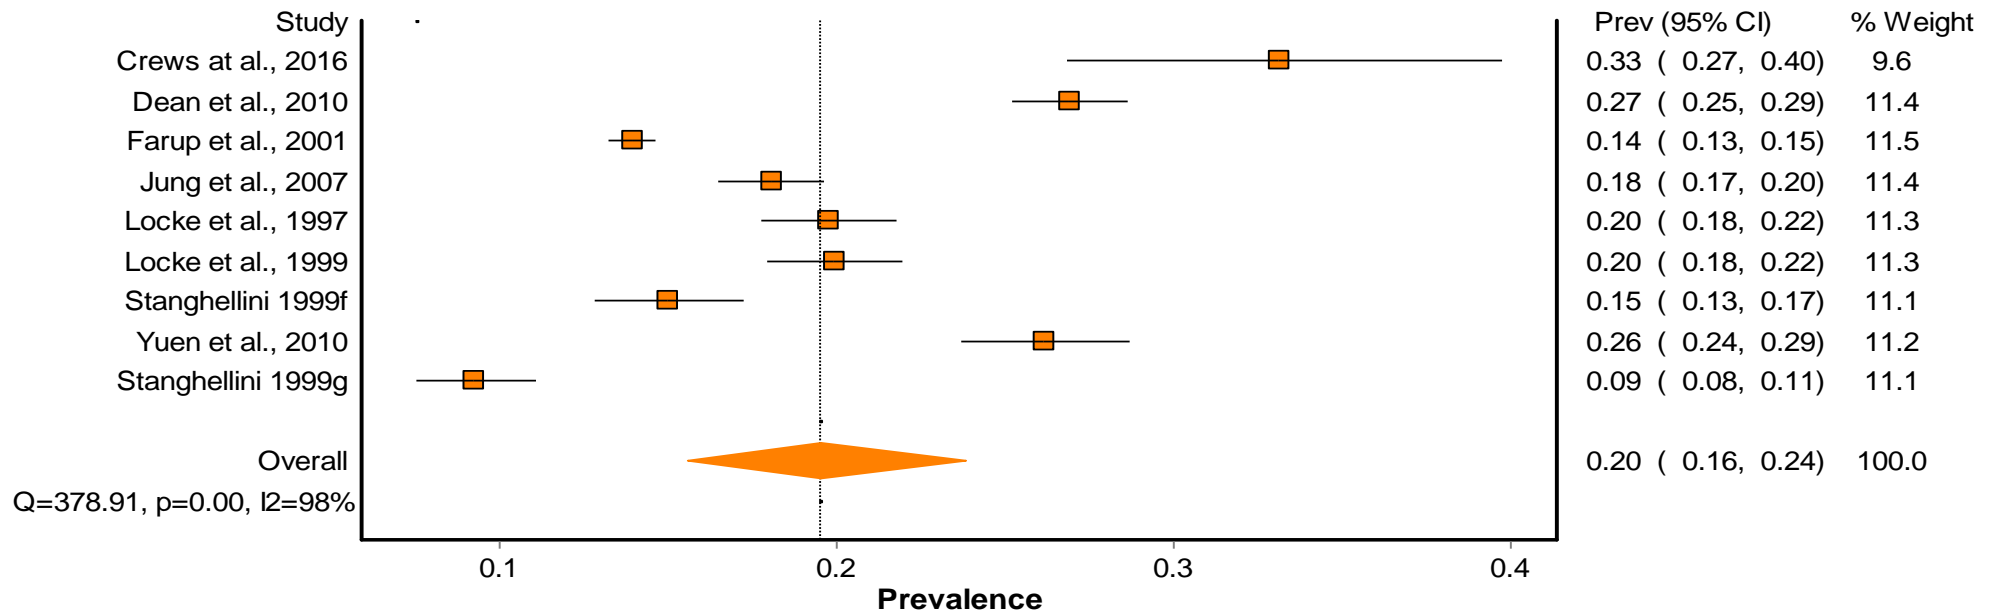

**Figure S5.** Forest plot showing prevalence of GORD in North America with studies pooled using a random effects model.



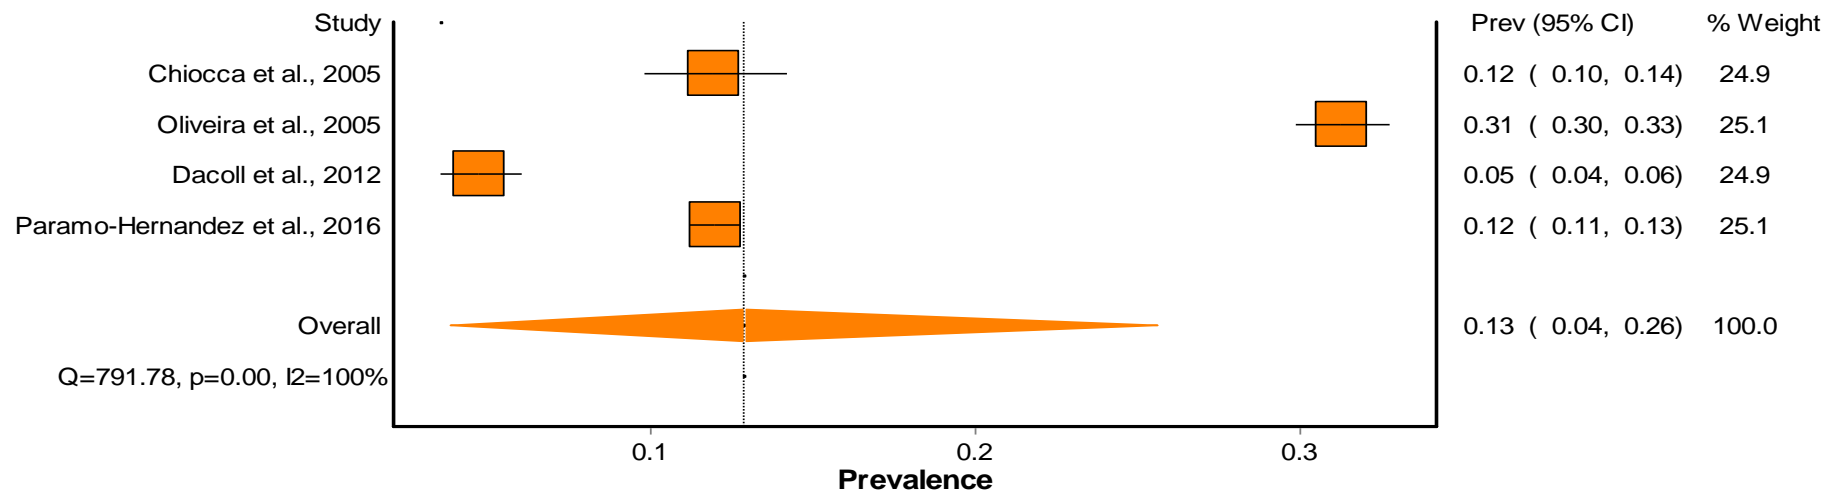

**Figure S6.** Forest plot showing prevalence of GORD in Latin America and the Caribbean with studies pooled using a random effects model.

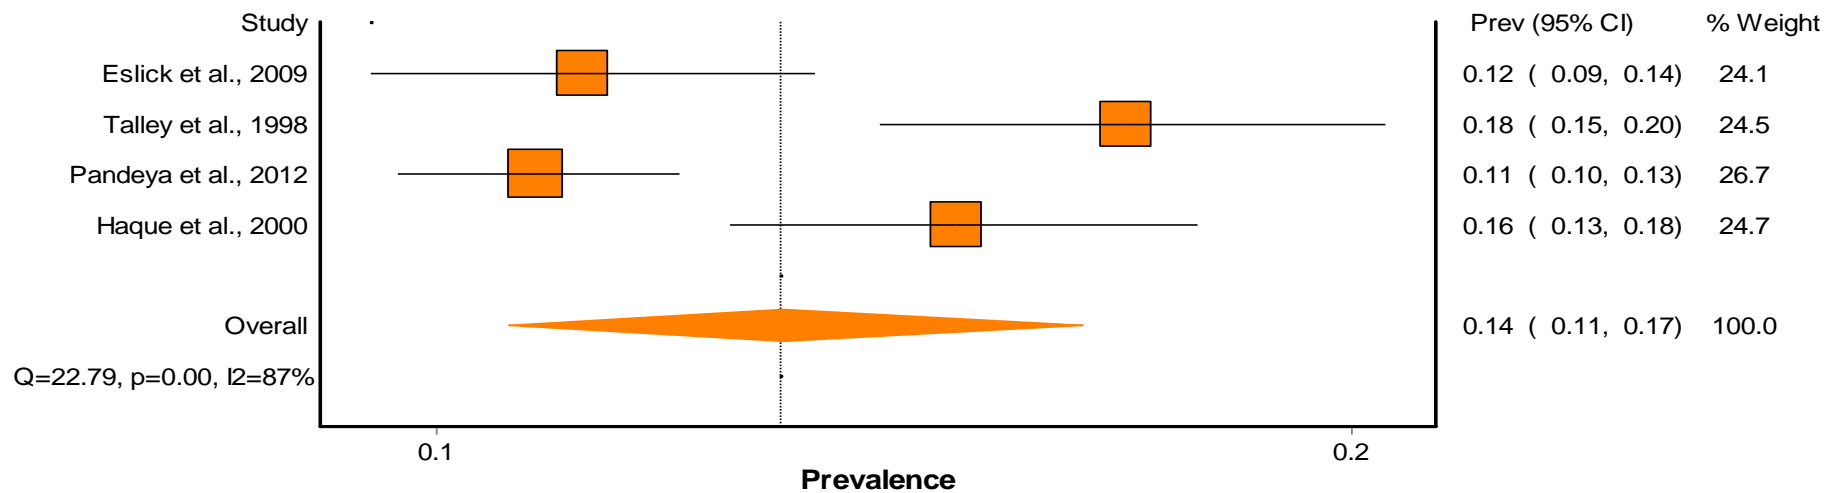

**Figure S7.** Forest plot showing prevalence of GORD in Oceania with studies pooled using a random effects model.

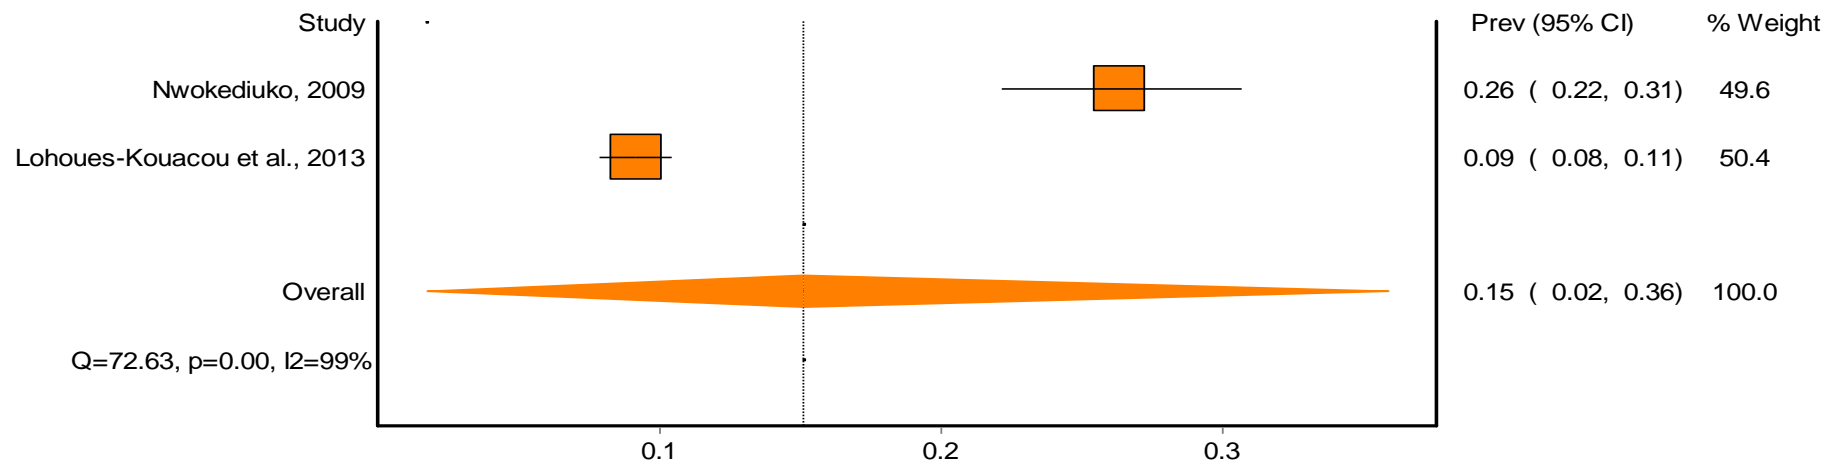

**Figure S8.** Forest plot showing prevalence of GORD in Africa with studies pooled using a random effects model.

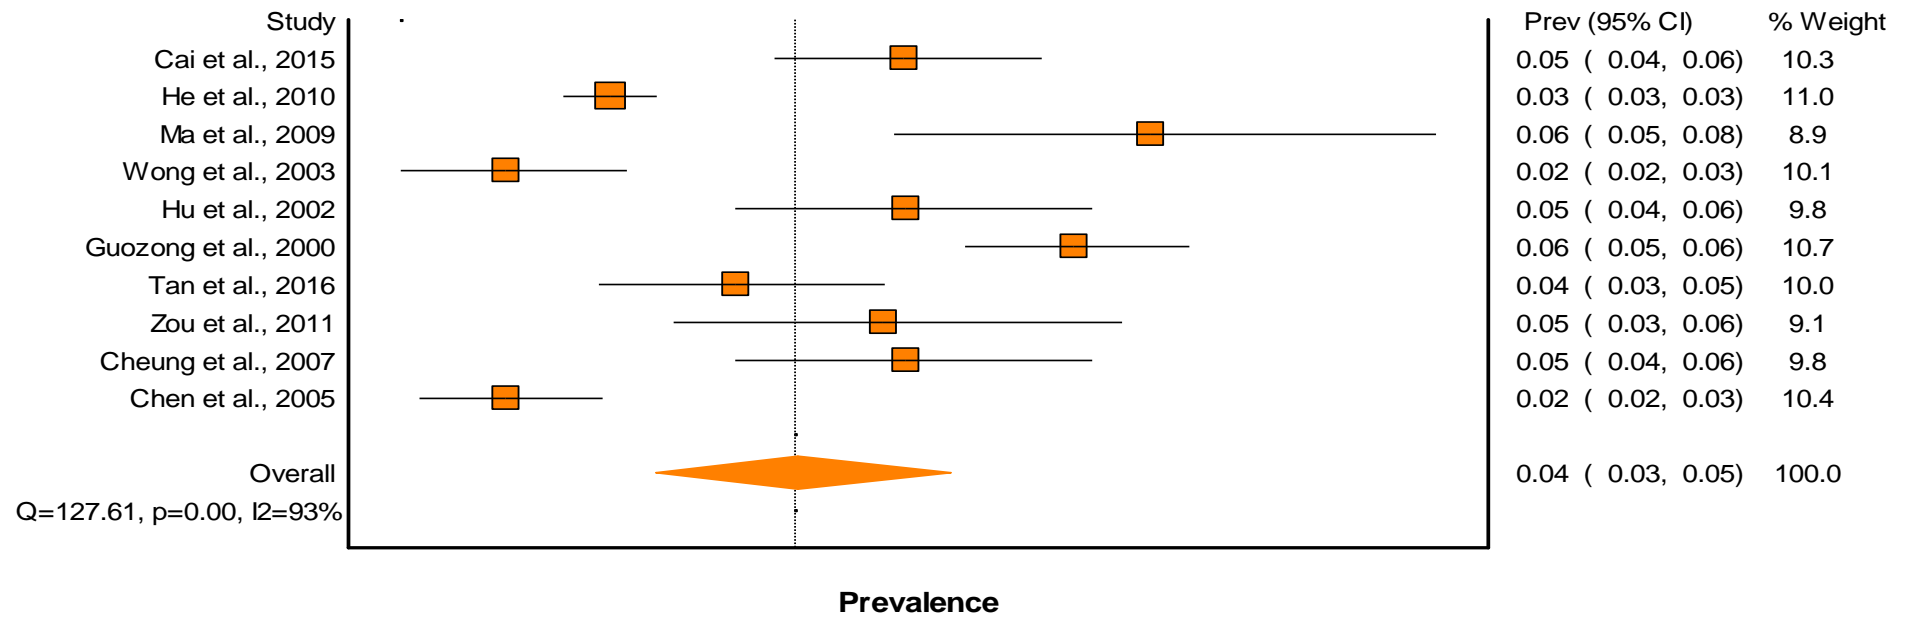

**Figure S9.** Forest plot showing the prevalence of GORD in China with studies pooled using a random effects model.

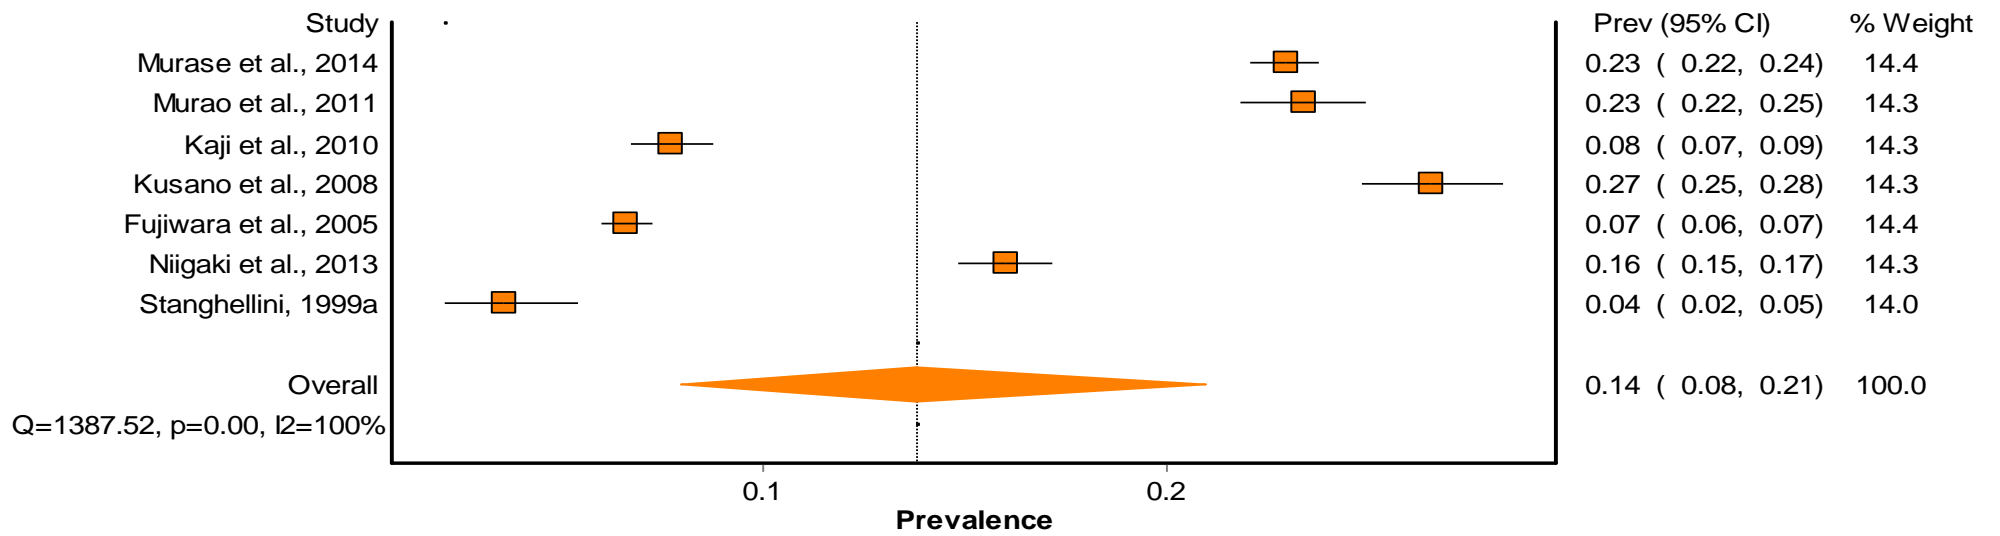

**Figure S10.** Forest plot showing the prevalence of GORD in Japan with studies pooled using a random effects model.

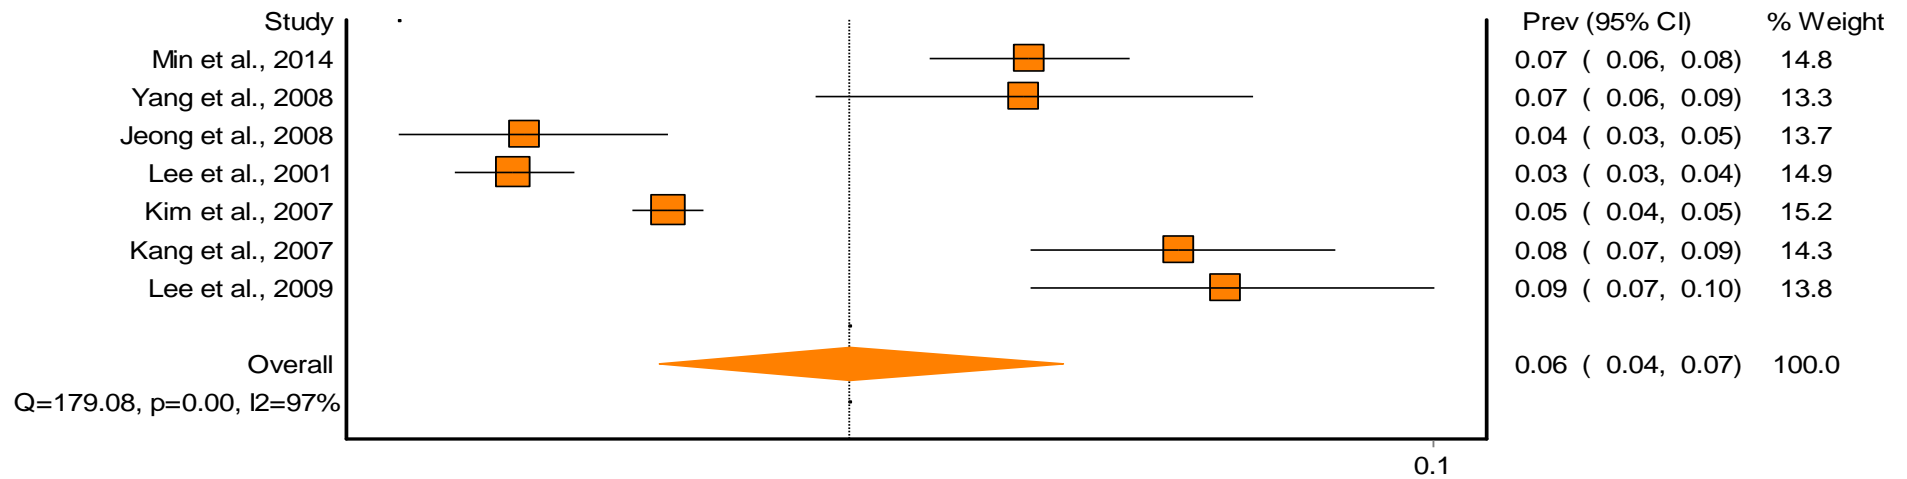

**Figure S11.** Forest plot showing the prevalence of GORD in South Korea with studies pooled using a random effects model.

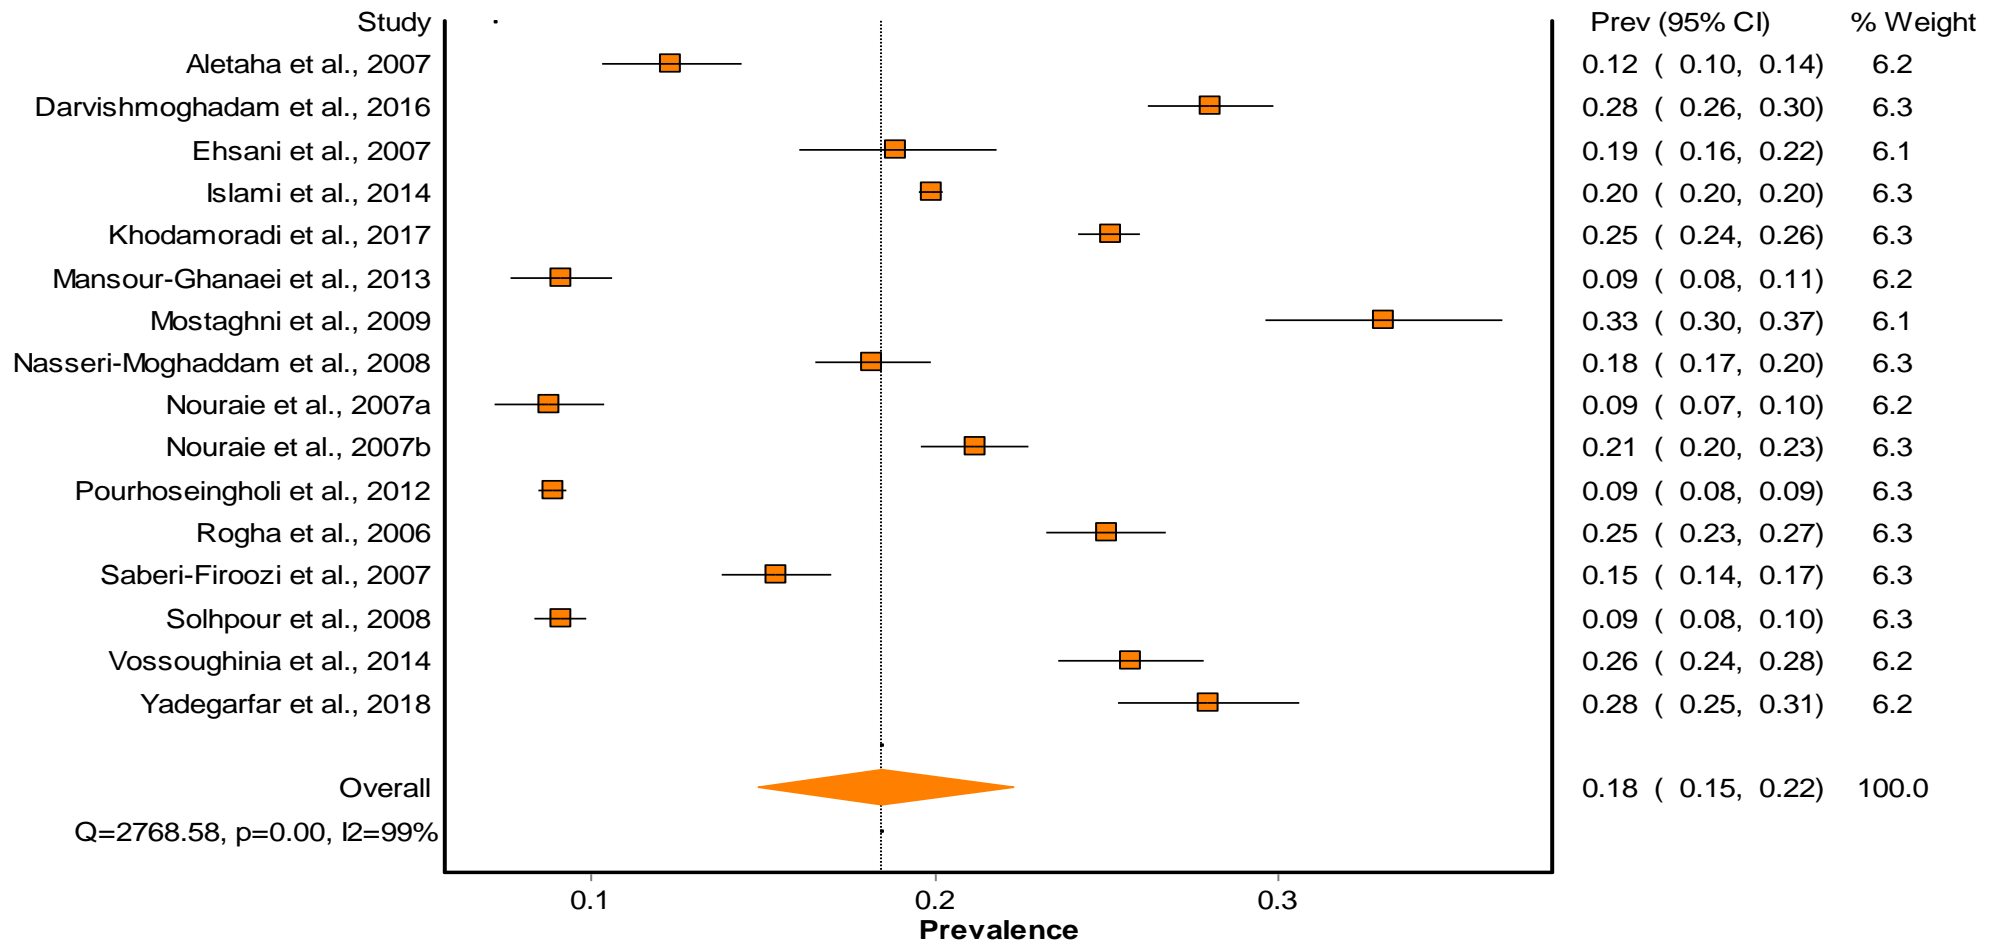

**Figure S12.** Forest plot showing the prevalence of GORD in Iran with studies pooled using a random effects model.

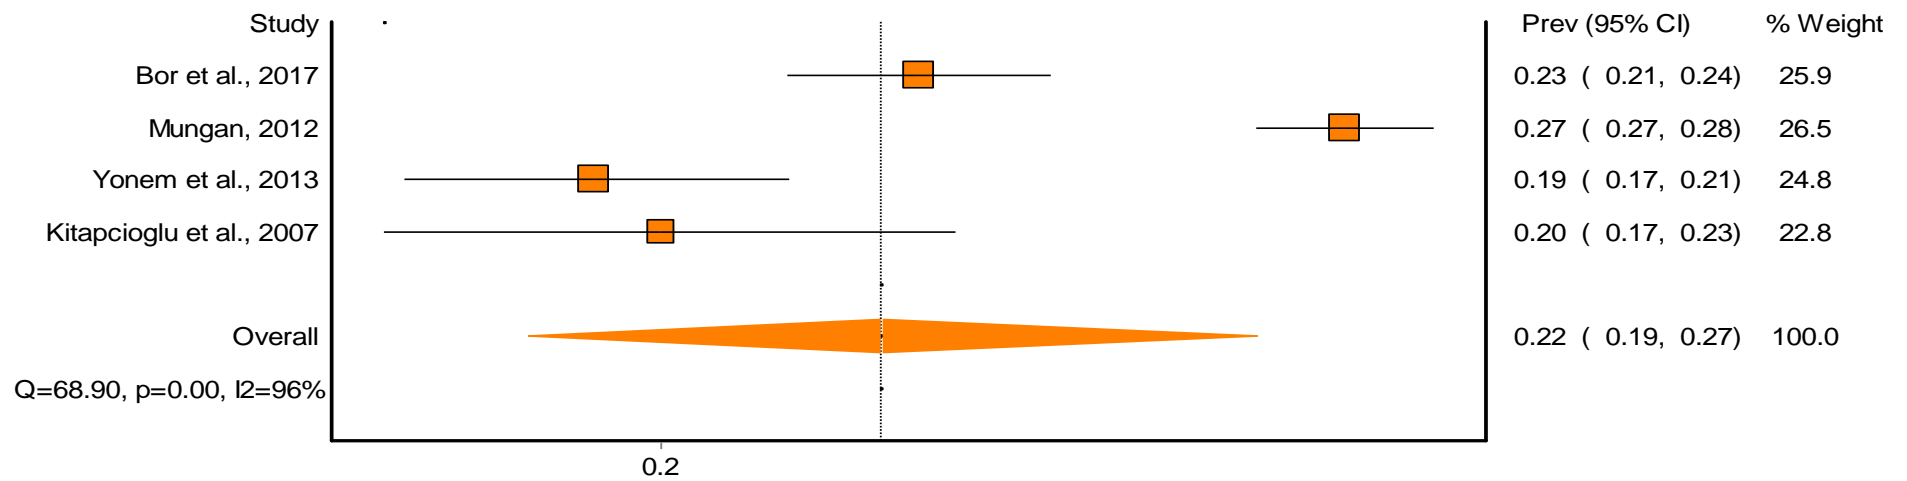

**Figure S13.** Forest plot showing the prevalence of GORD in Turkey with studies pooled using a random effects model.



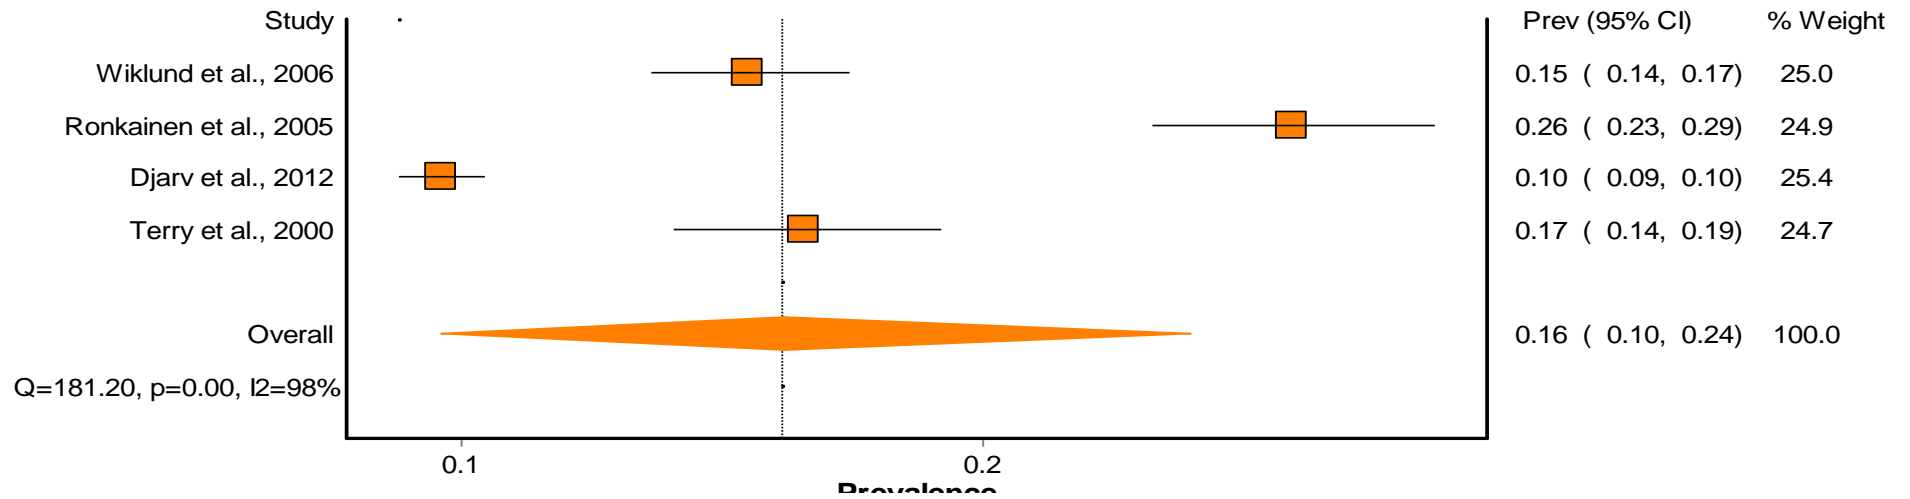

**Figure S14.** Forest plot showing the prevalence of GORD in Sweden with studies pooled using a random effects model.

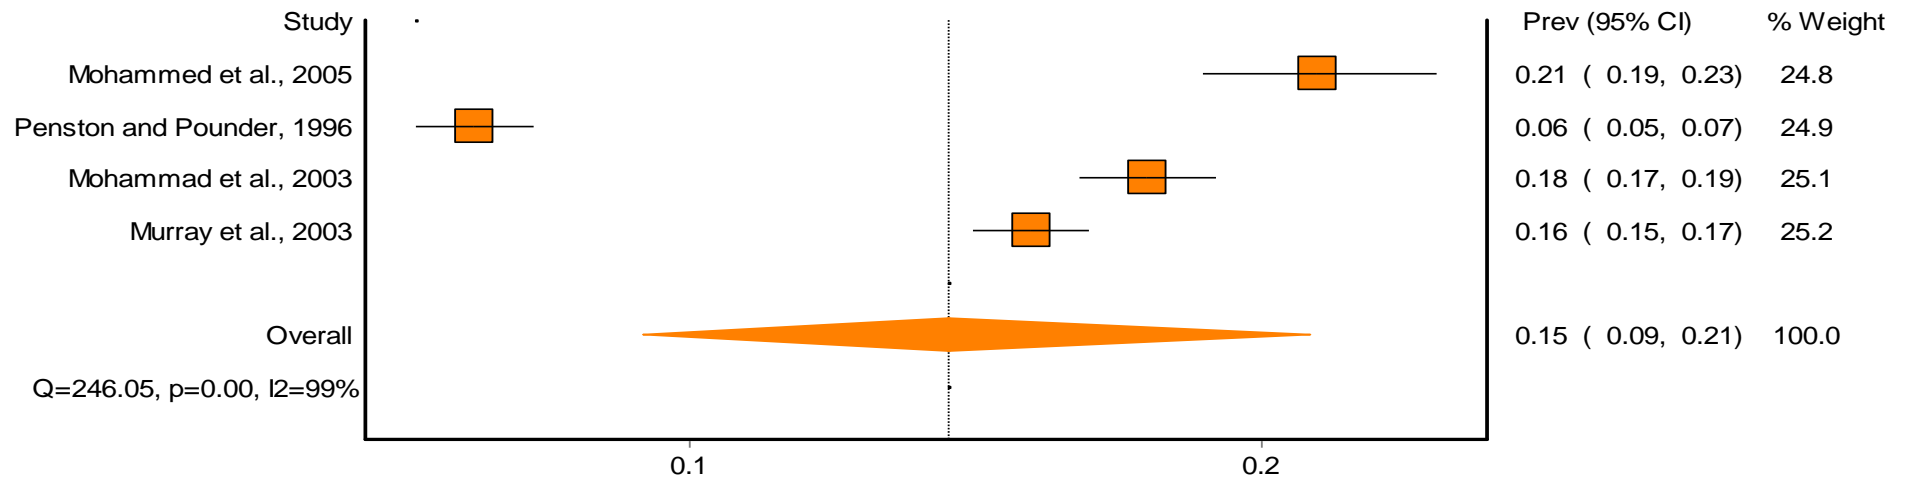

**Figure S15.** Forest plot showing the prevalence of GORD in UK with studies pooled using a random effects model.

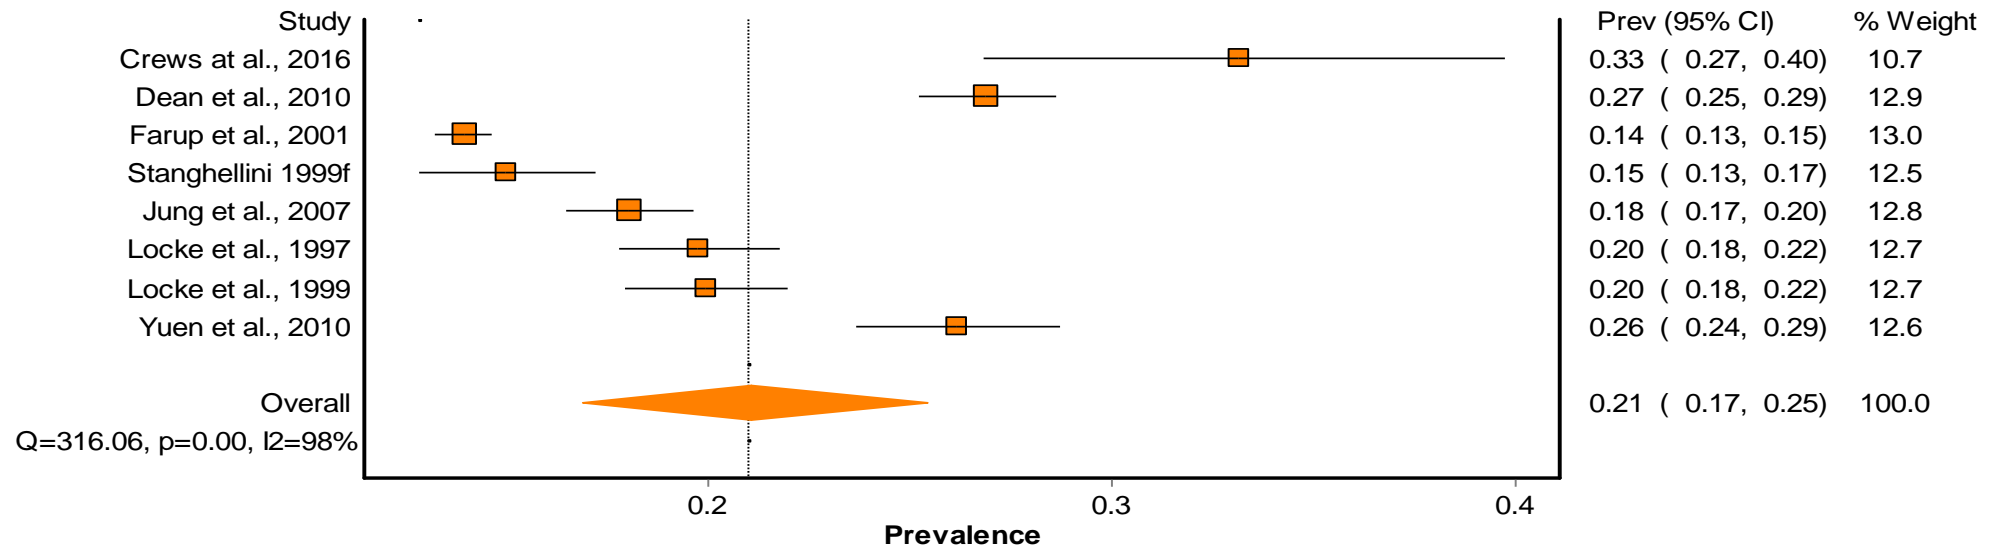

**Figure S16.** Forest plot showing the prevalence of GORD in USA with studies pooled using a random effects model.

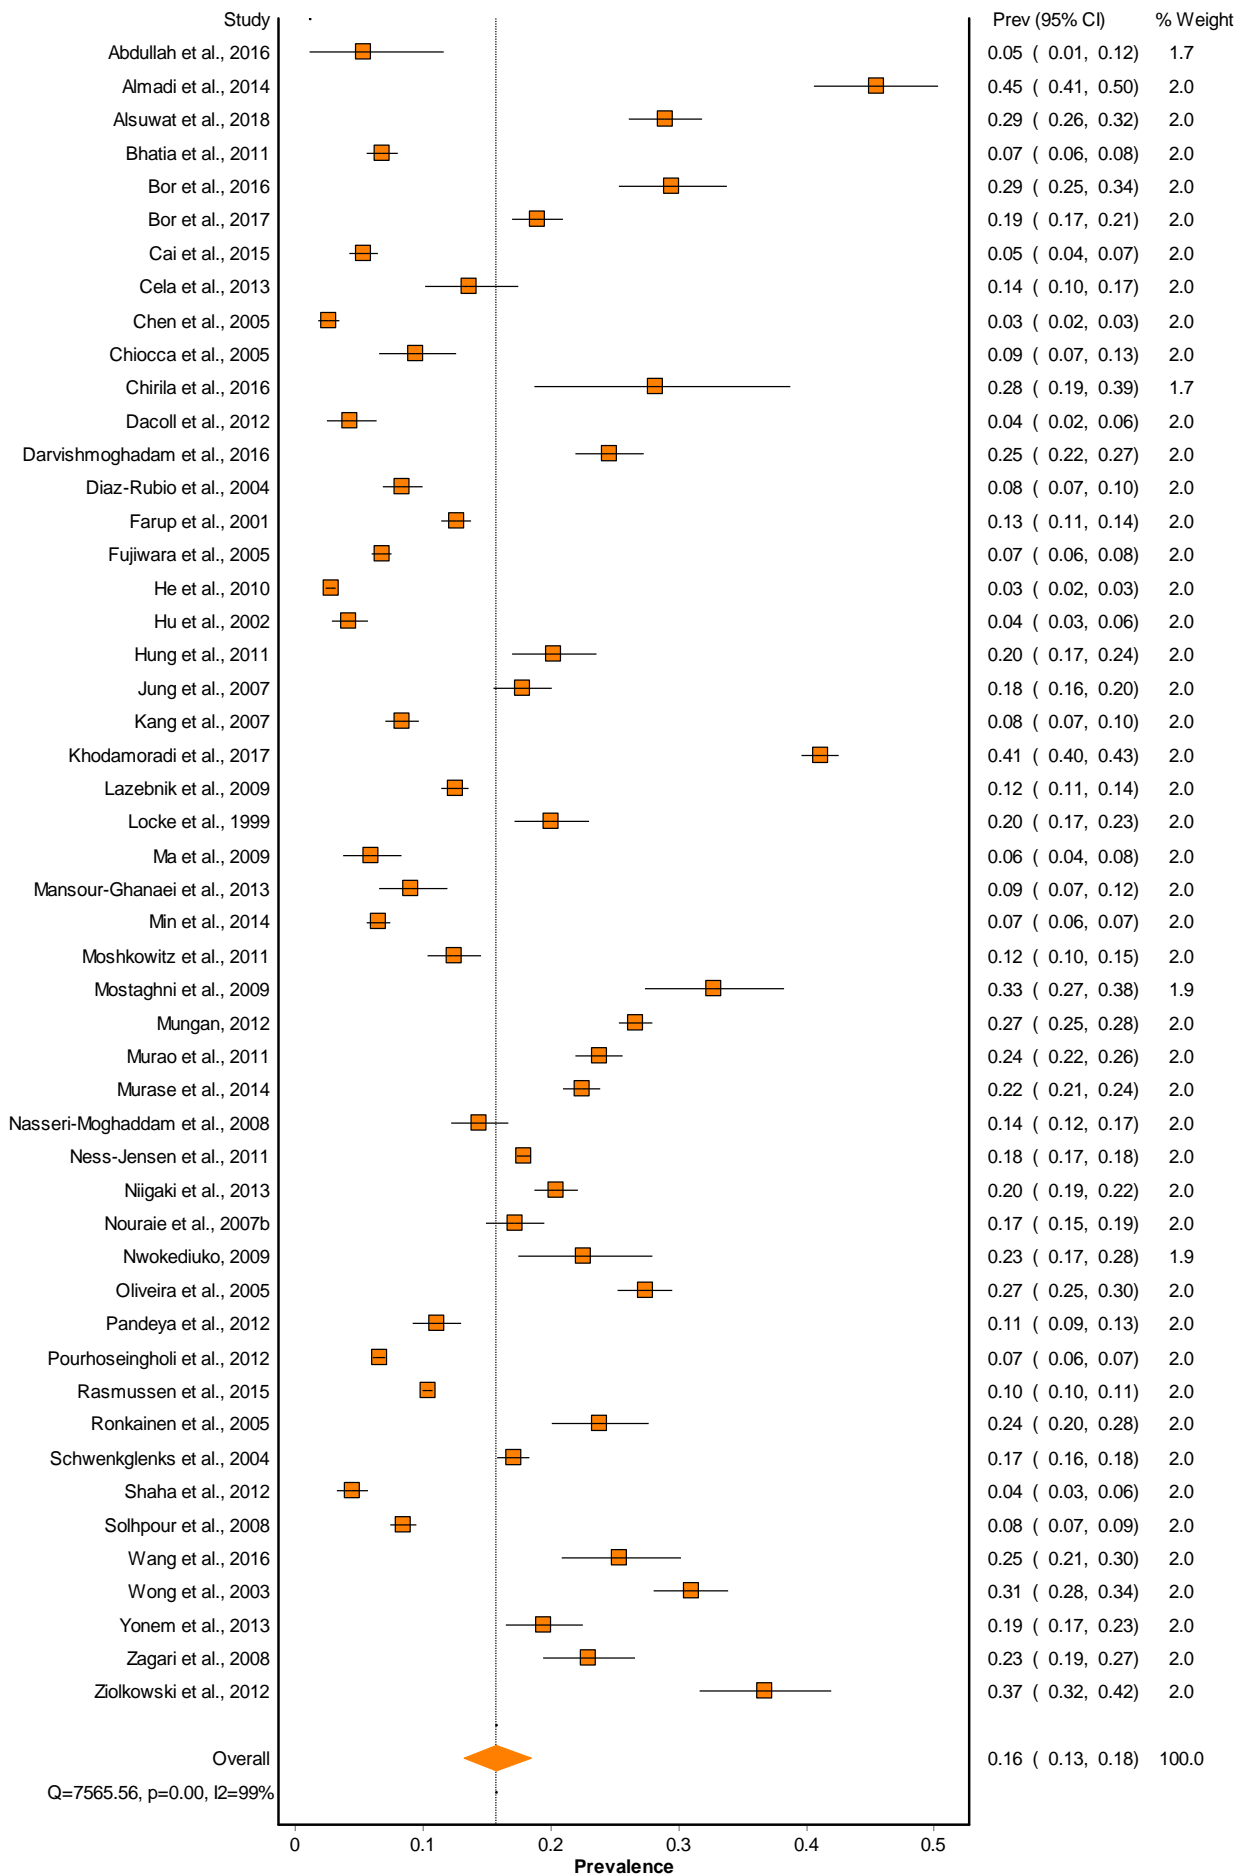

**Figure S17.** Forest plot showing global prevalence of GORD in males with studies pooled using a random effects model.

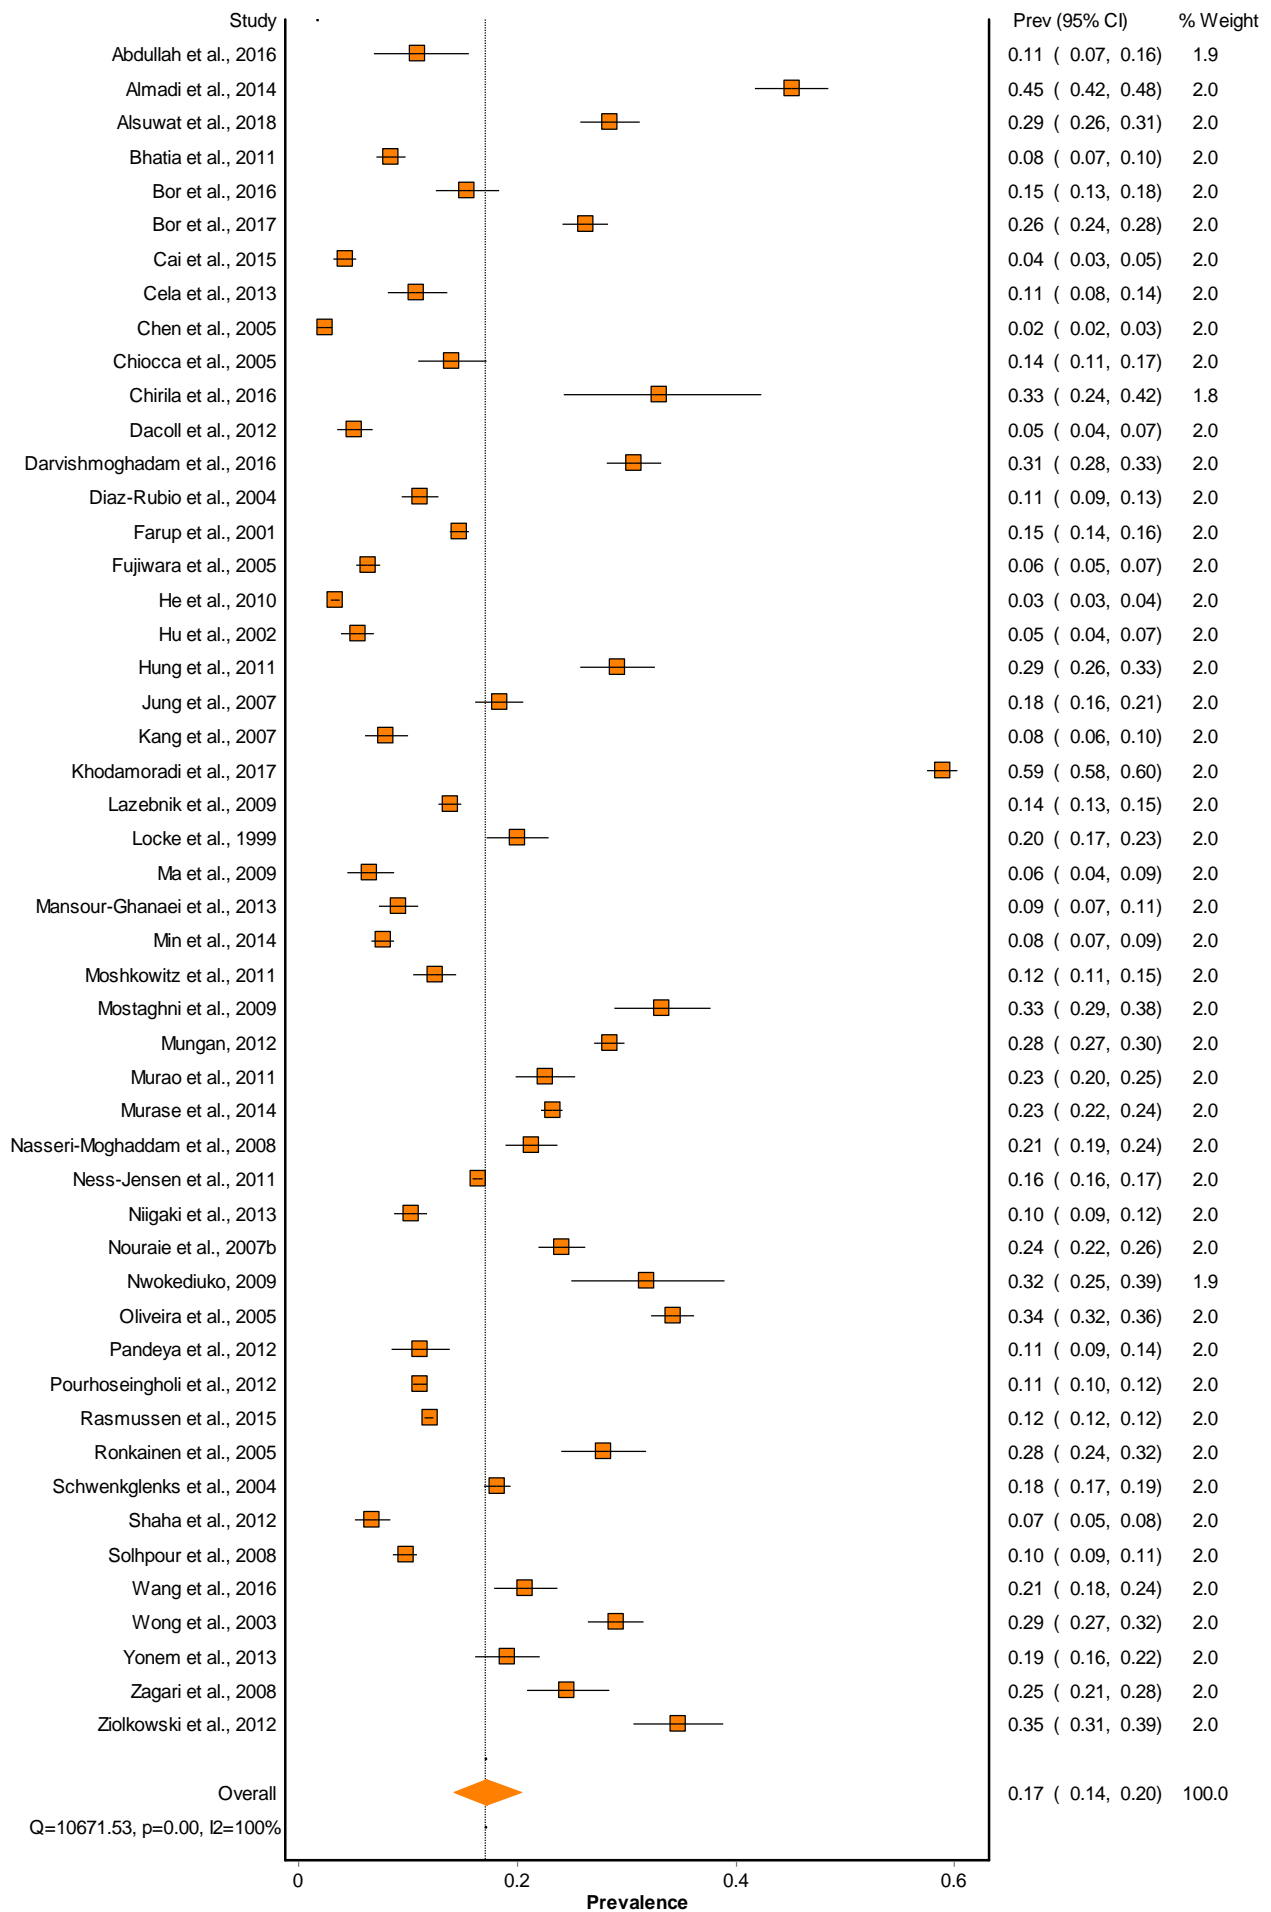

**Figure S18.** Forest plot showing global prevalence of GORD in females with studies pooled using a random effects model.

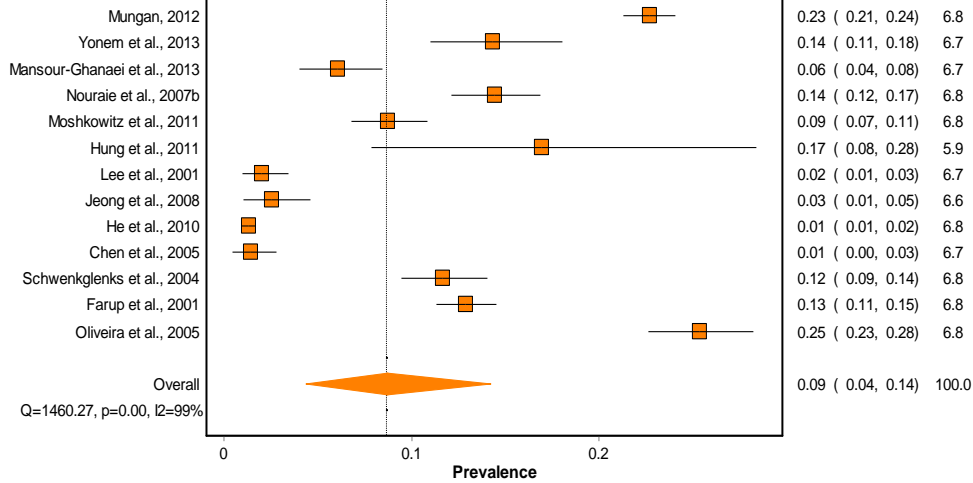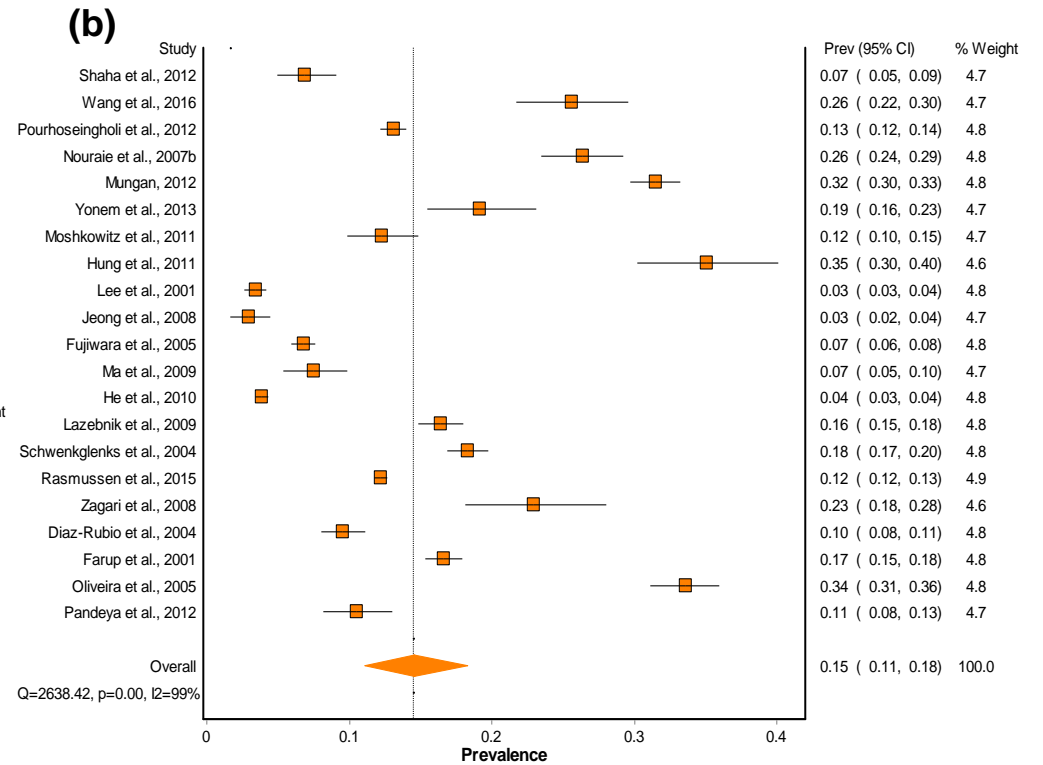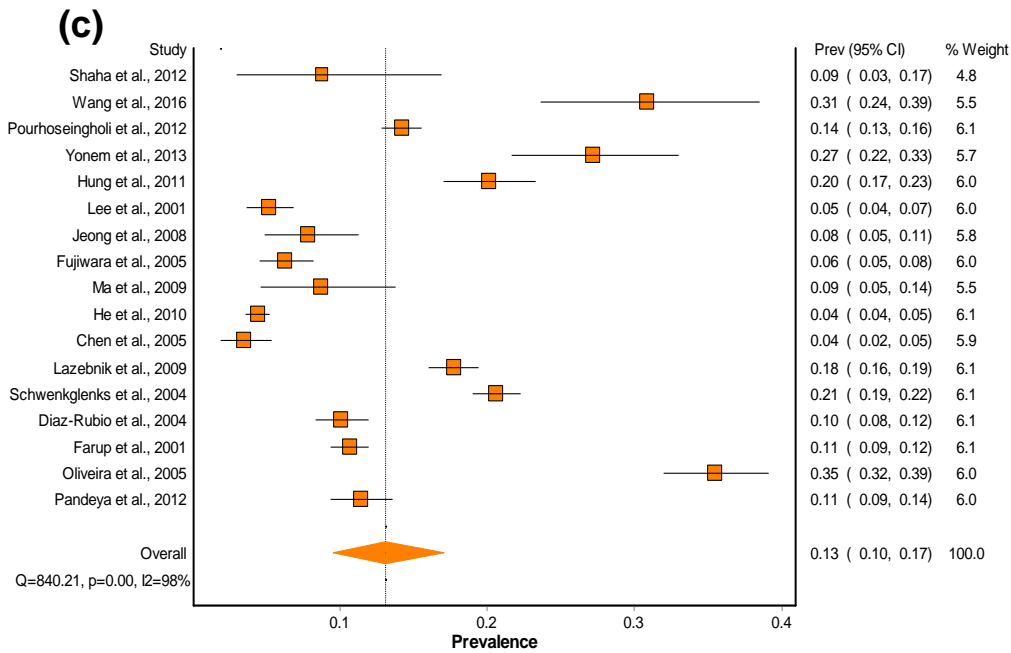

**Figure S19.** Forest plots showing global prevalence of GORD according to age groups with studies pooled using a random effects model.  
 (a) 18-34 years.  
 (b) 35-59 years.  
 (c)  $\geq 60$  years.

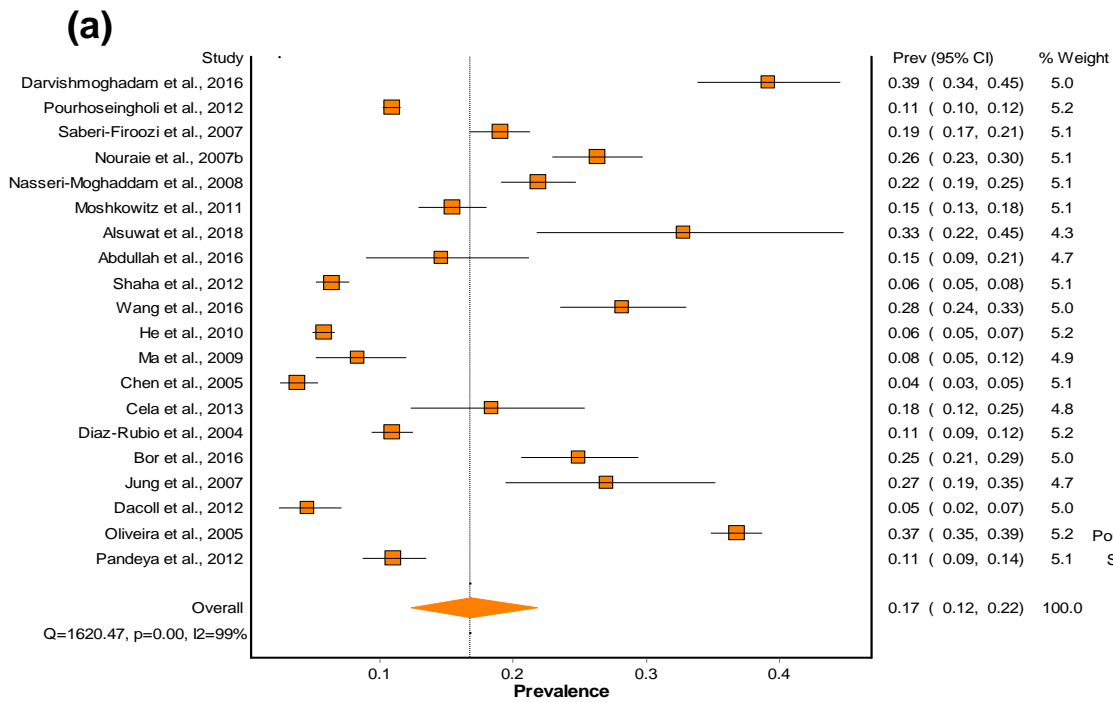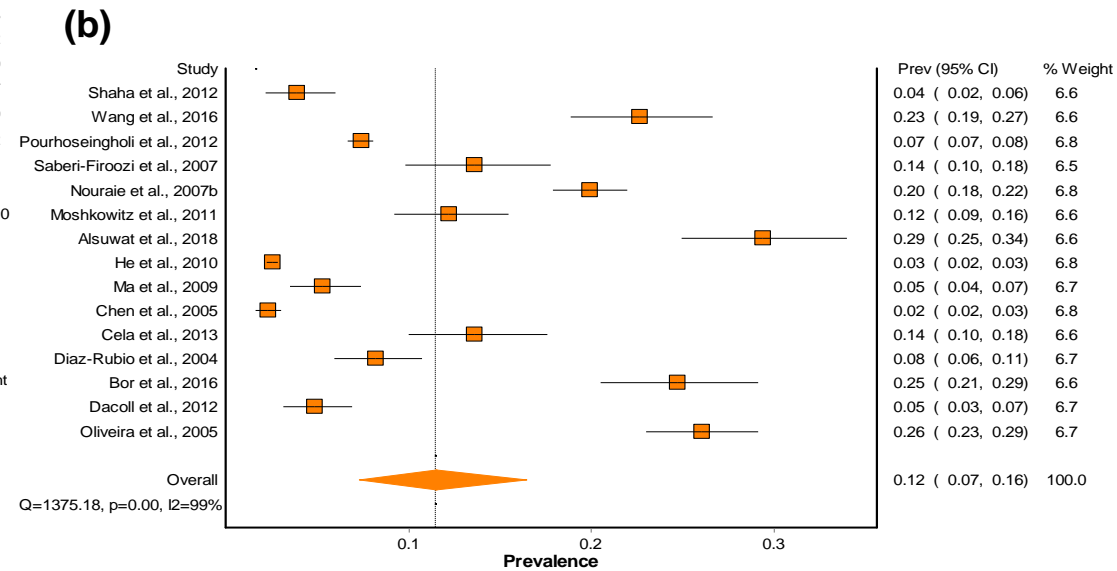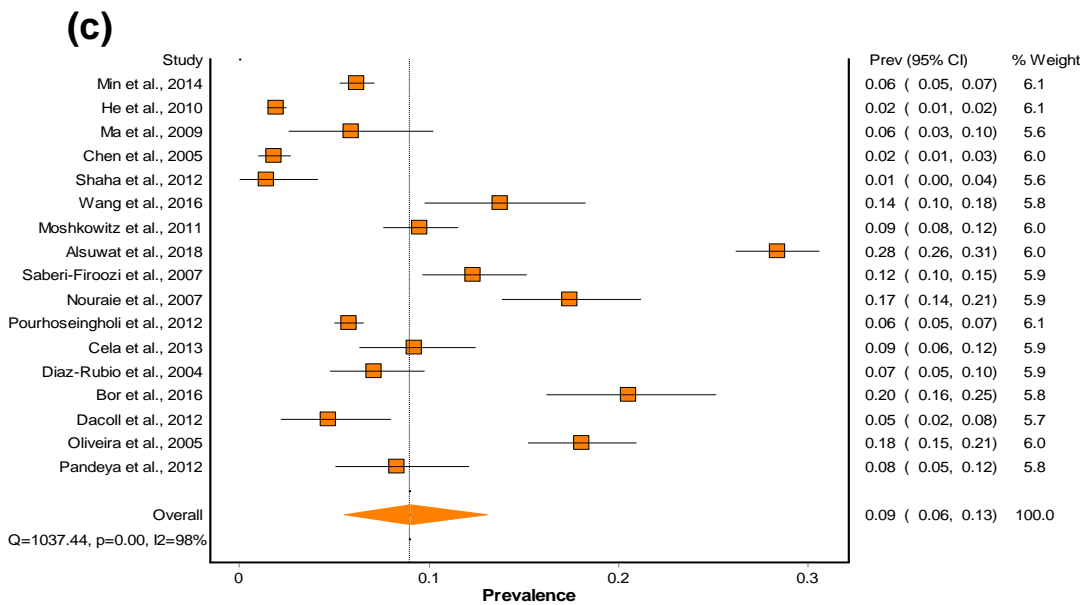

**Figure S20.** Forest plots showing global prevalence of GORD according to education level with studies pooled using a random effects model.  
 (a) Low education level.  
 (b) Medium education level.  
 (c) High education level.

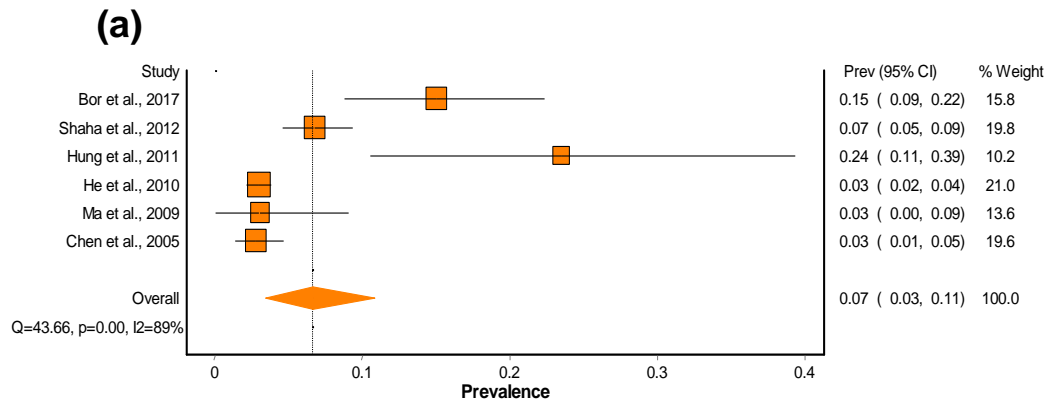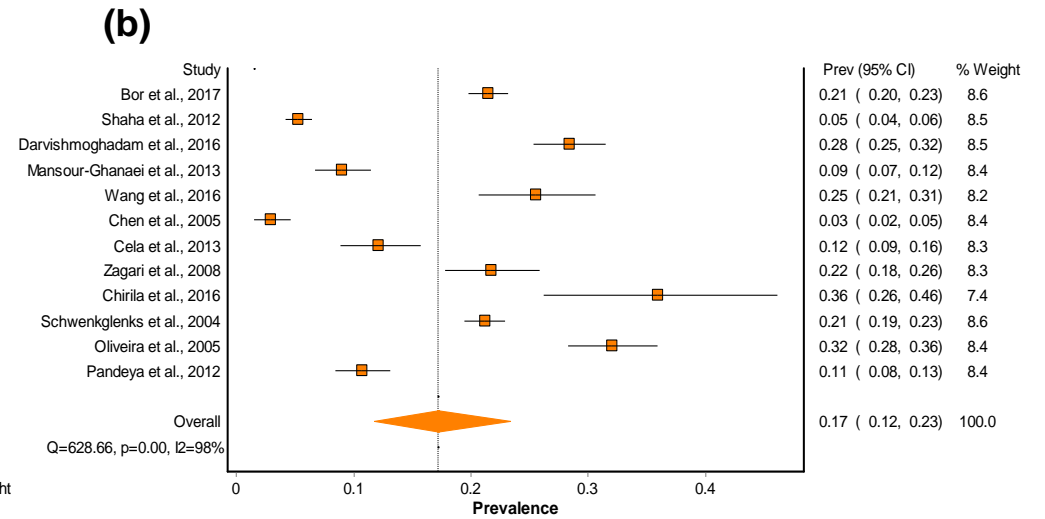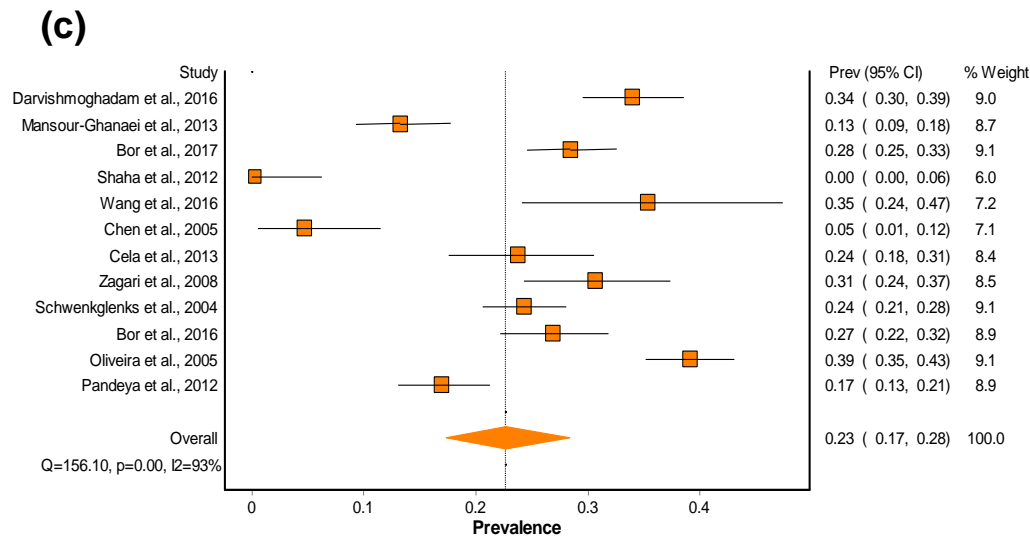

**Figure S21.** Forest plots showing global prevalence of GORD according to BMI level with studies pooled using a random effects model.

(a) <18.5

(b) 18.5-29.9

(c)  $\geq 30$



(a)

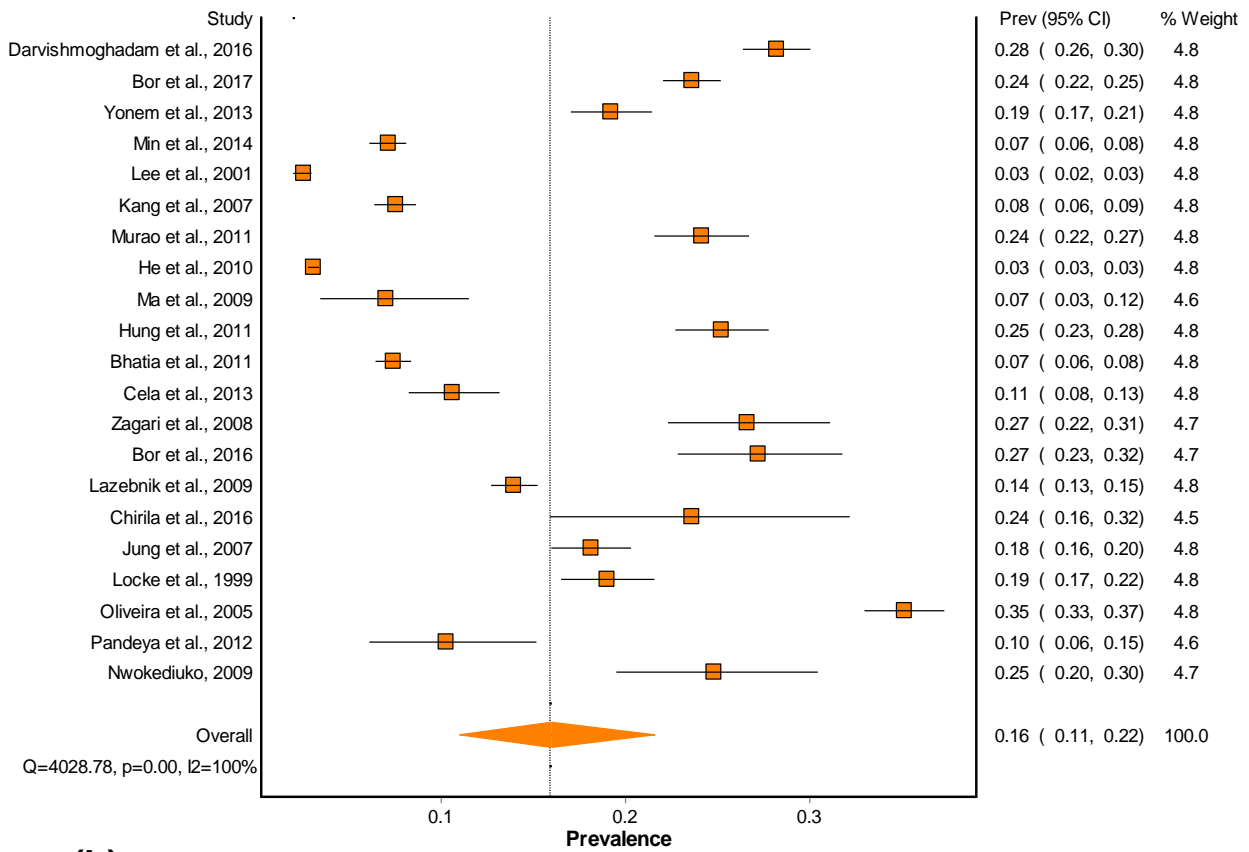

(b)

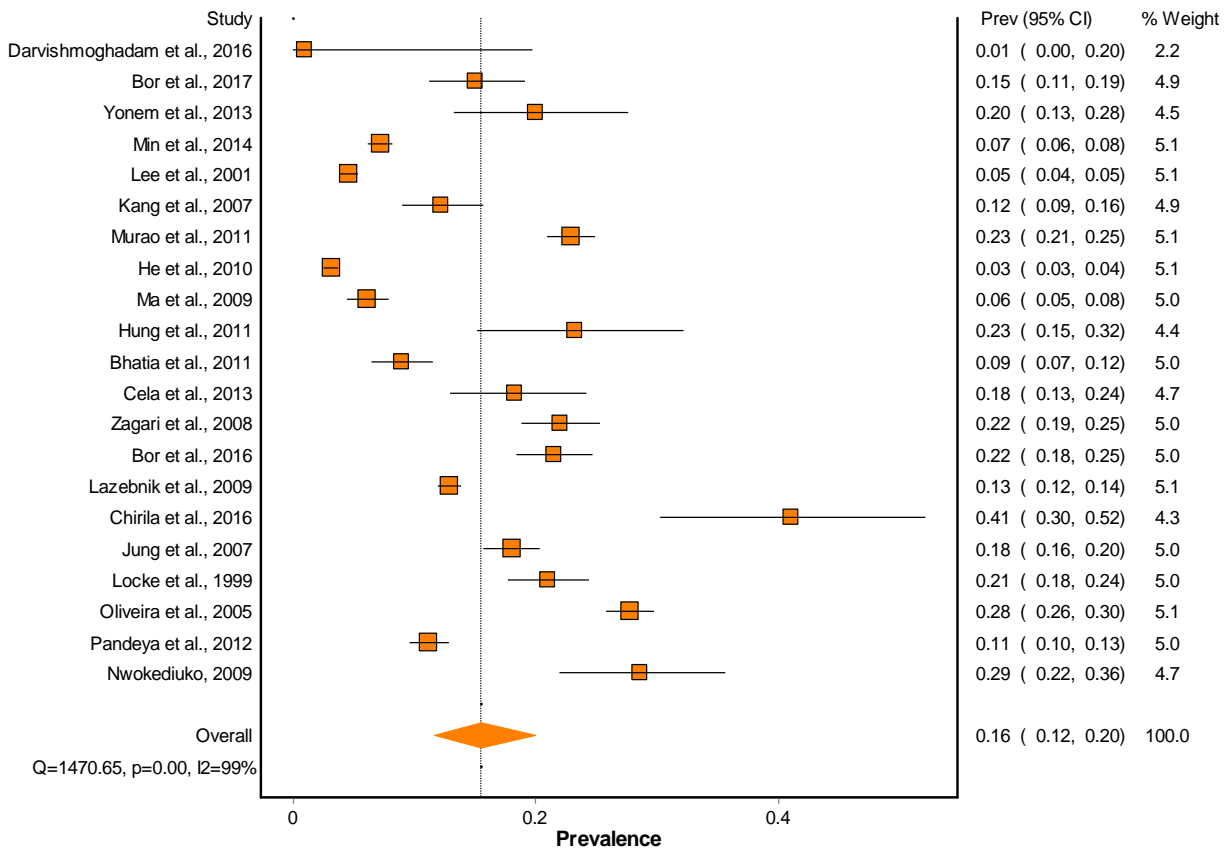

**Figure S22.** Forest plots showing global prevalence of GORD according to alcohol intake with studies pooled using a random effects model.

(a) None-low intake.

(b) Moderate-high intake.

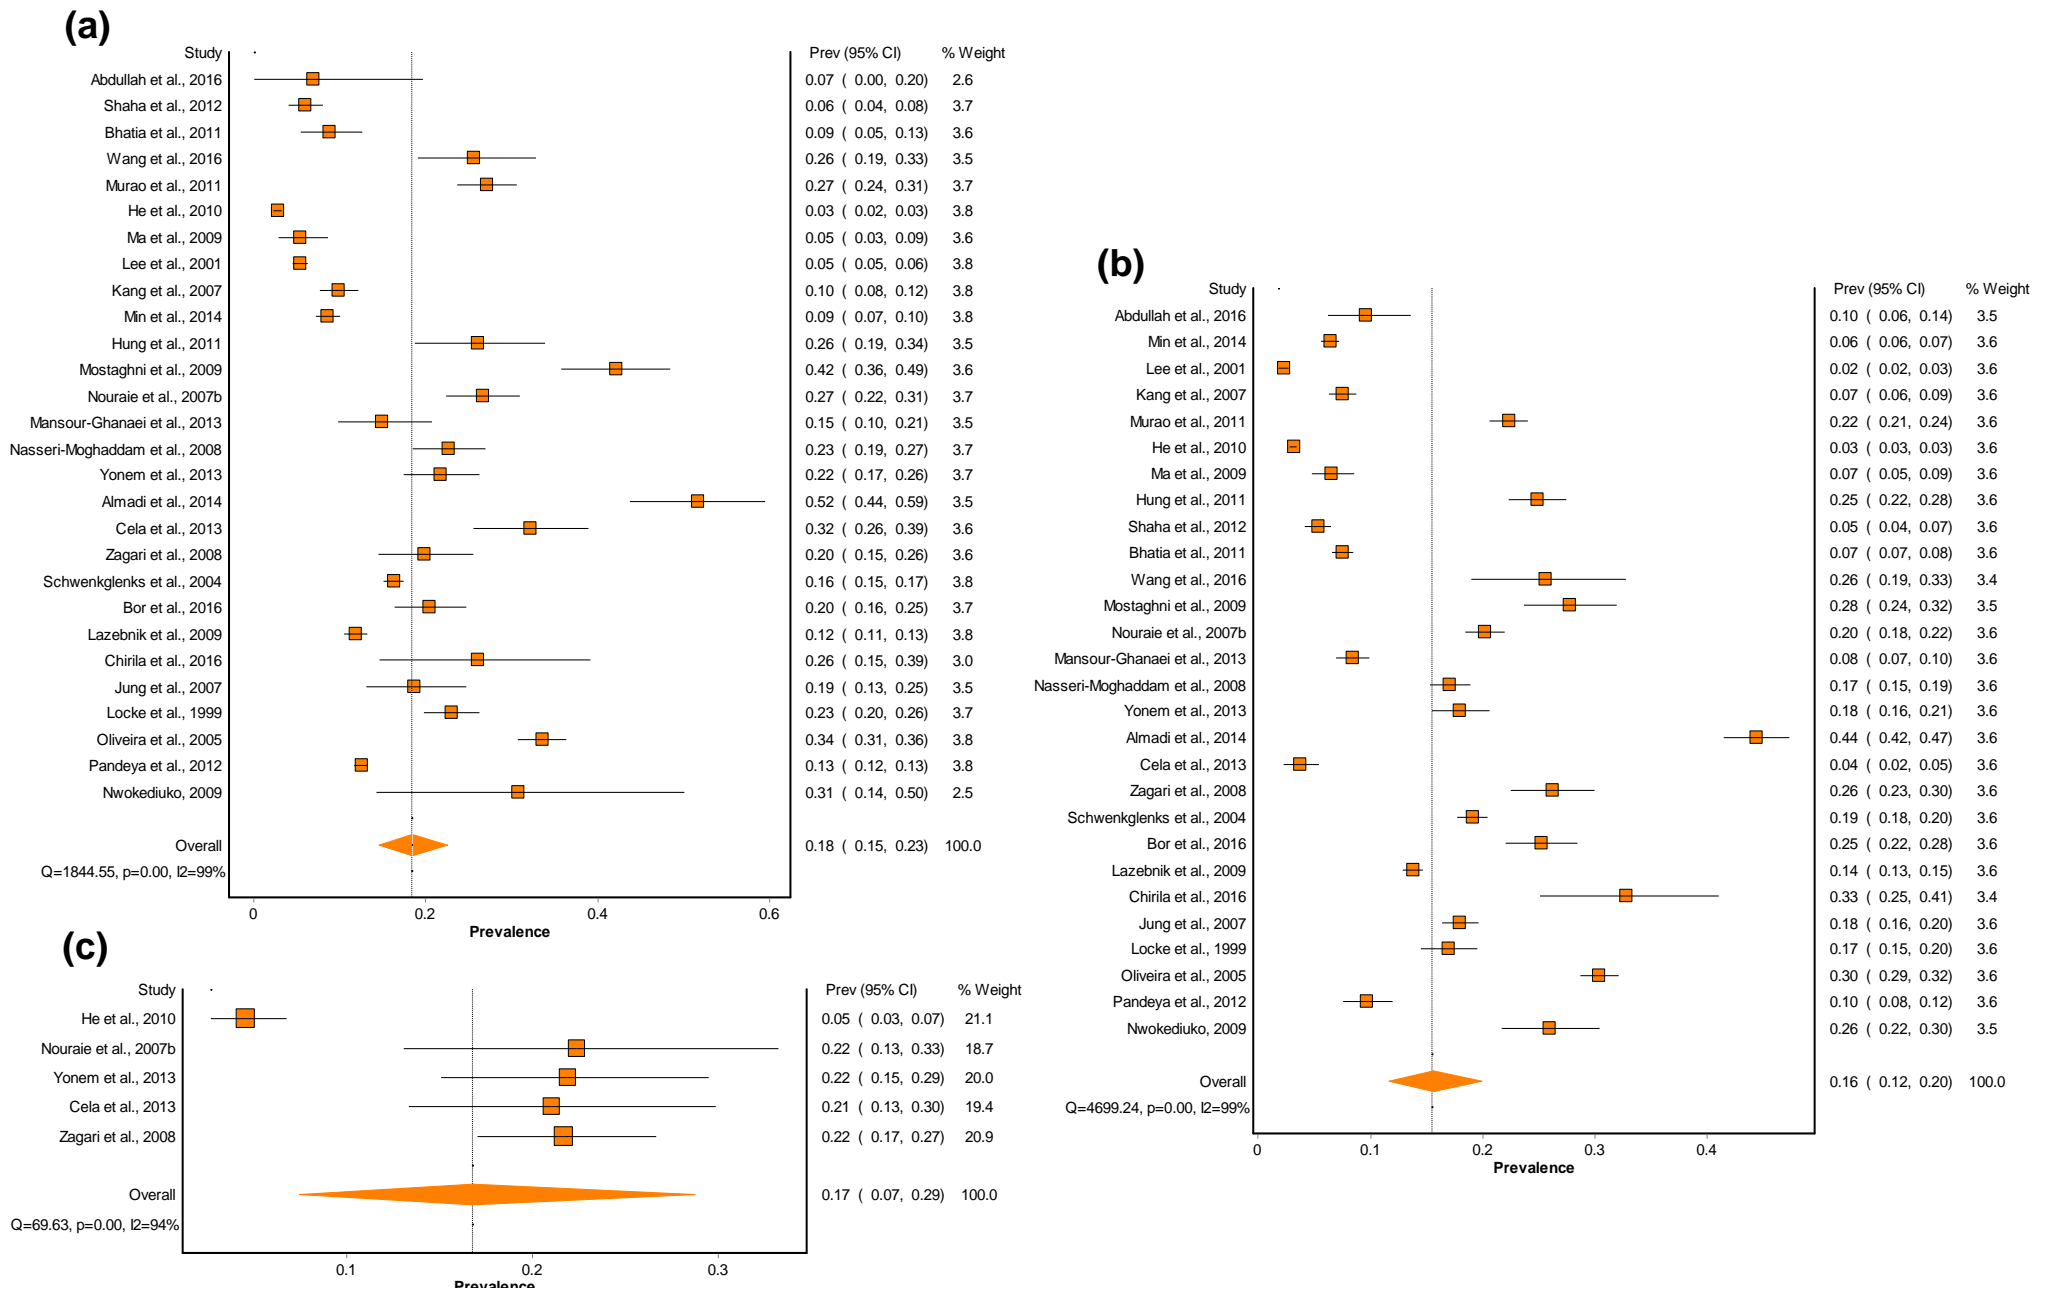

**Figure S23.** Forest plots showing global prevalence of GORD according to smoking habits with studies pooled using a random effects model. (a) Current smokers. (b) Non-smokers. (c) Ex-smokers.

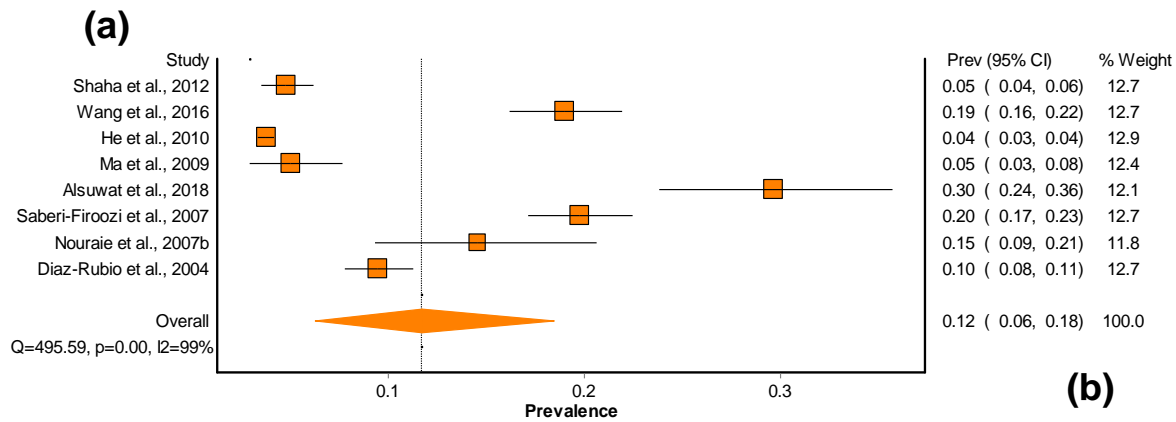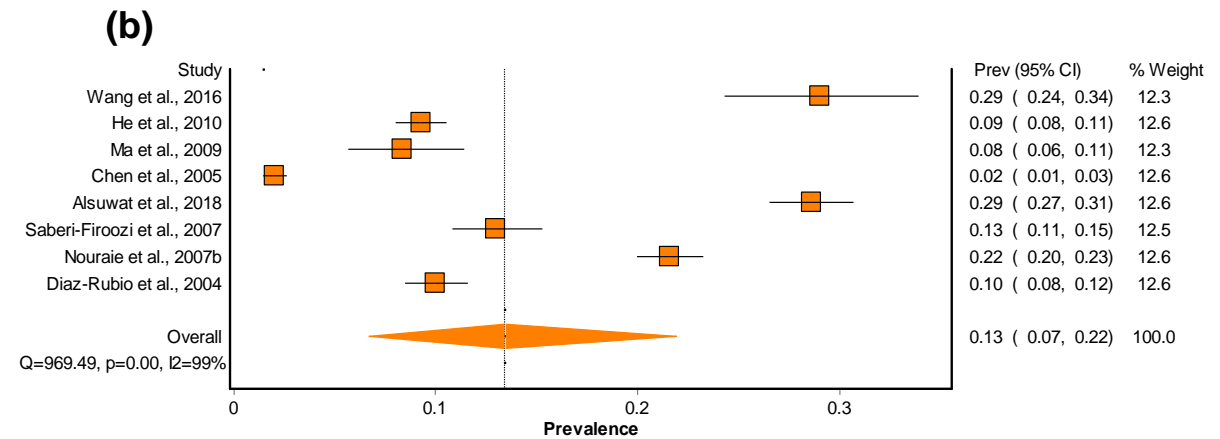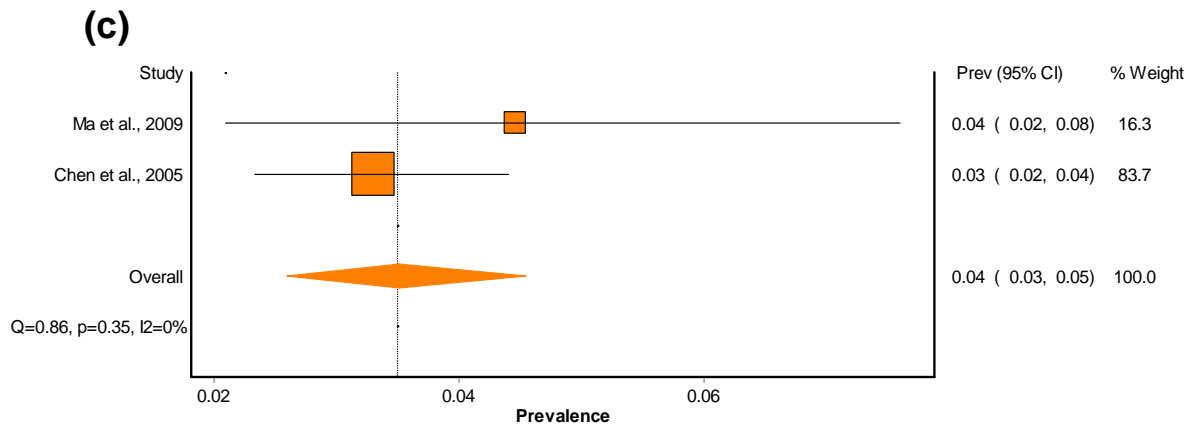

**Figure S24.** Forest plots showing global prevalence of GORD according to area of domicile with studies pooled using a random effects model.  
 (a) Rural.  
 (b) Urban.  
 (c) Suburban.

(a)

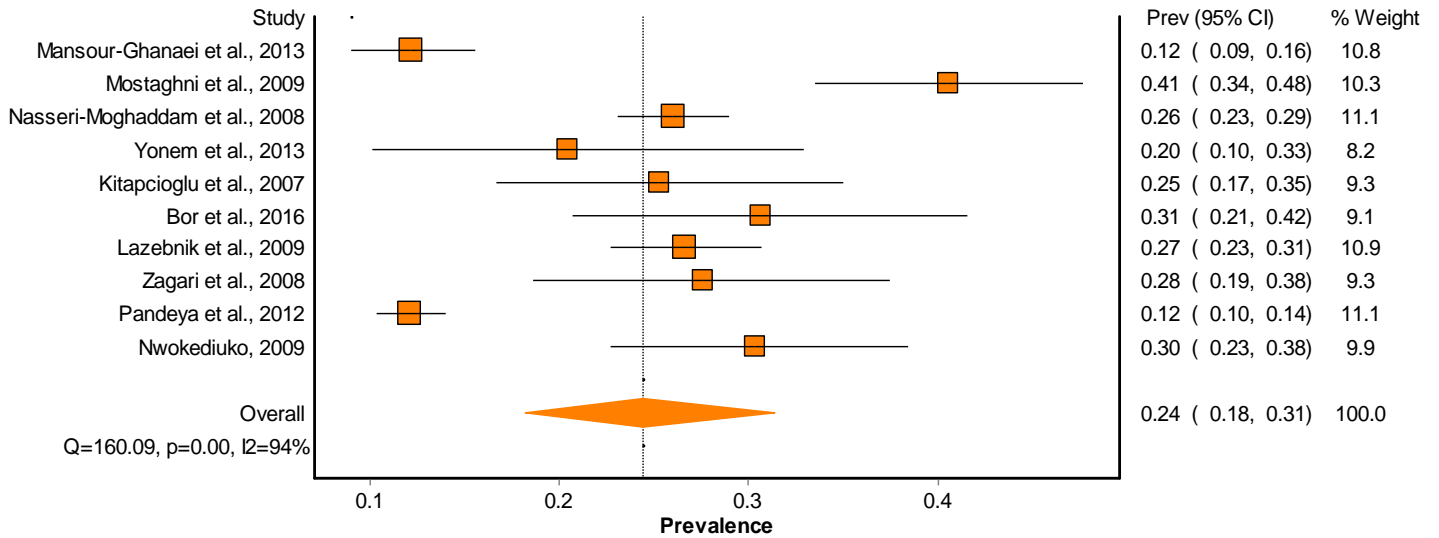

(b)

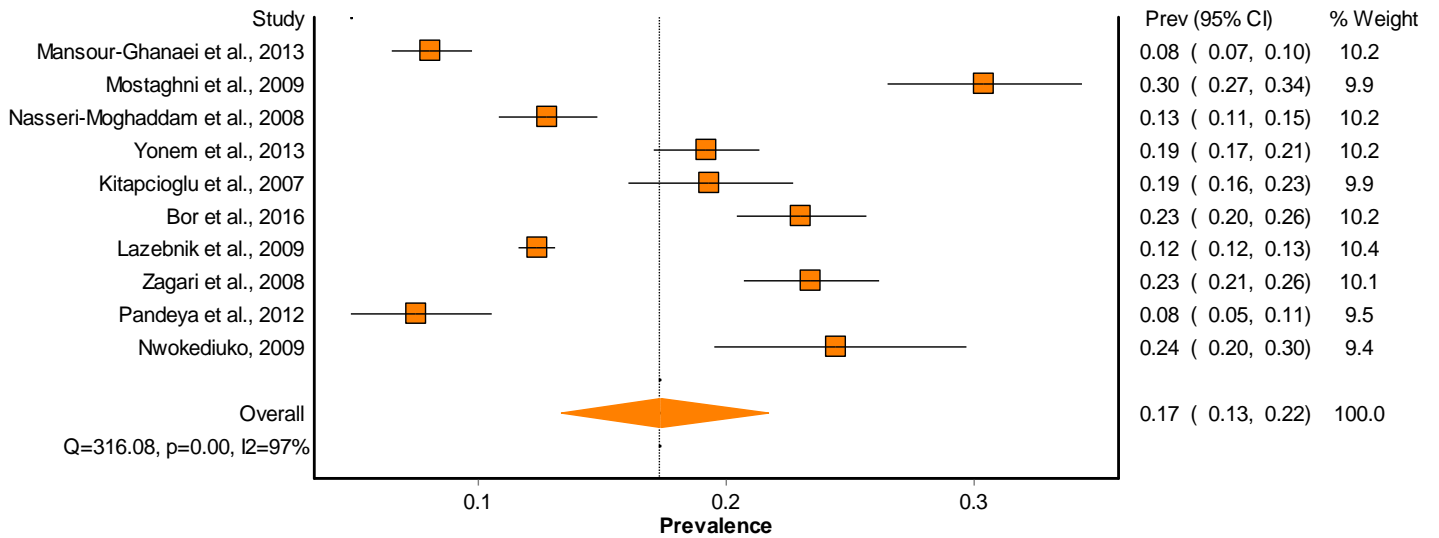

**Figure S25.** Forest plots showing global prevalence of GORD according to NSAIDs/aspirin use with studies pooled using a random effects model.

(a) NSAIDs/aspirin users.

(b) NSAIDs/aspirin non-users.

(a)

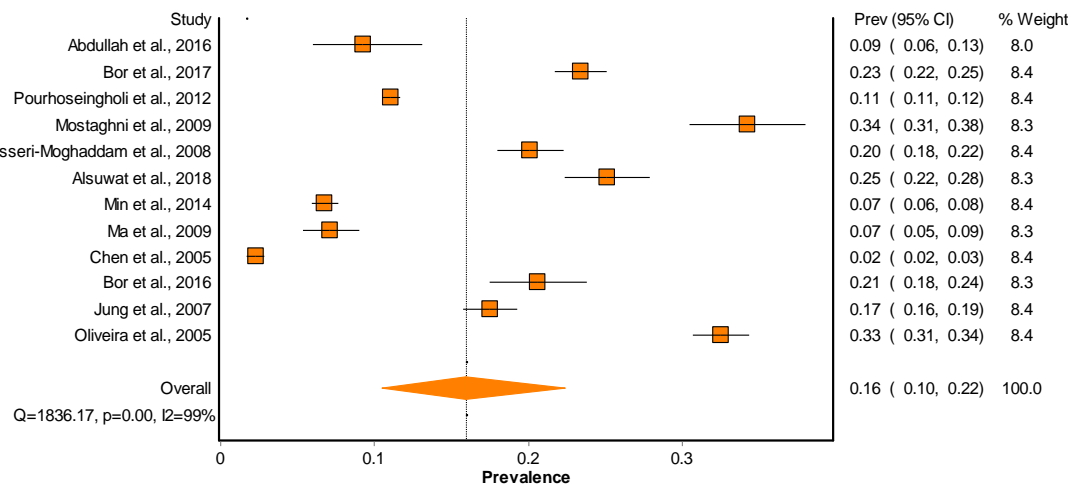

(b)

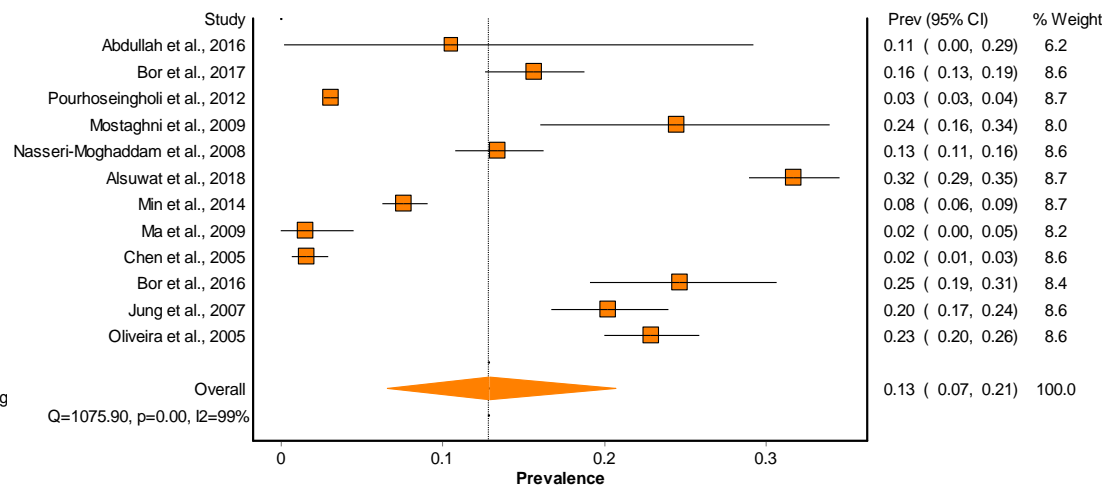

(c)

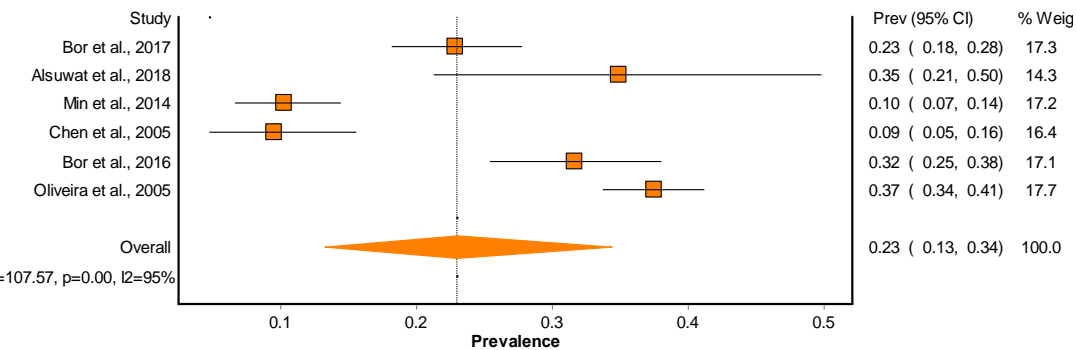

**Figure S26.** Forest plots showing global prevalence of GORD according to marriage status with studies pooled using a random effects model.

- (a) Married.
- (b) Single.
- (c) Divorced.

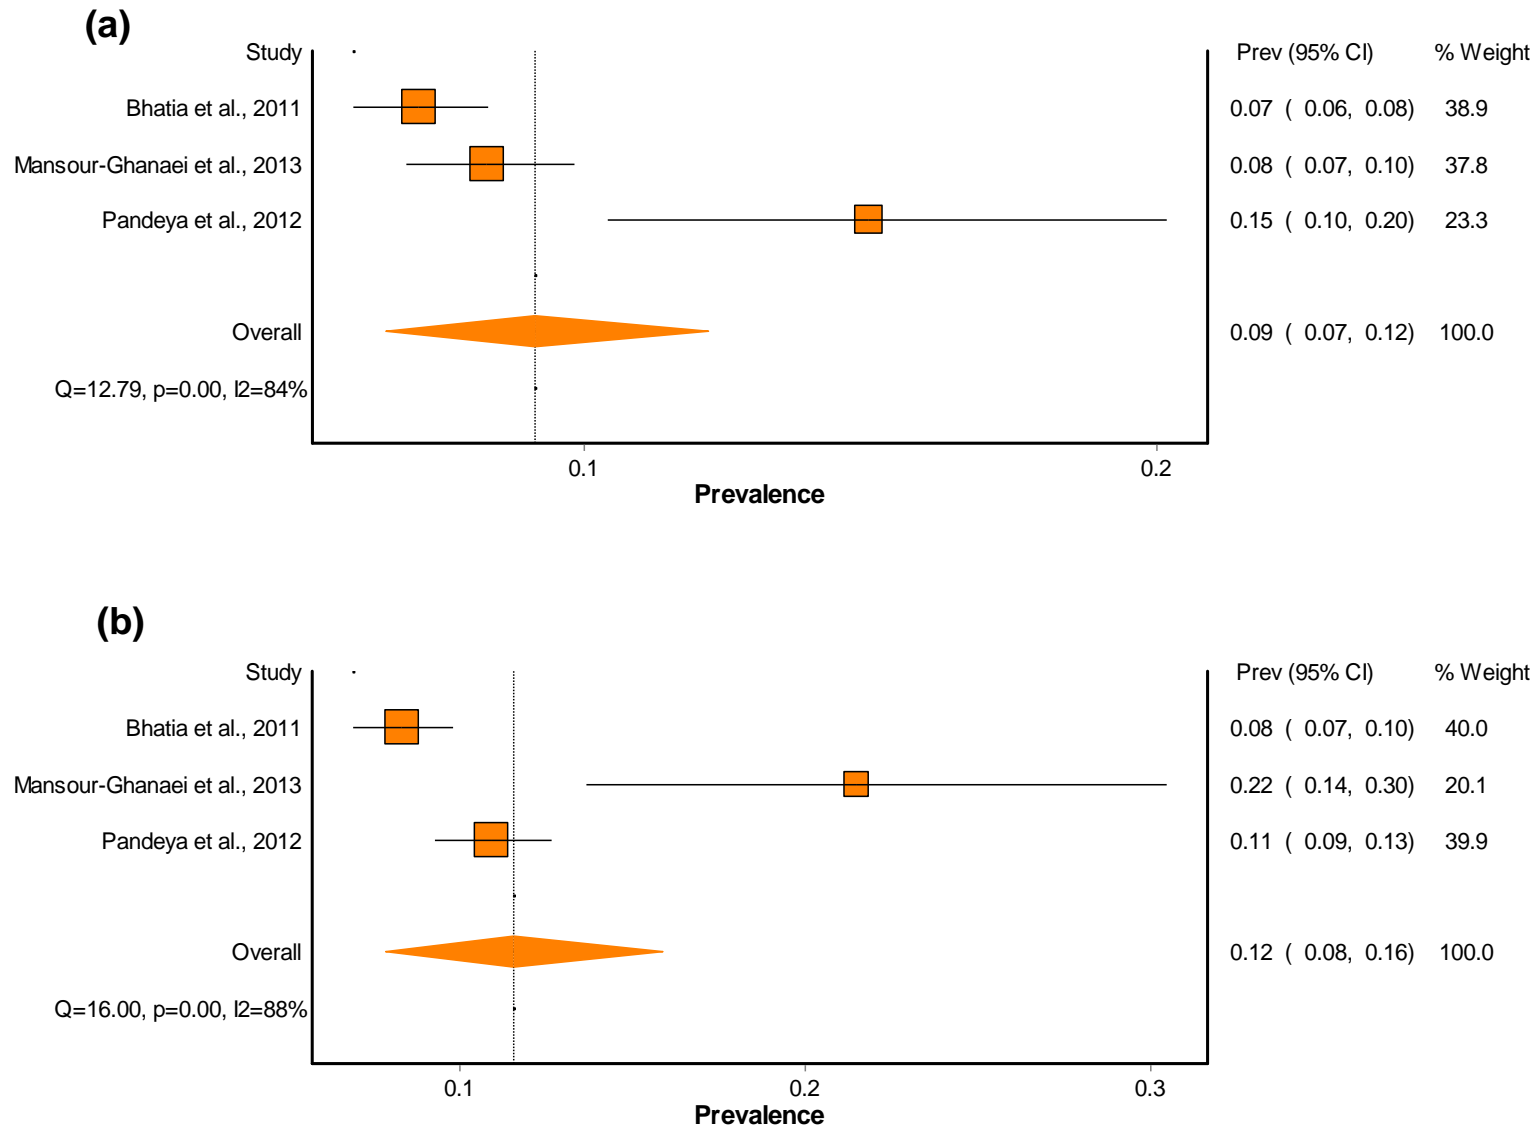

**Figure S27.** Forest plot showing global prevalence of GORD according to intake of spicy food with studies pooled using a random effects model.

(a) Low intake.

(b) High intake.

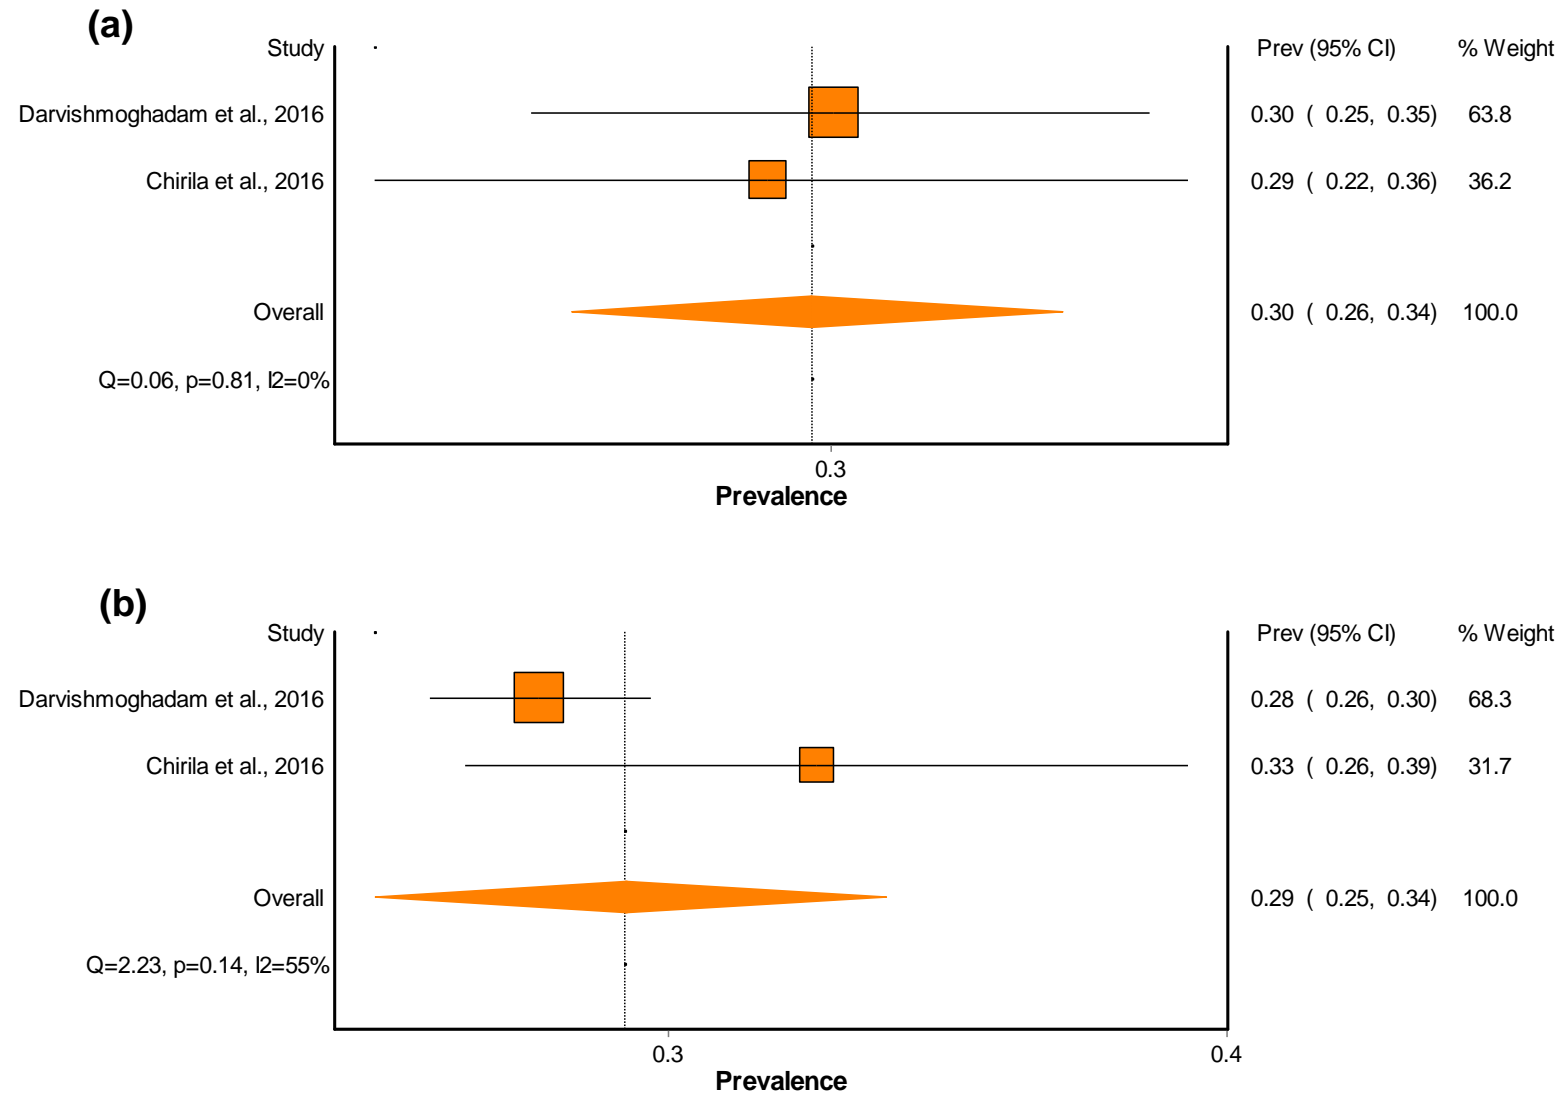

**Figure S28.** Forest plot showing global prevalence of GORD according to intake of sweet food with studies pooled using a random effects model.

- (a) Low intake.
- (b) High intake.

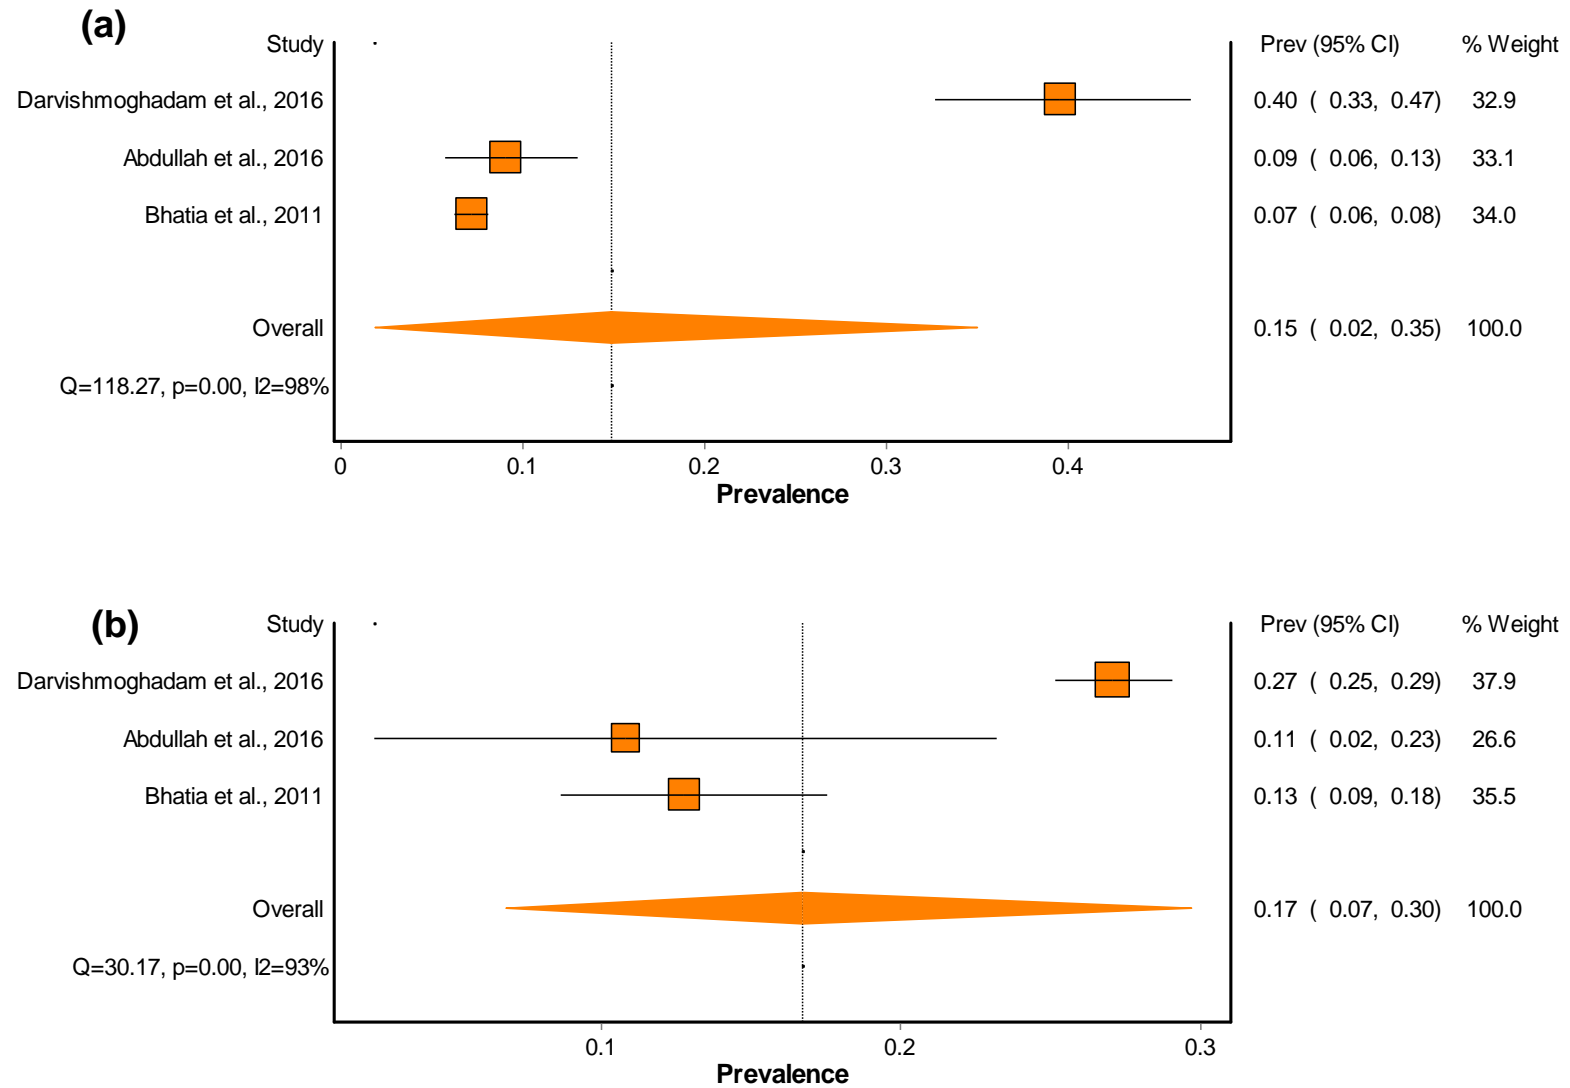

**Figure S29.** Forest plot showing global prevalence of GORD according to intake of meat/fish with studies pooled using a random effects model.  
 (a) Low intake.  
 (b) High intake.



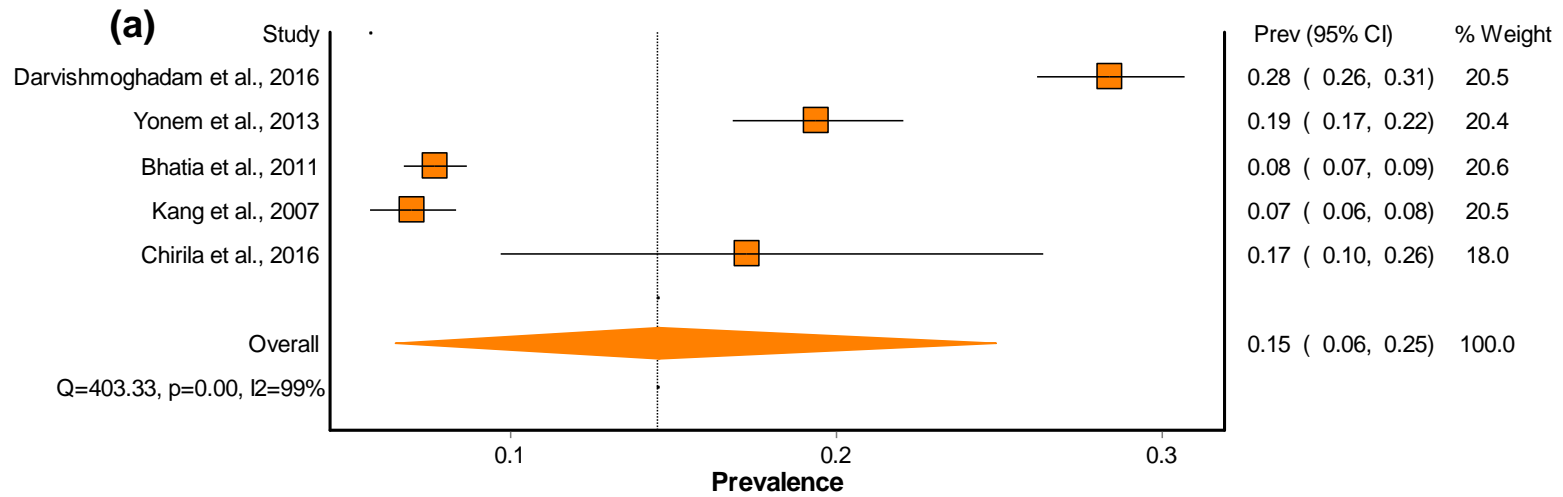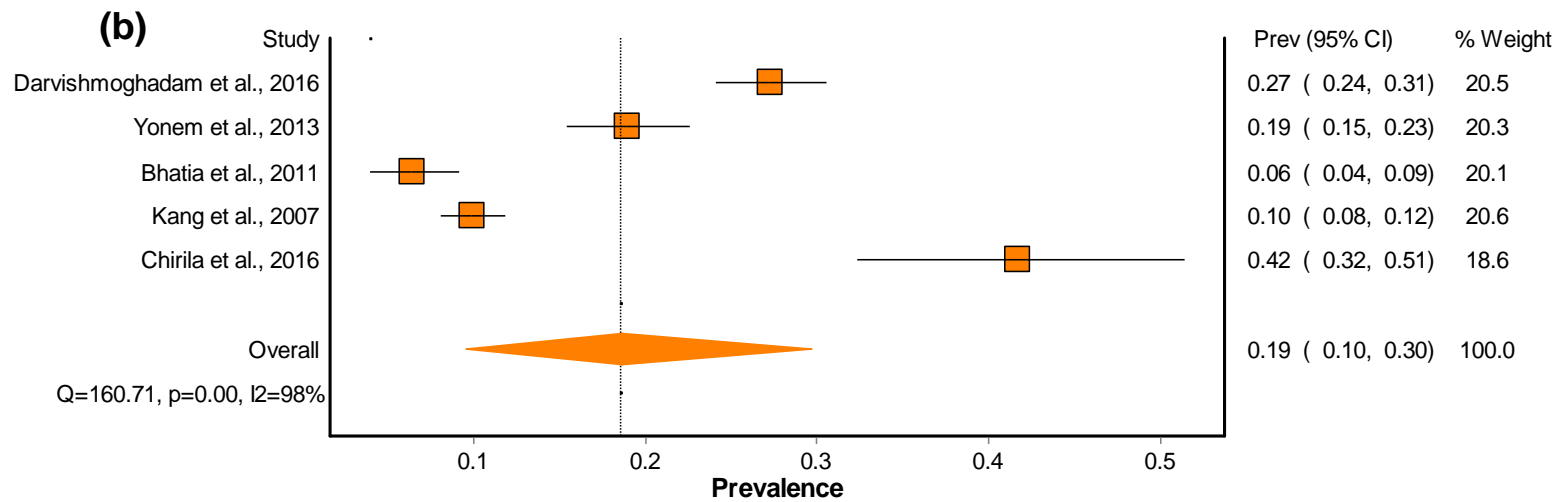

**Figure S30.** Forest plot showing global prevalence of GORD according to intake of carbonated drinks with studies pooled using a random effects model.

(a) Low intake.

(b) High intake.

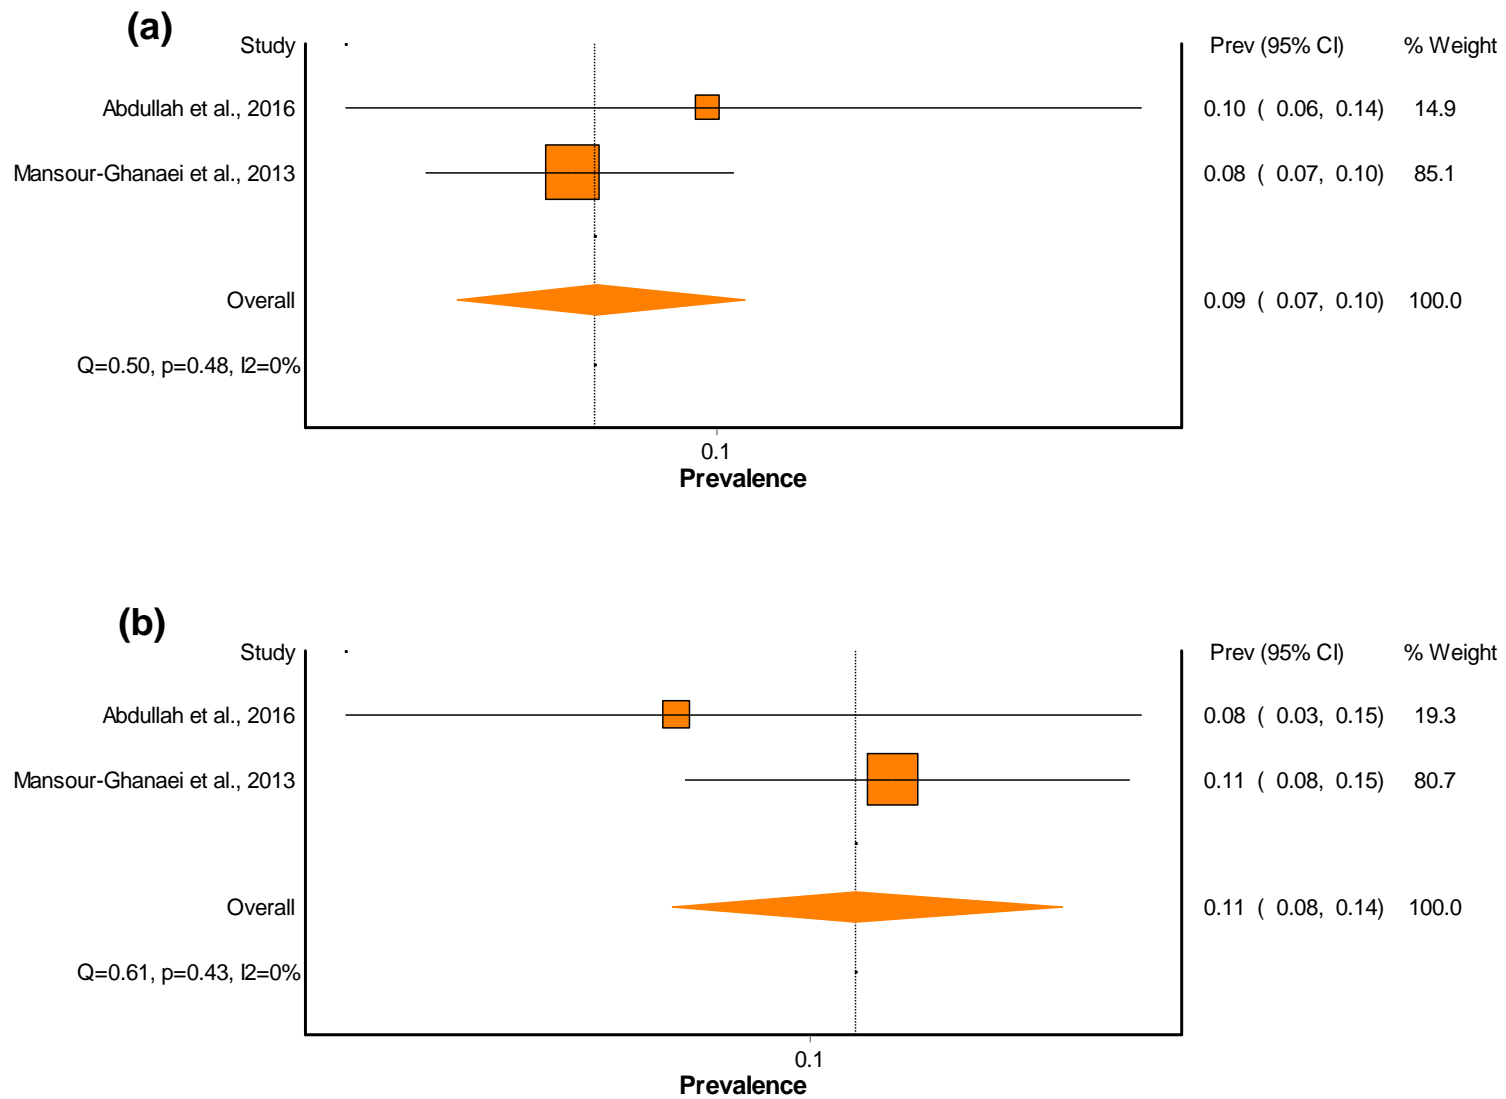

**Figure S31.** Forest plot showing global prevalence of GORD according to intake of fatty food with studies pooled using a random effects model.

(a) Low intake.

(b) High intake.

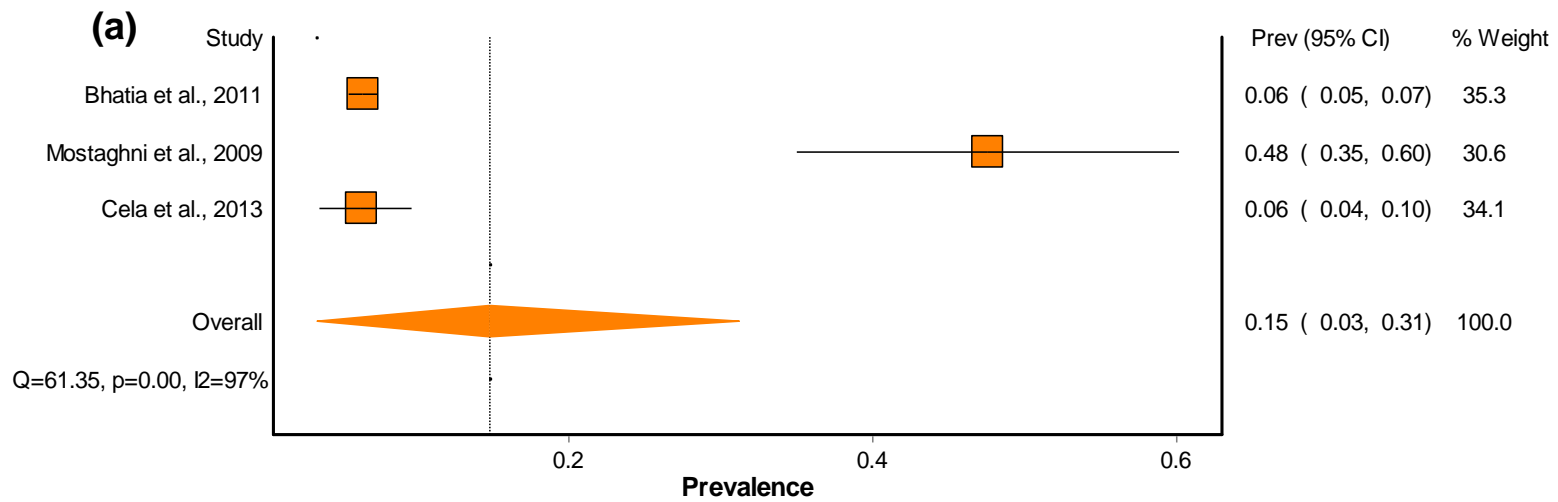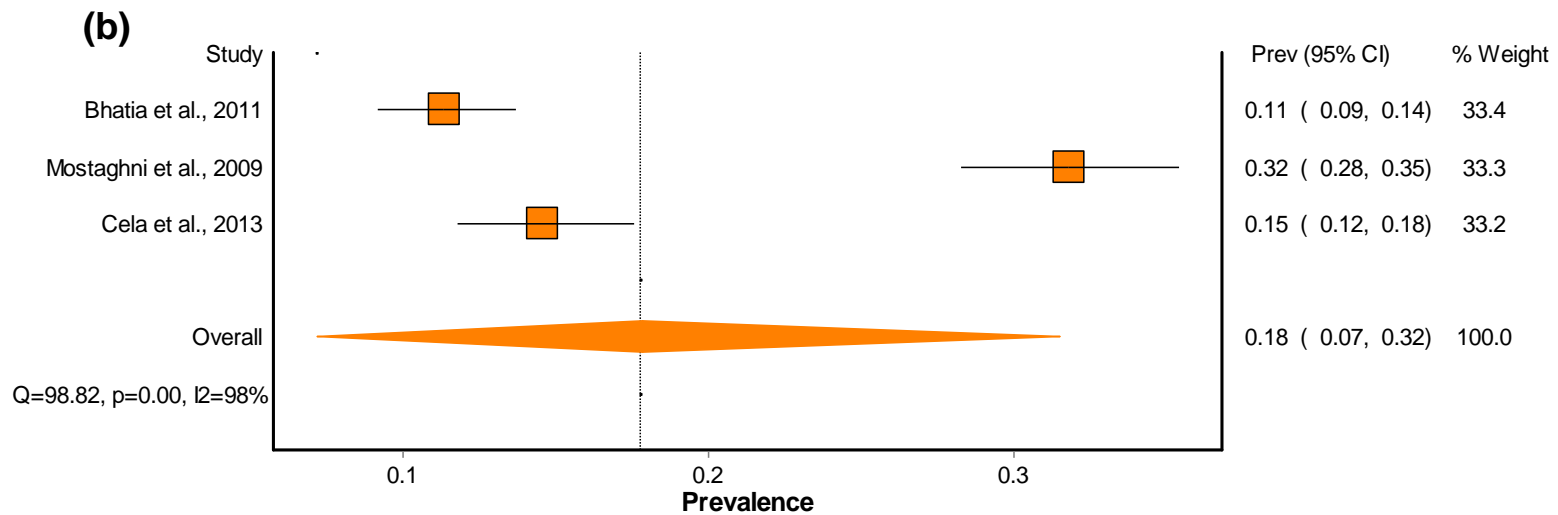

**Figure S32.** Forest plot showing global prevalence of GORD according to intake of fried food with studies pooled using a random effects model.

(a) Low intake.

(b) High intake.

(a)

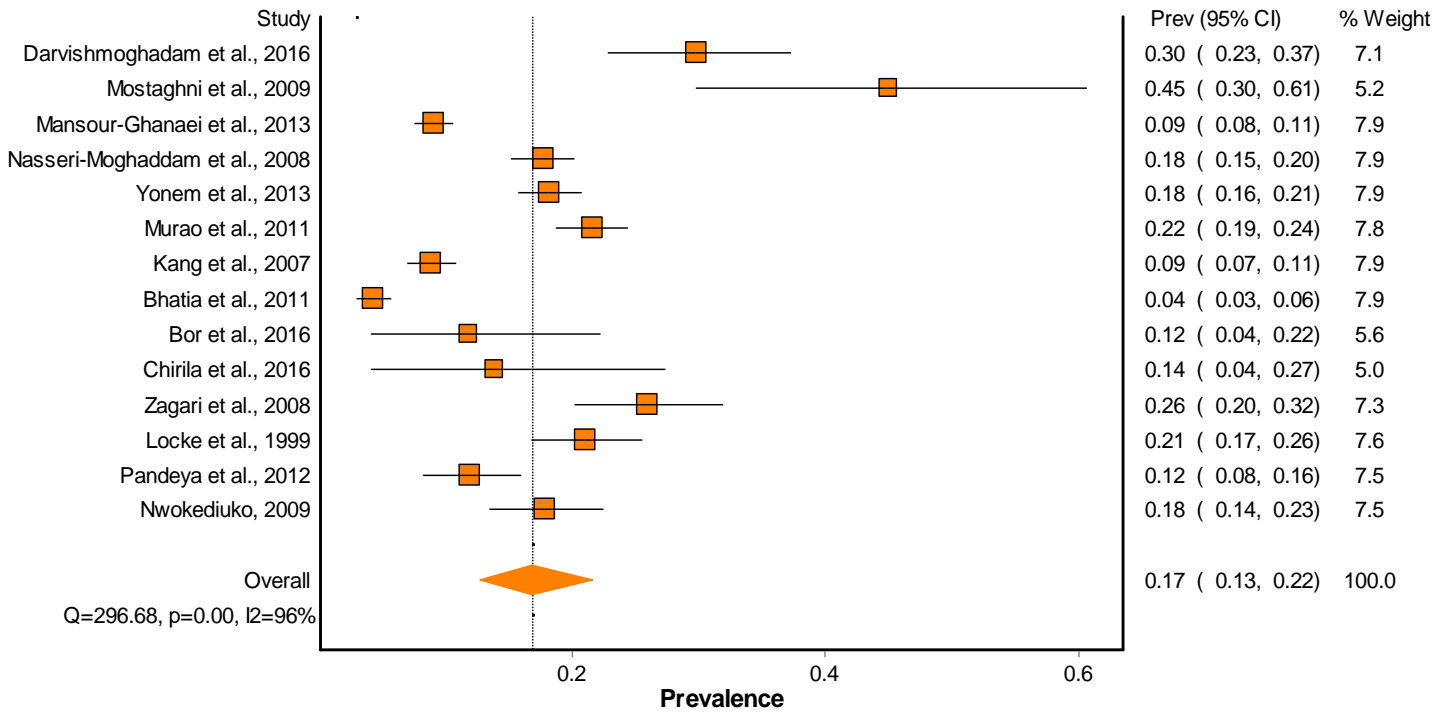

(b)

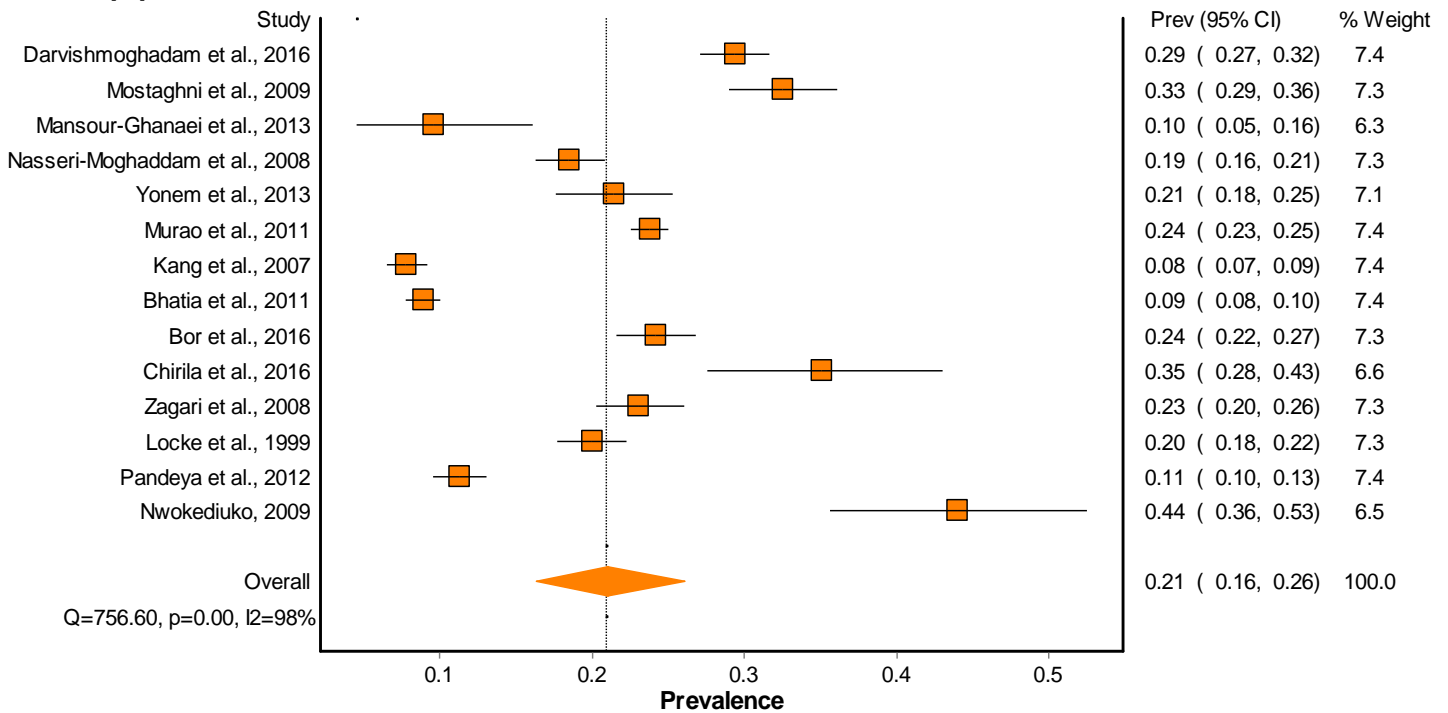

**Figure S33.** Forest plot showing global prevalence of GORD according to intake of coffee/tea with studies pooled using a random effects model.

(a) Low intake.

(b) High intake.

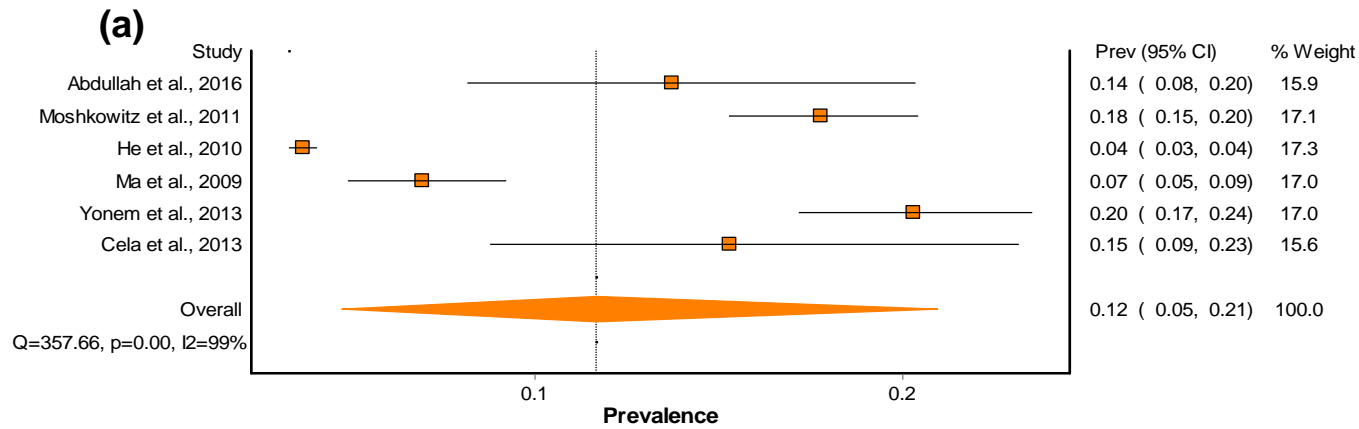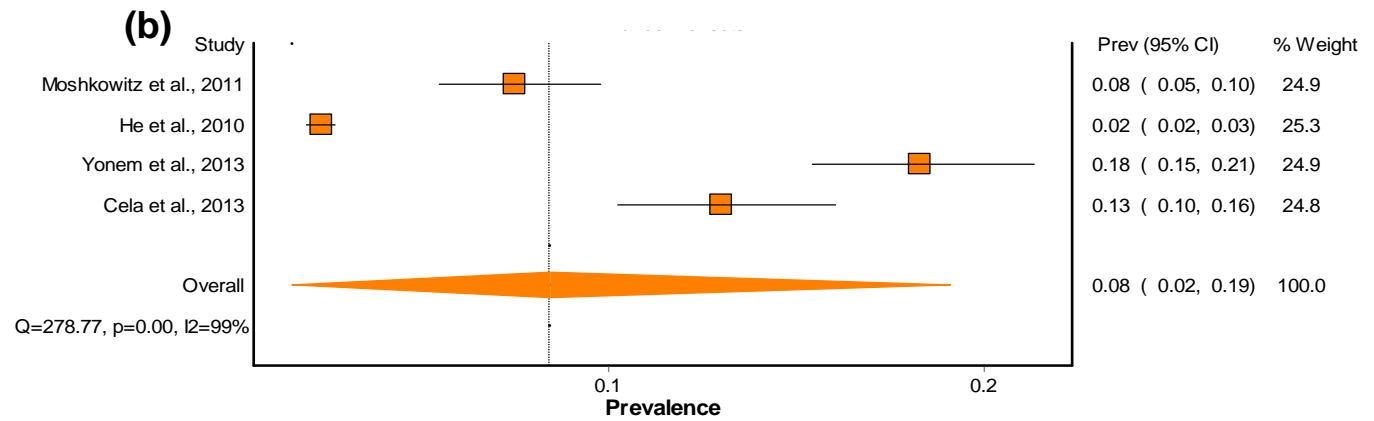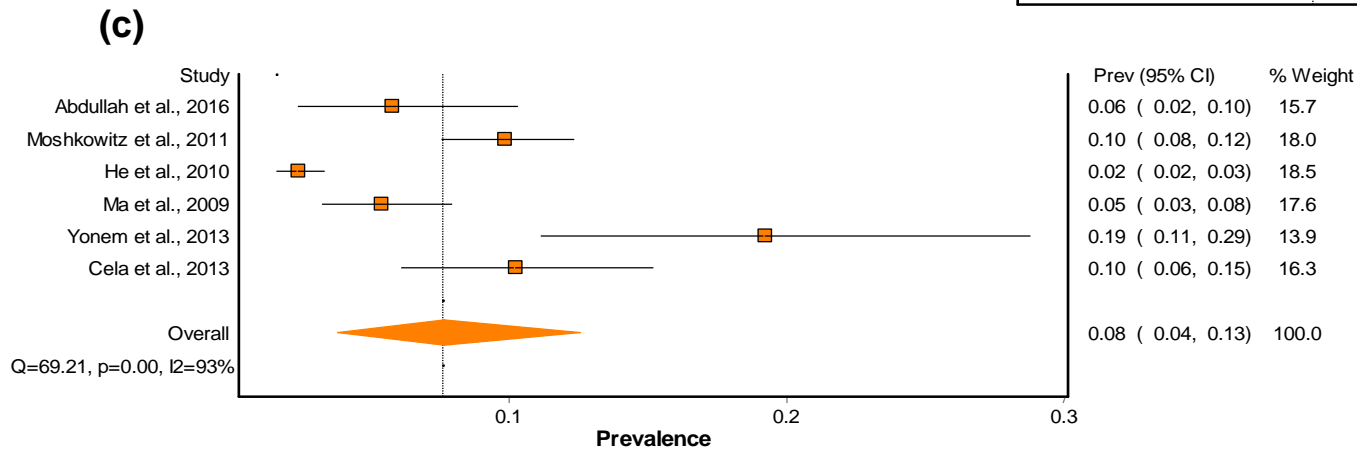

**Figure S34.** Forest plot showing global prevalence of GORD according to income level with studies pooled using a random effects model.  
 (a) Low income.  
 (b) Medium income.  
 (c) High income.

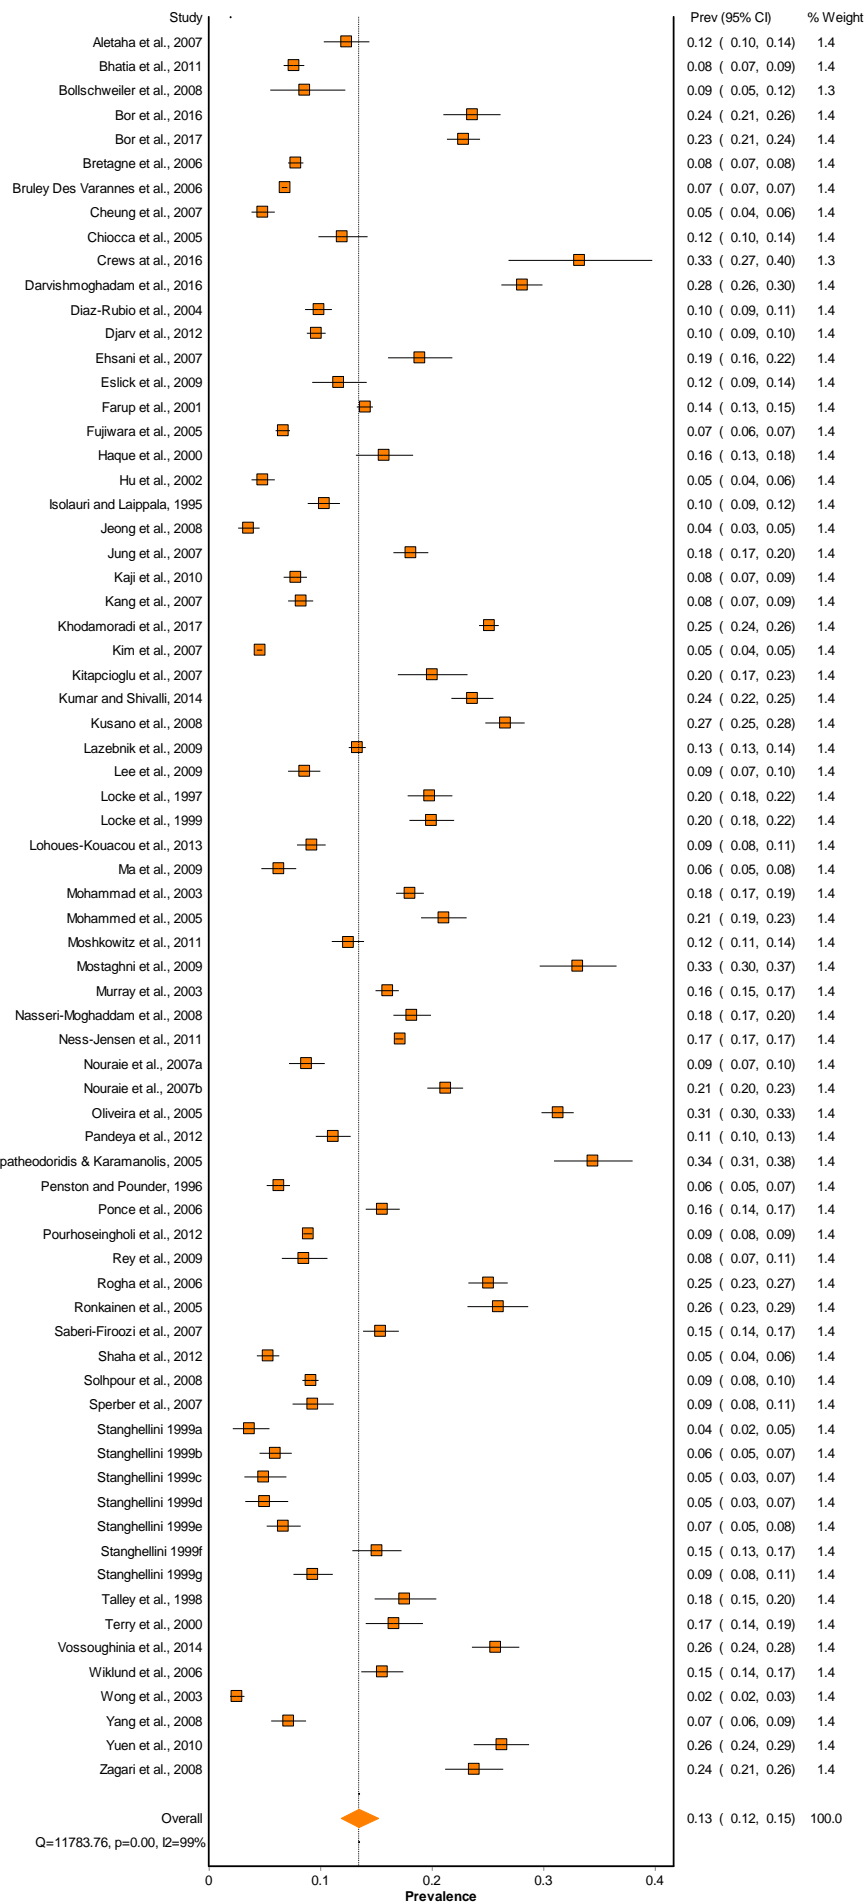

**Figure S35.** Forest plot showing global prevalence of GORD according to studies using a GORD definition of heartburn and/or acid regurgitation at least once a week with studies pooled using a random effects model.

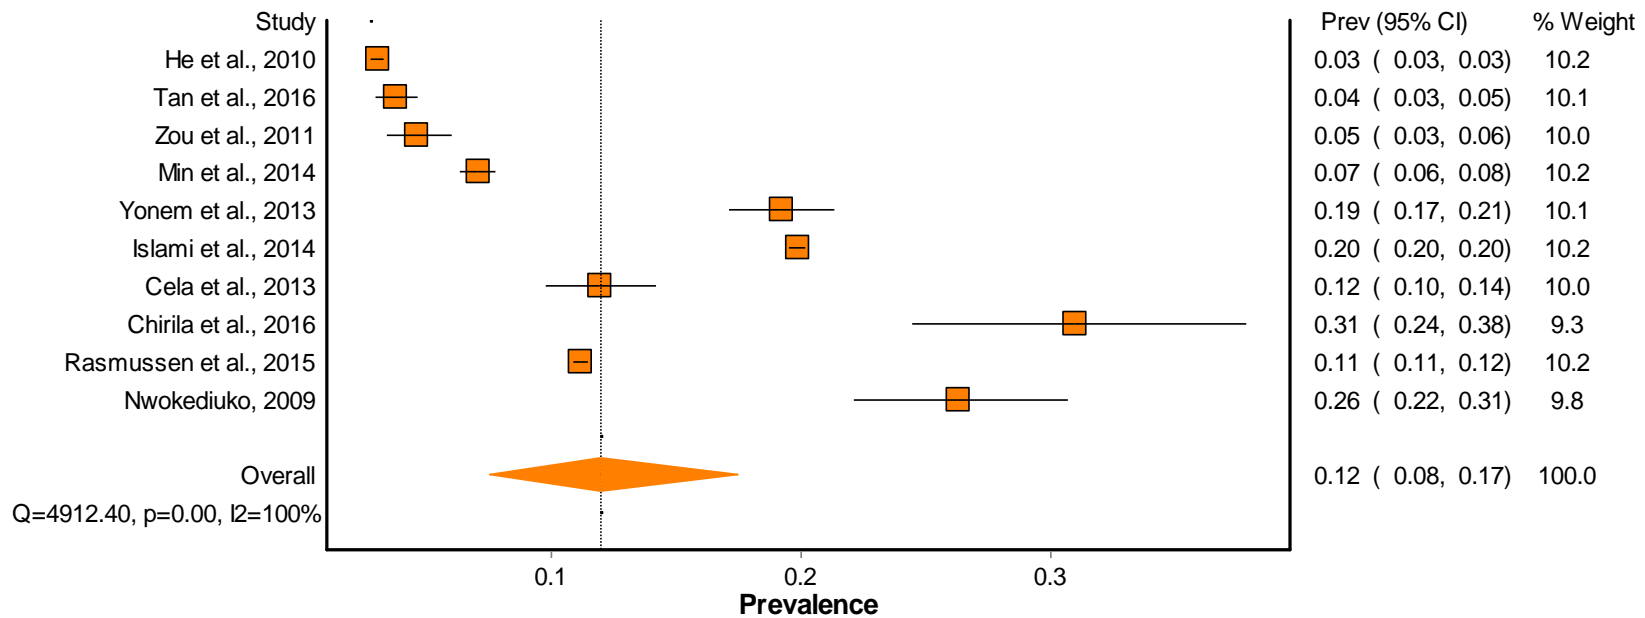

**Figure S36.** Forest plot showing global prevalence of GORD according to studies using the Montreal definition to define GORD with studies pooled using a random effects model.

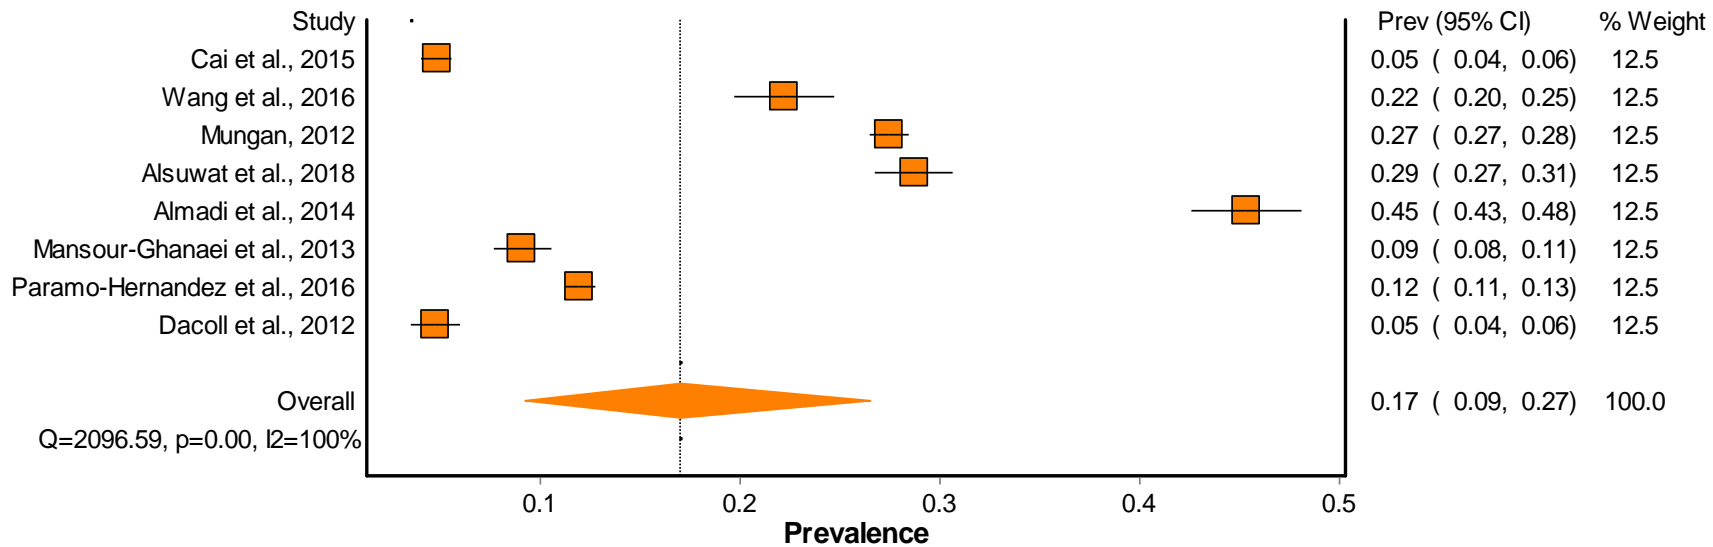

**Figure S37.** Forest plot showing global prevalence of GORD according to studies using a GERDQ score of at least 8 to define GORD with studies pooled using a random effects model.



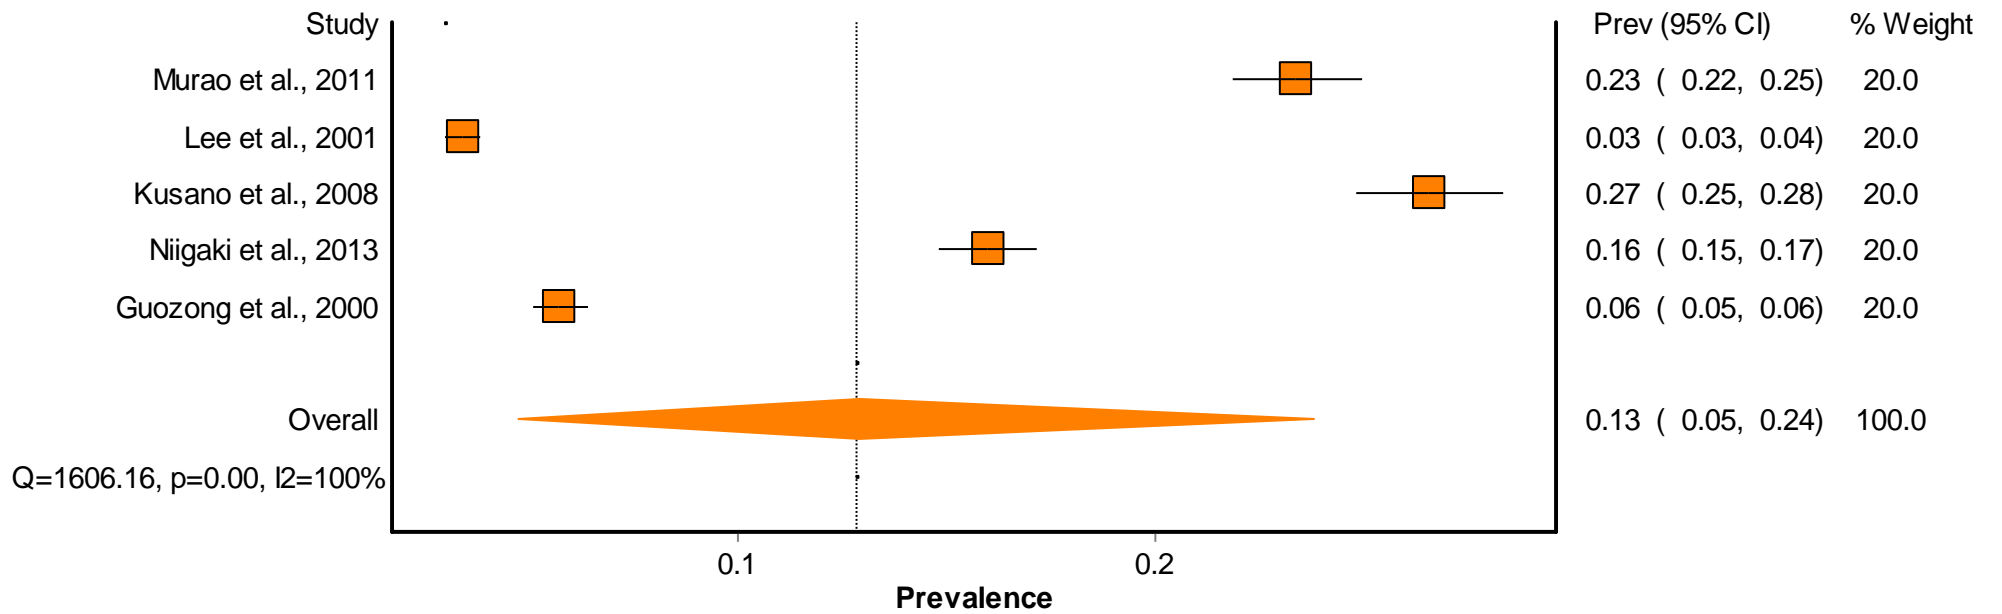

**Figure S38.** Forest plot showing global prevalence of GORD according to studies using endoscopically proven GORD to define GORD with studies pooled using a random effects model.

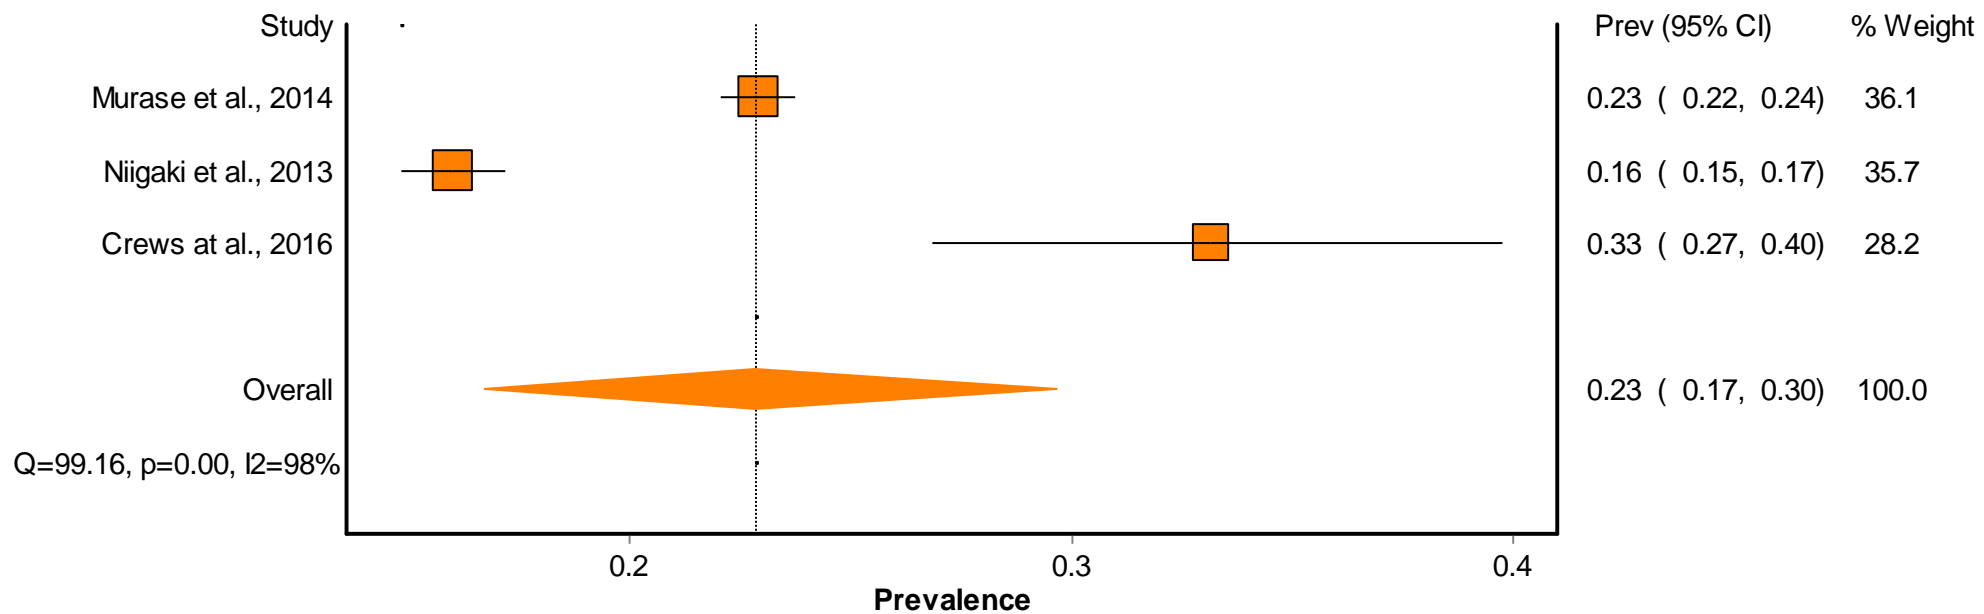

**Figure S39.** Forest plot showing global prevalence of GORD according to studies defining GORD cases as those currently undergoing treatment for GORD with studies pooled using a random effects model.

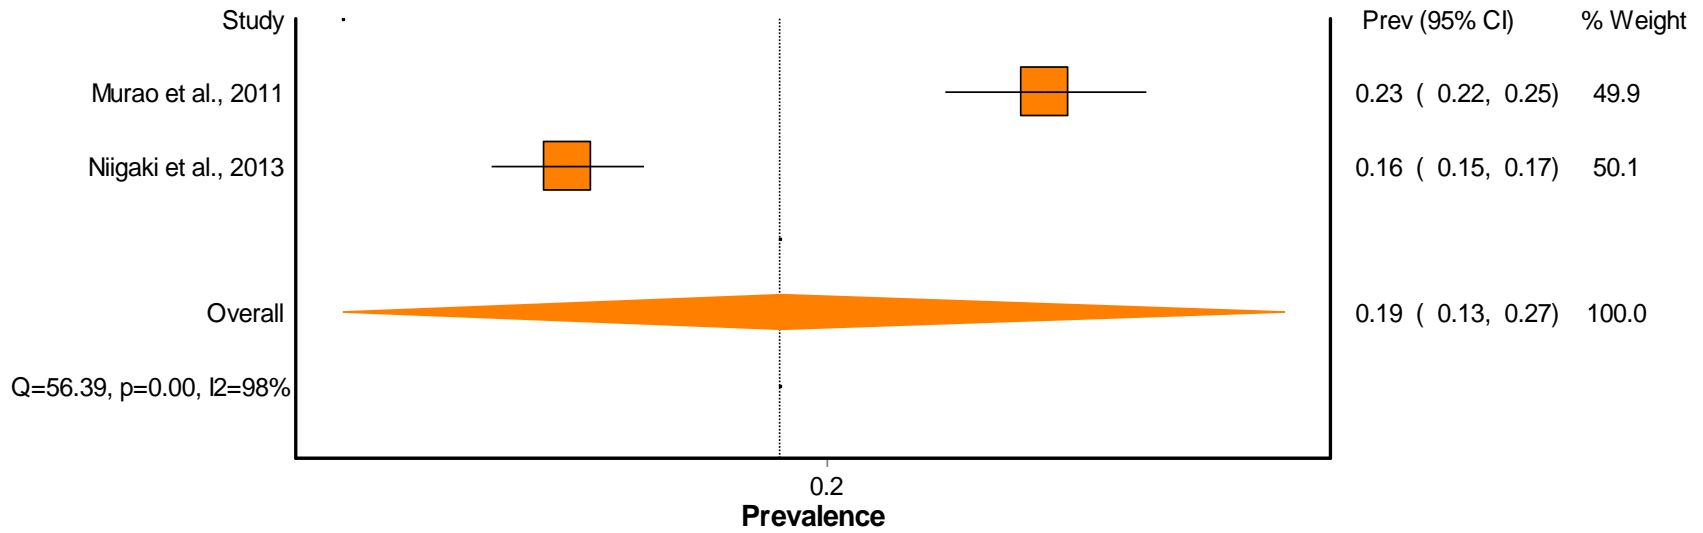

**Figure S40.** Forest plot showing global prevalence of GORD according to studies using a QUEST score of at least 6 to define GORD with studies pooled using a random effects model.

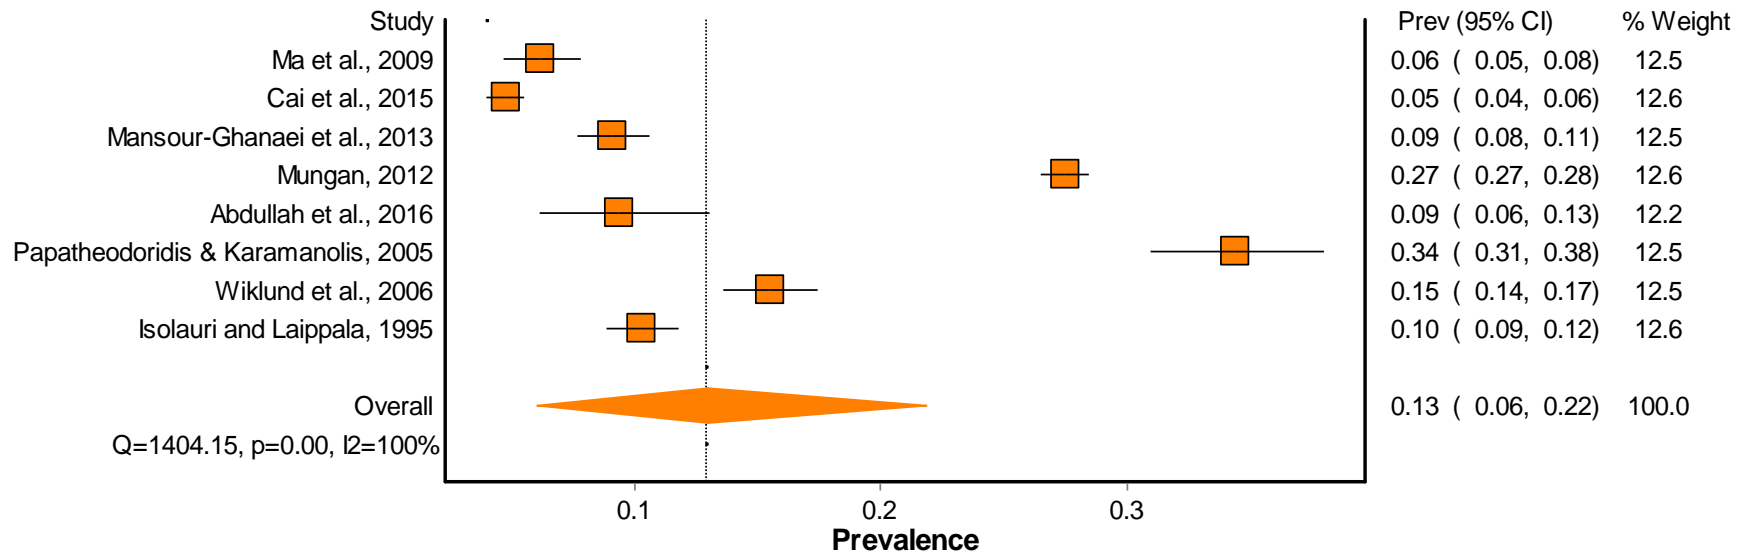

**Figure S41.** Forest plot showing global prevalence of GORD according to studies investigating GORD symptoms during the previous week with studies pooled using a random effects model.

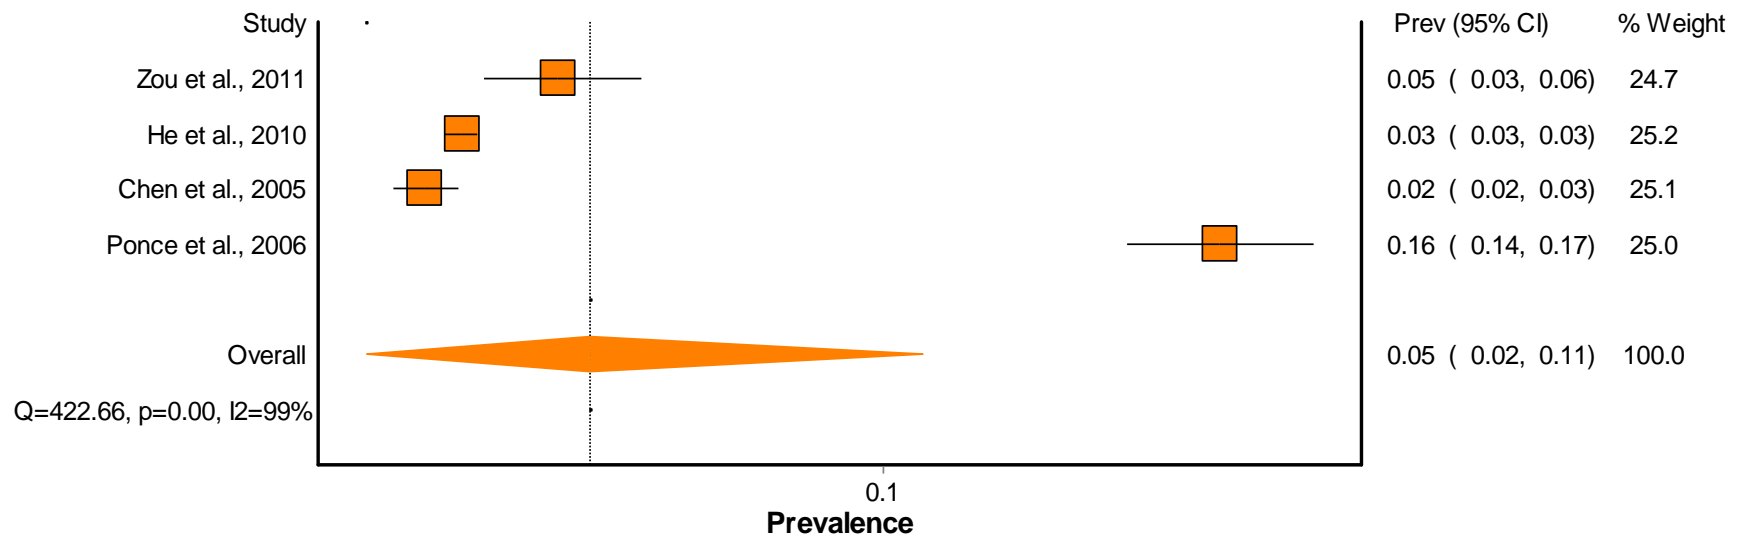

**Figure S42.** Forest plot showing global prevalence of GORD according to studies investigating GORD symptoms during the previous month with studies pooled using a random effects model.

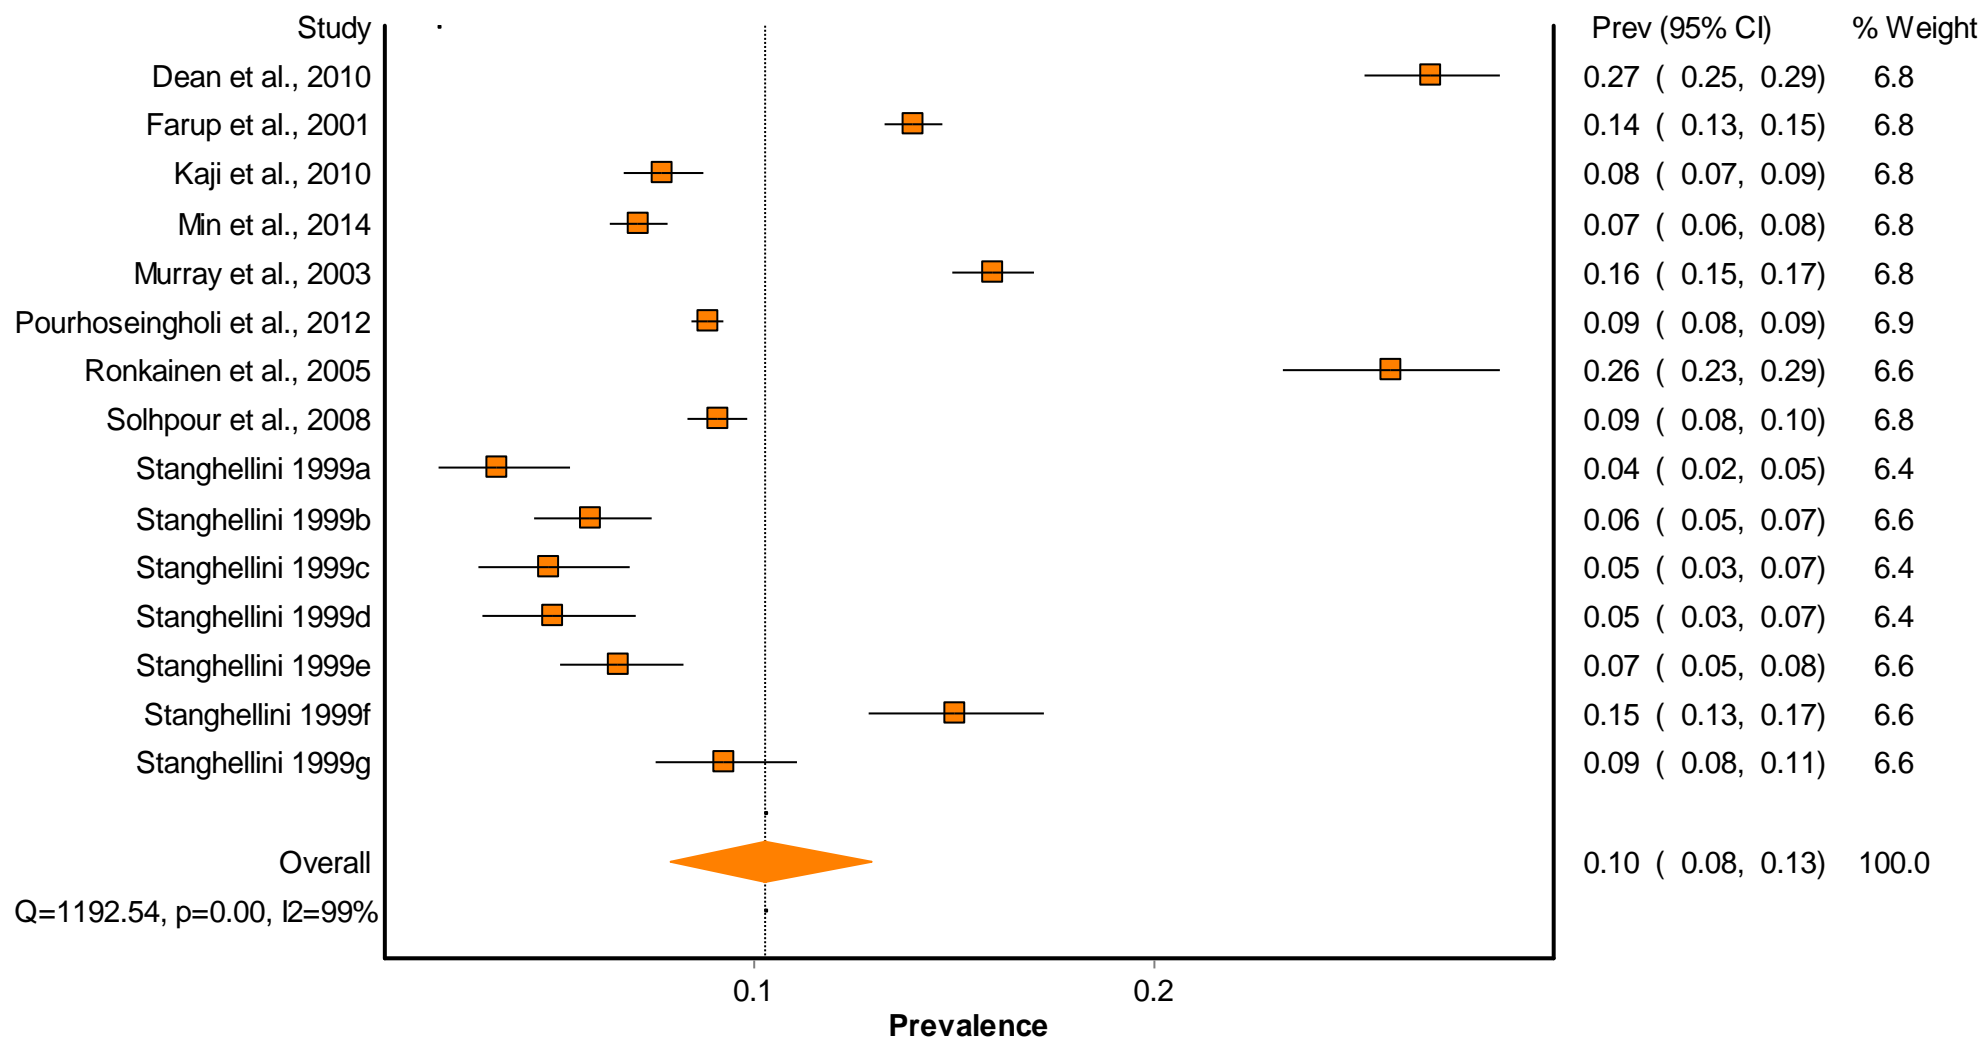

**Figure S43.** Forest plot showing global prevalence of GORD according to studies investigating GORD symptoms during previous 3 months with studies pooled using a random effects model.

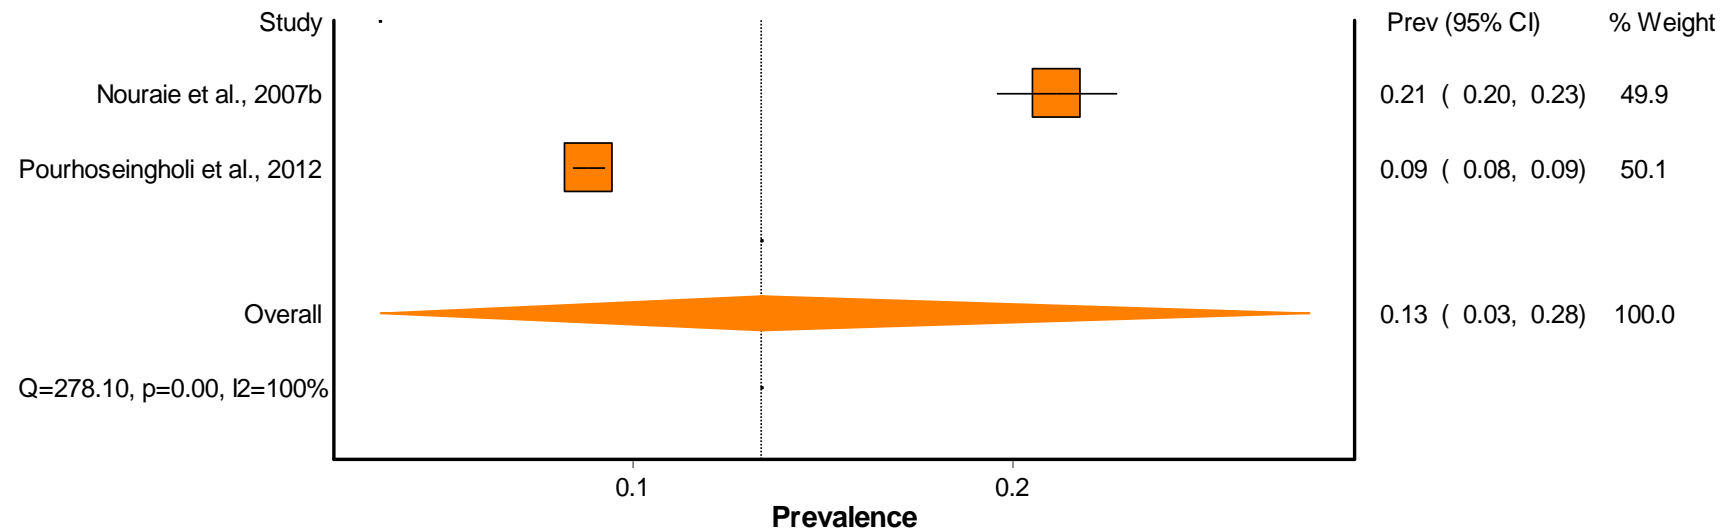

**Figure S44.** Forest plot showing global prevalence of GORD according to studies investigating GORD symptoms during previous 6 months with studies pooled using a random effects model.

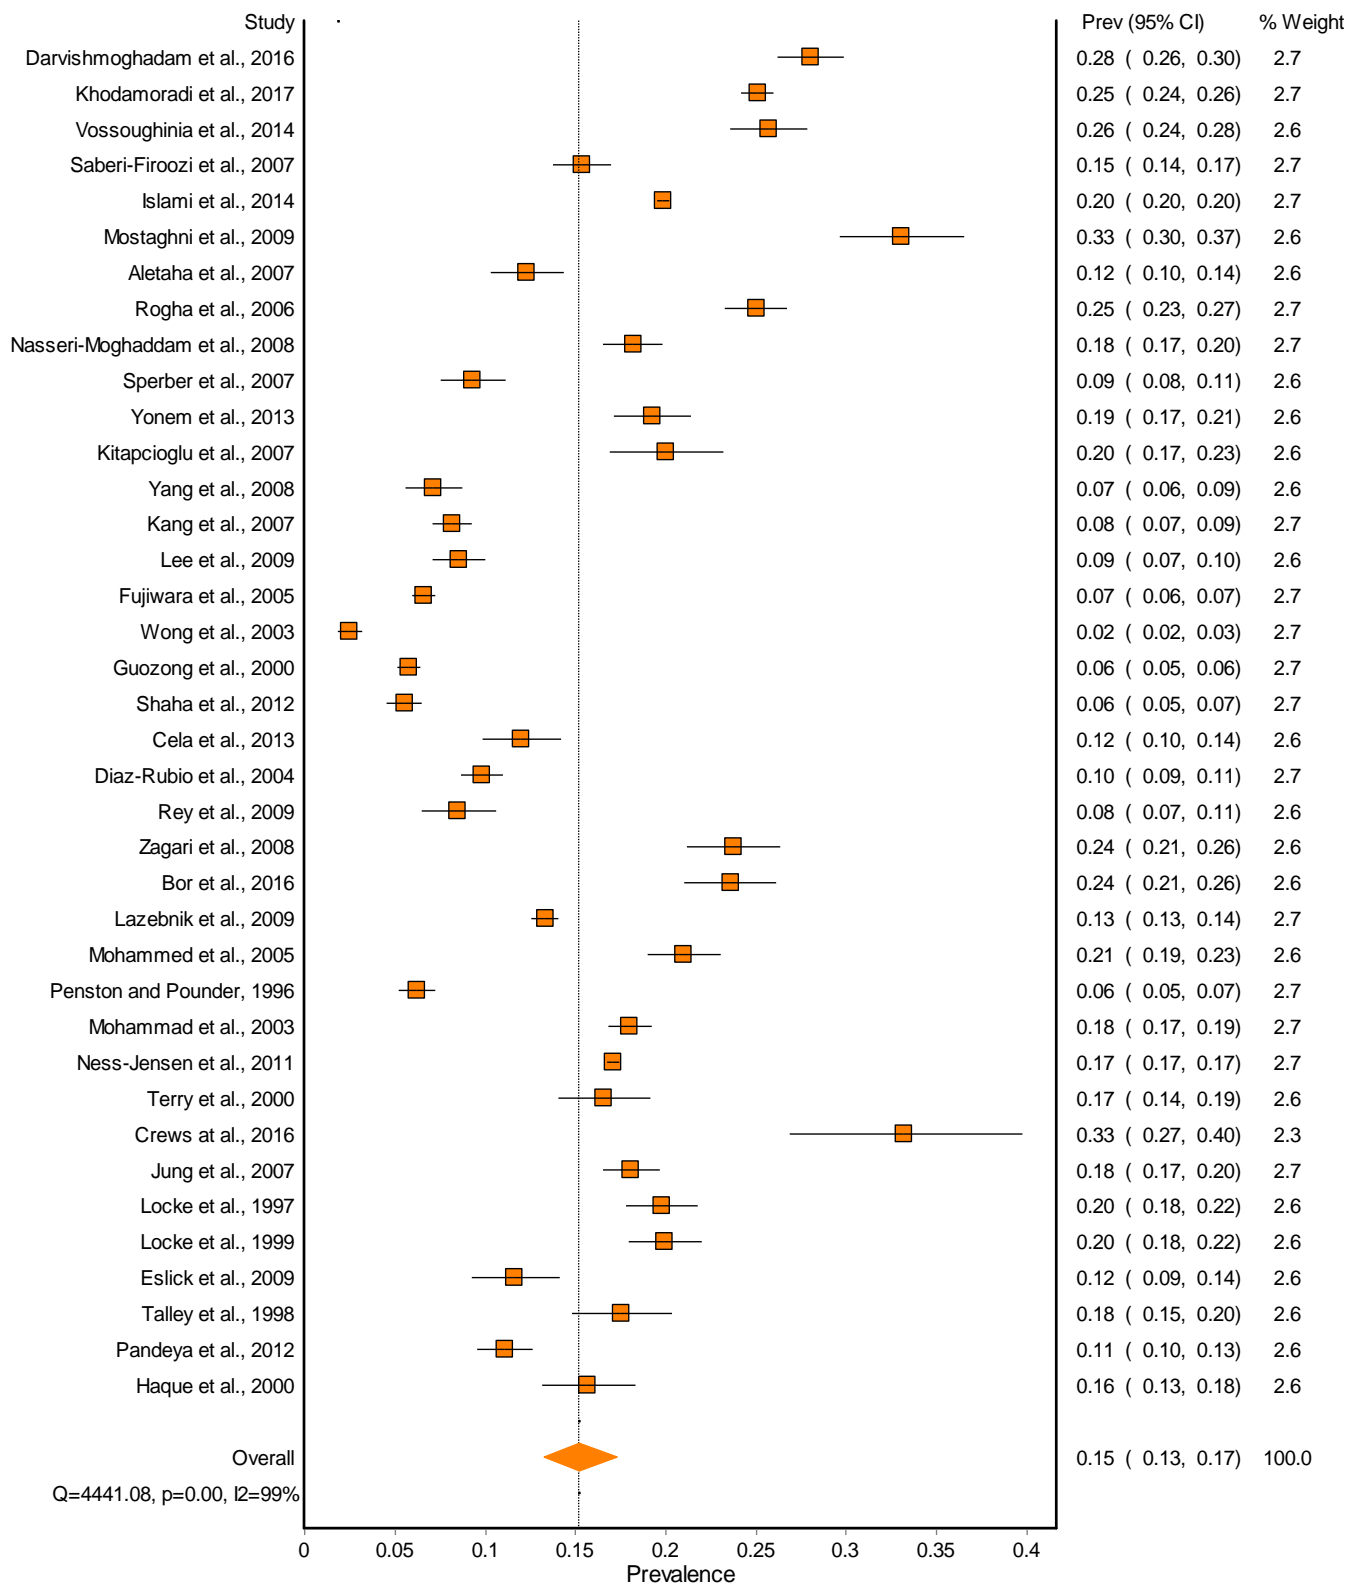

**Figure S45.** Forest plot showing global prevalence of GORD according to studies investigating GORD symptoms during previous 12 months with studies pooled using a random effects model.



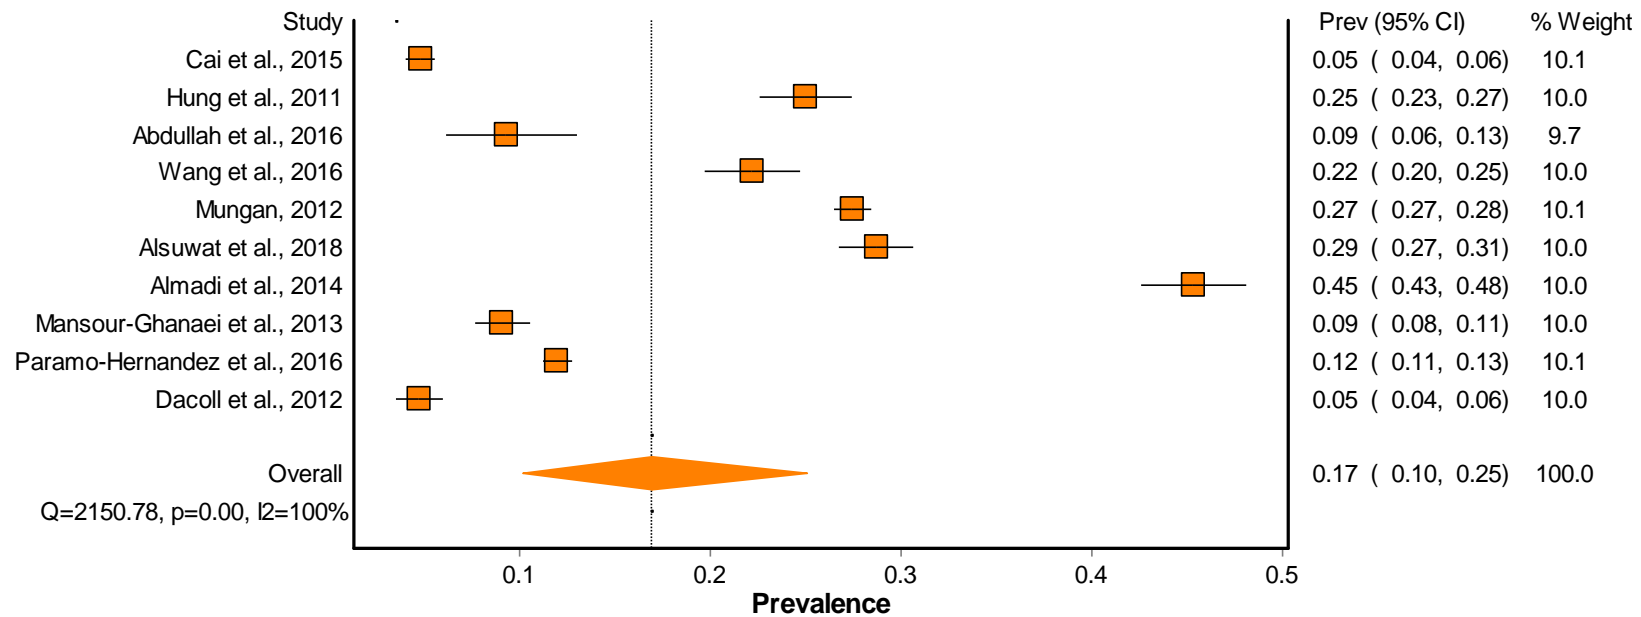

**Figure S46.** Forest plot showing global prevalence of GORD according to studies using the GERDQ instrument to diagnose GORD with studies pooled using a random effects model.

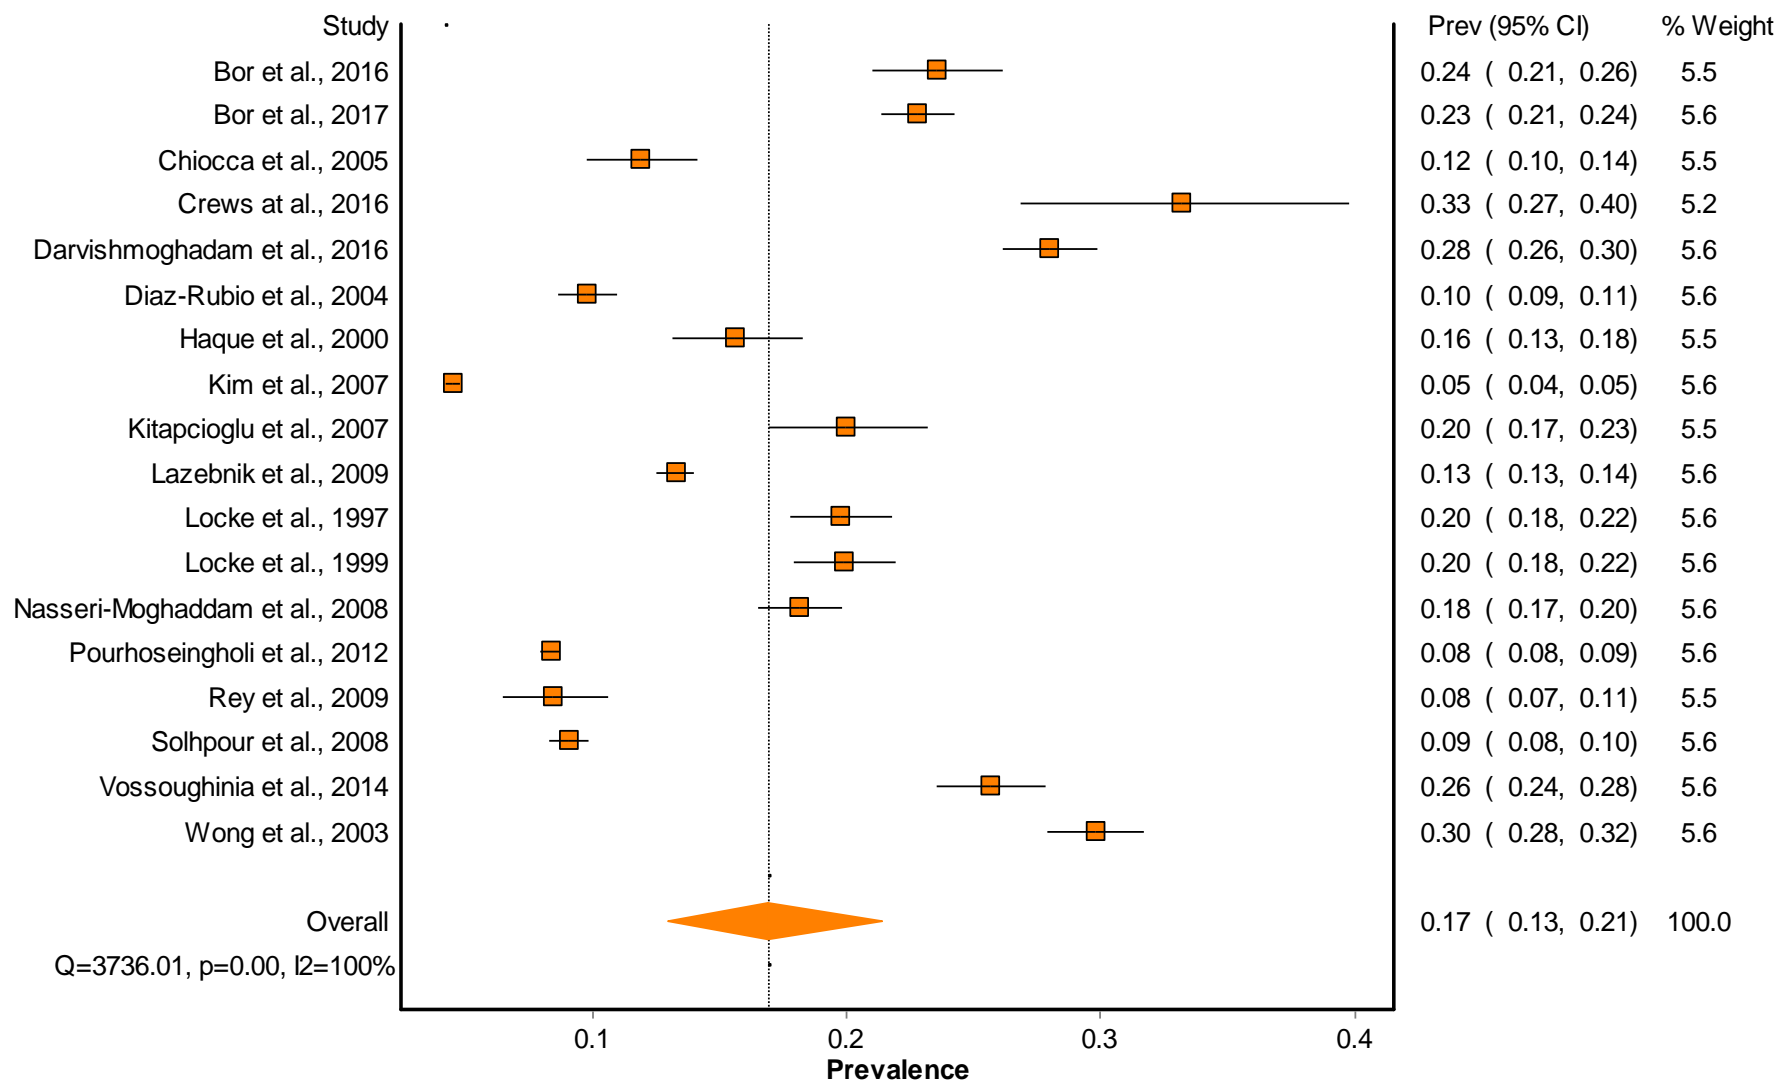

**Figure S47.** Forest plot showing global prevalence of GORD according to studies using the Mayo Reflux Questionnaire to diagnose GORD with studies pooled using a random effects model.

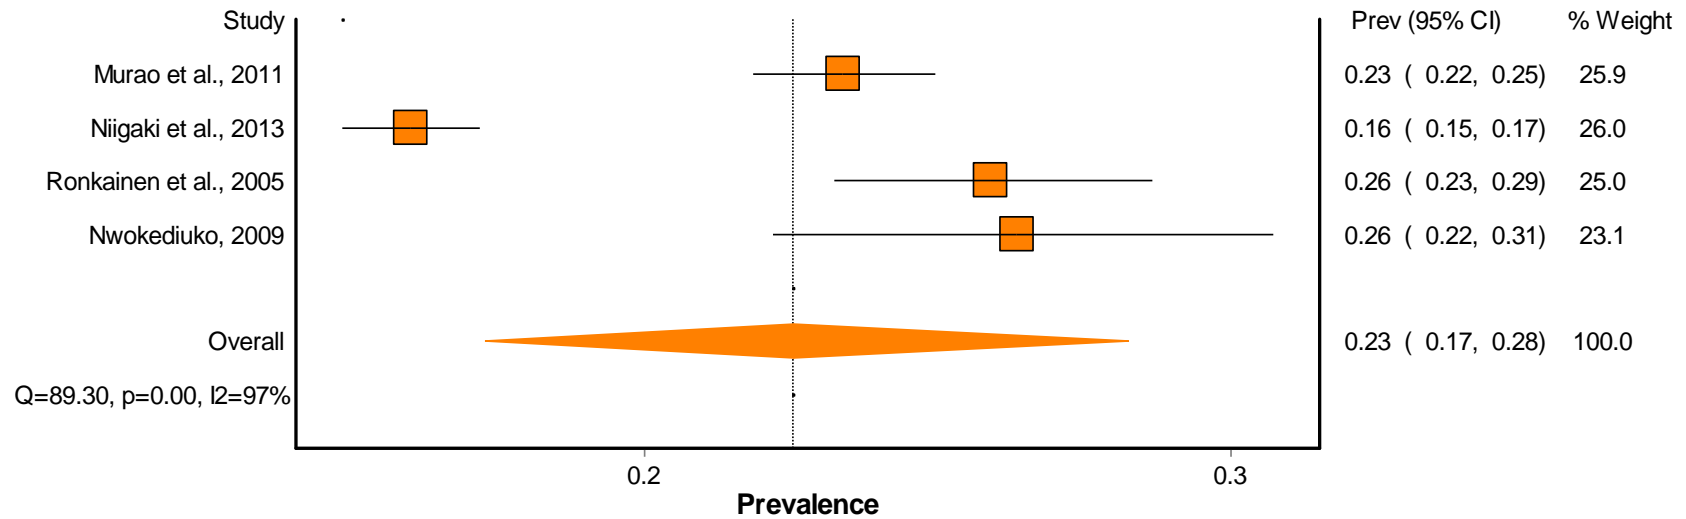

**Figure S48.** Forest plot showing global prevalence of GORD according to studies using the QUEST instrument to diagnose GORD with studies pooled using a random effects model.

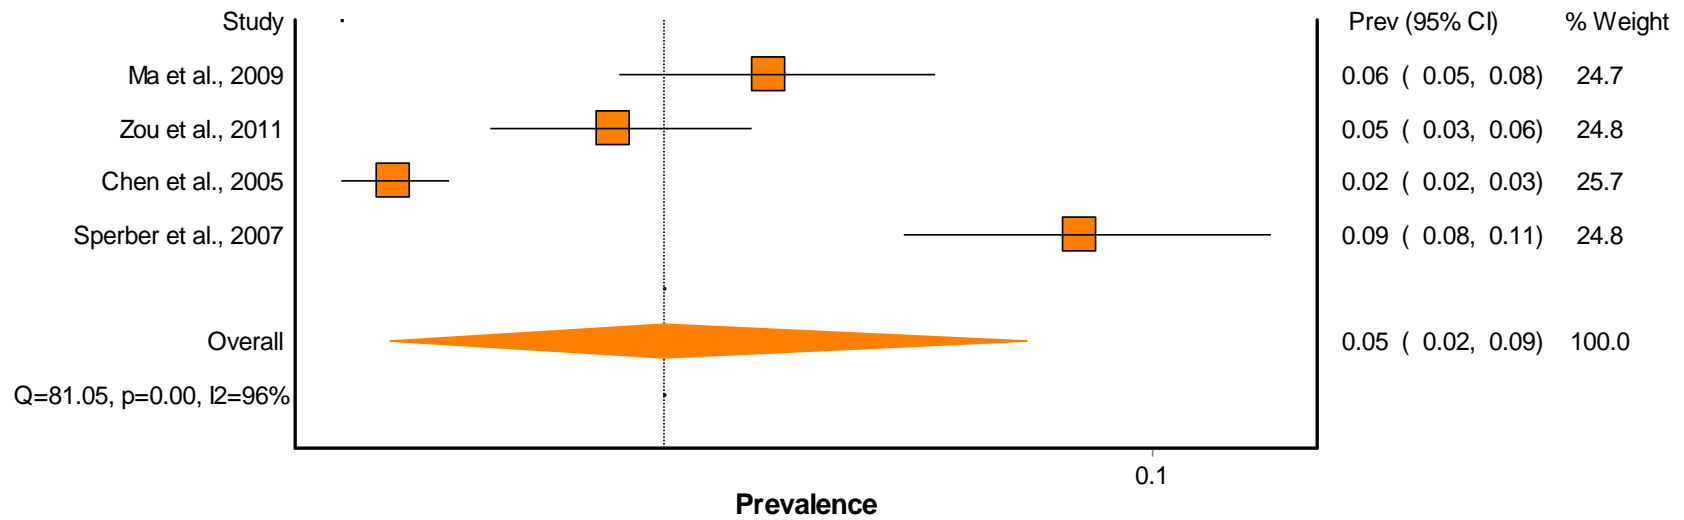

**Figure S49.** Forest plot showing global prevalence of GORD according to studies using the RDQ instrument to diagnose GORD with studies pooled using a random effects model.

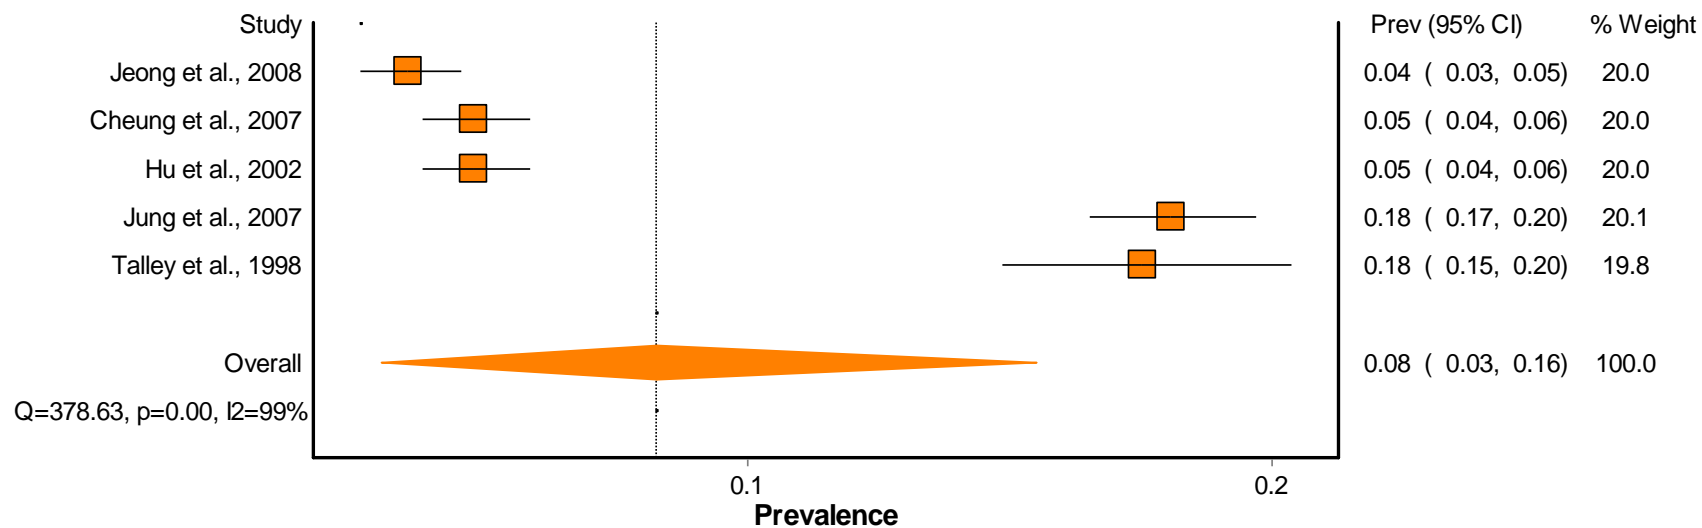

**Figure S50.** Forest plot showing global prevalence of GORD according to studies using the BDQ instrument to diagnose GORD with studies pooled using a random effects model.

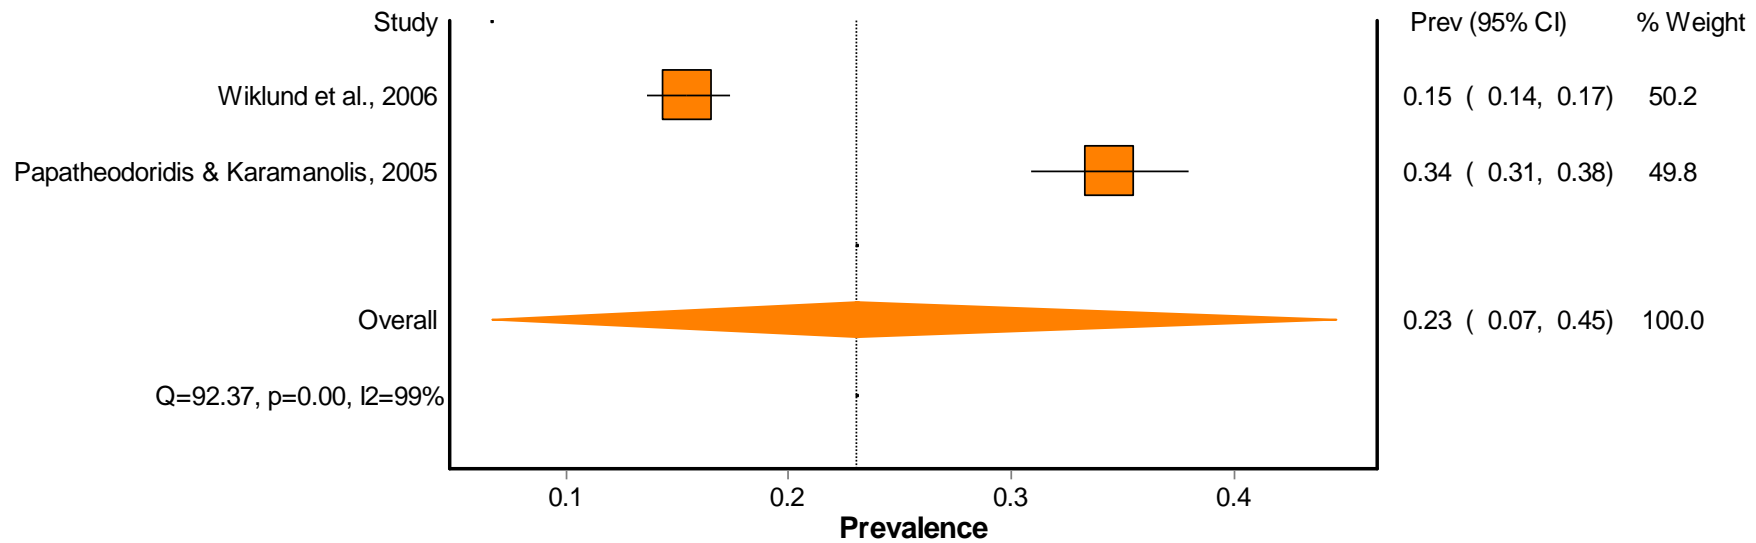

**Figure S51.** Forest plot showing global prevalence of GORD according to studies using the GSRS instrument to diagnose GORD with studies pooled using a random effects model.

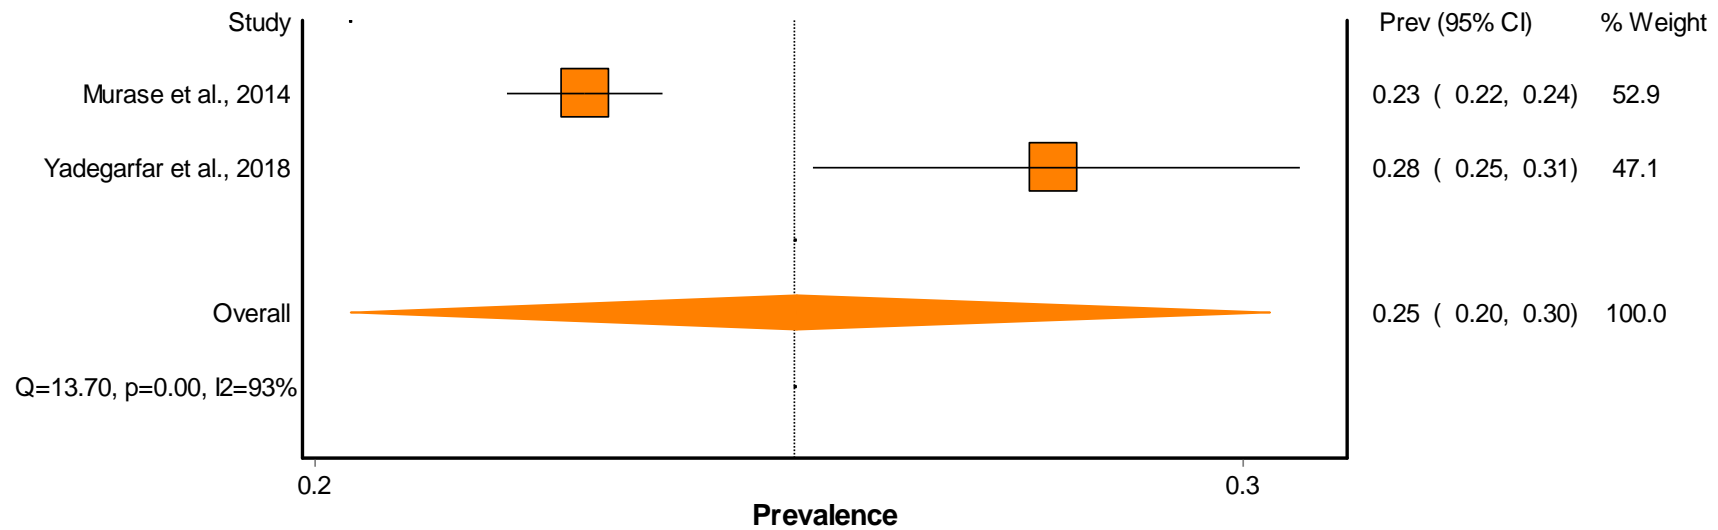

**Figure S52.** Forest plot showing global prevalence of GORD according to studies using the FSSG instrument to diagnose GORD with studies pooled using a random effects model.

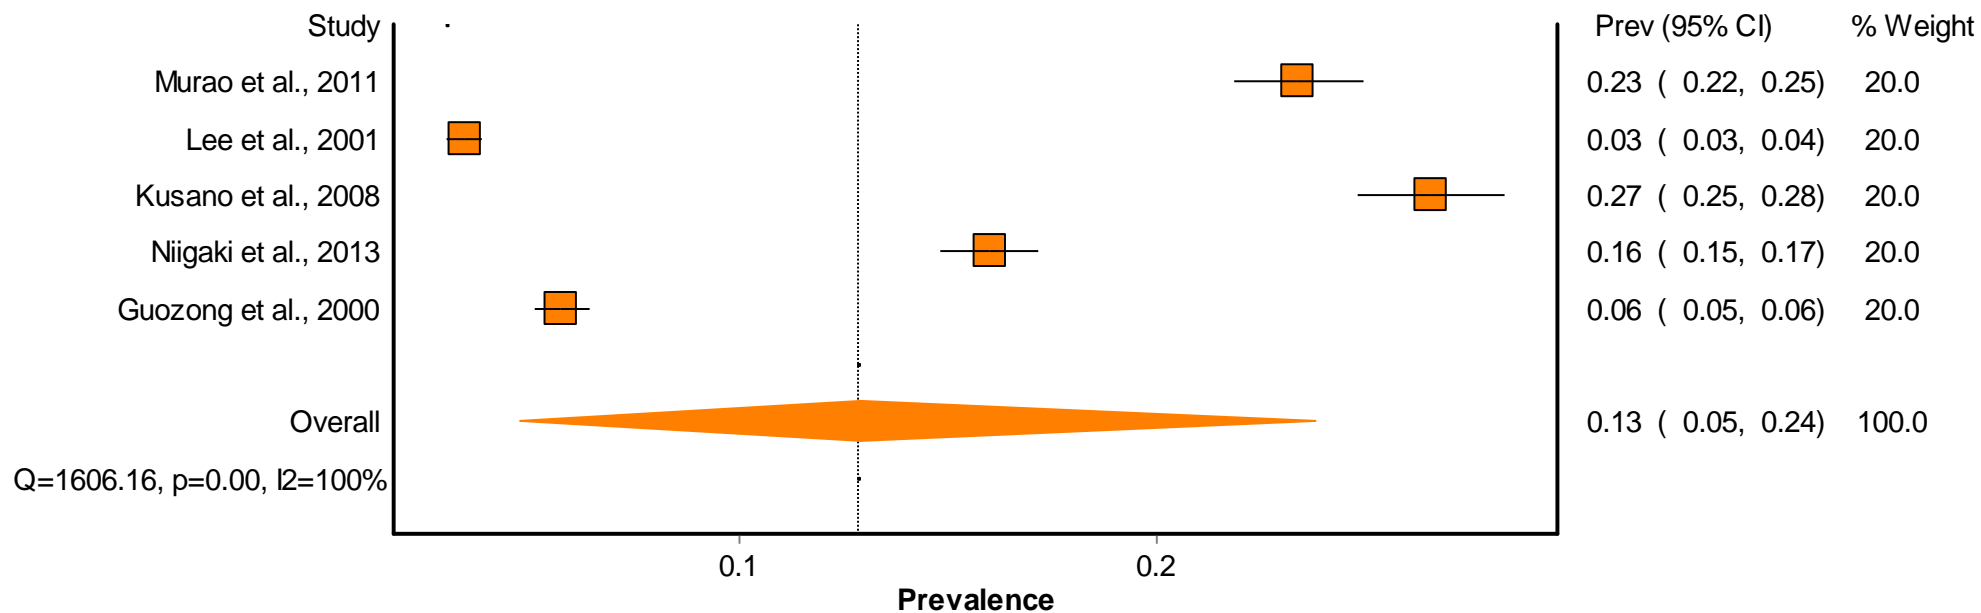

**Figure S53.** Forest plot showing global prevalence of GORD according to studies using endoscopy to diagnose GORD with studies pooled using a random effects model.



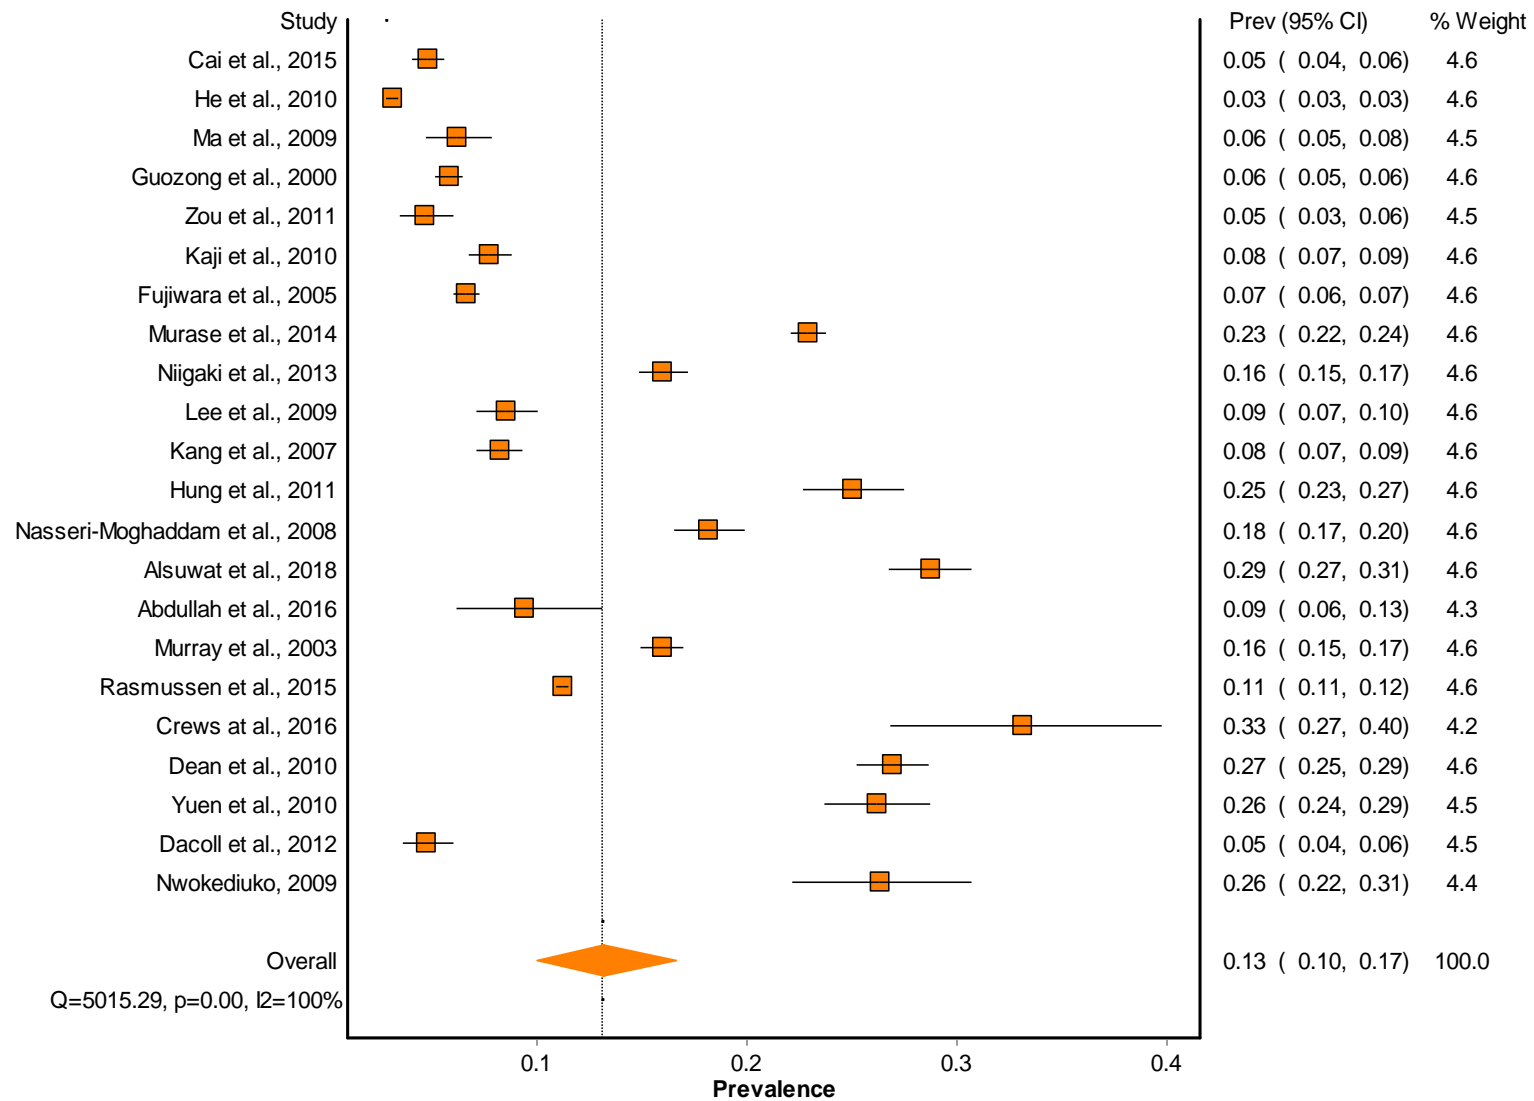

**Figure S54.** Forest plot showing global prevalence of GORD according to studies using self-completed questionnaires to collect data from subjects for the diagnosis GORD with studies pooled using a random effects model.

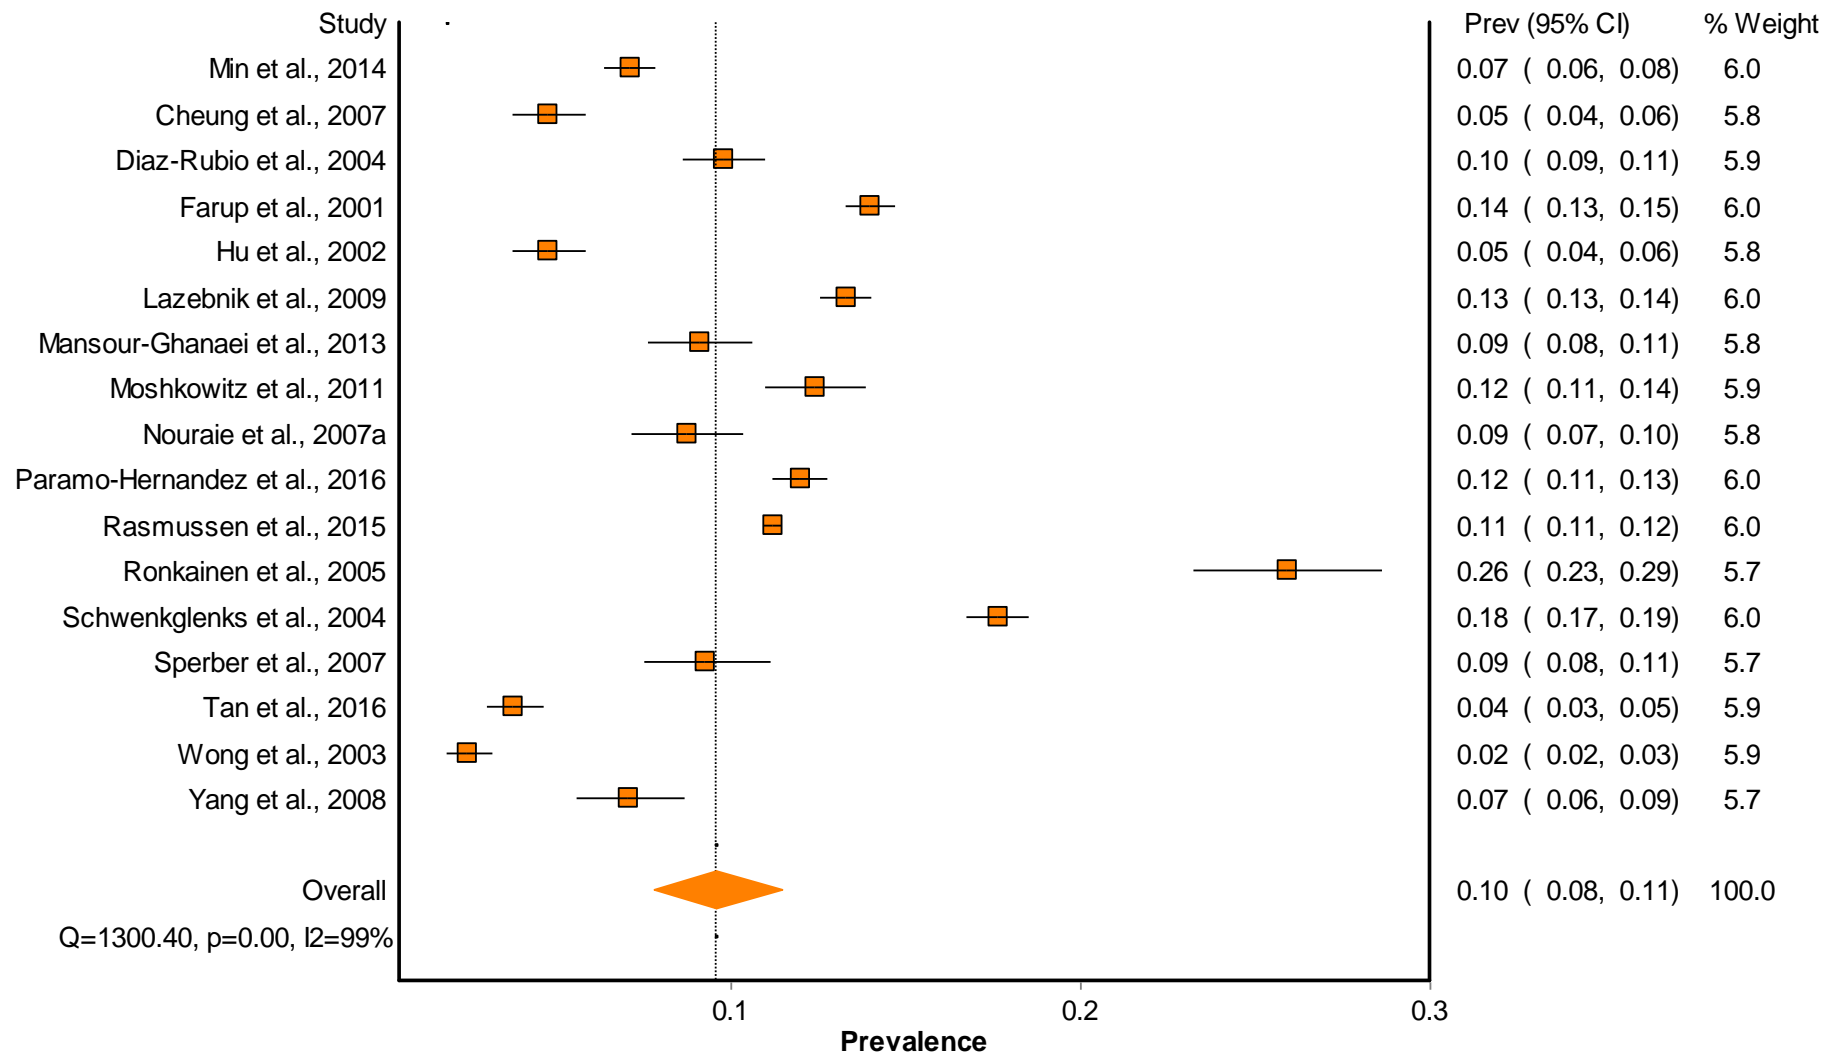

**Figure S55.** Forest plot showing global prevalence of GORD according to studies using telephone interviews to collect data from subjects for the diagnosis GORD with studies pooled using a random effects model.

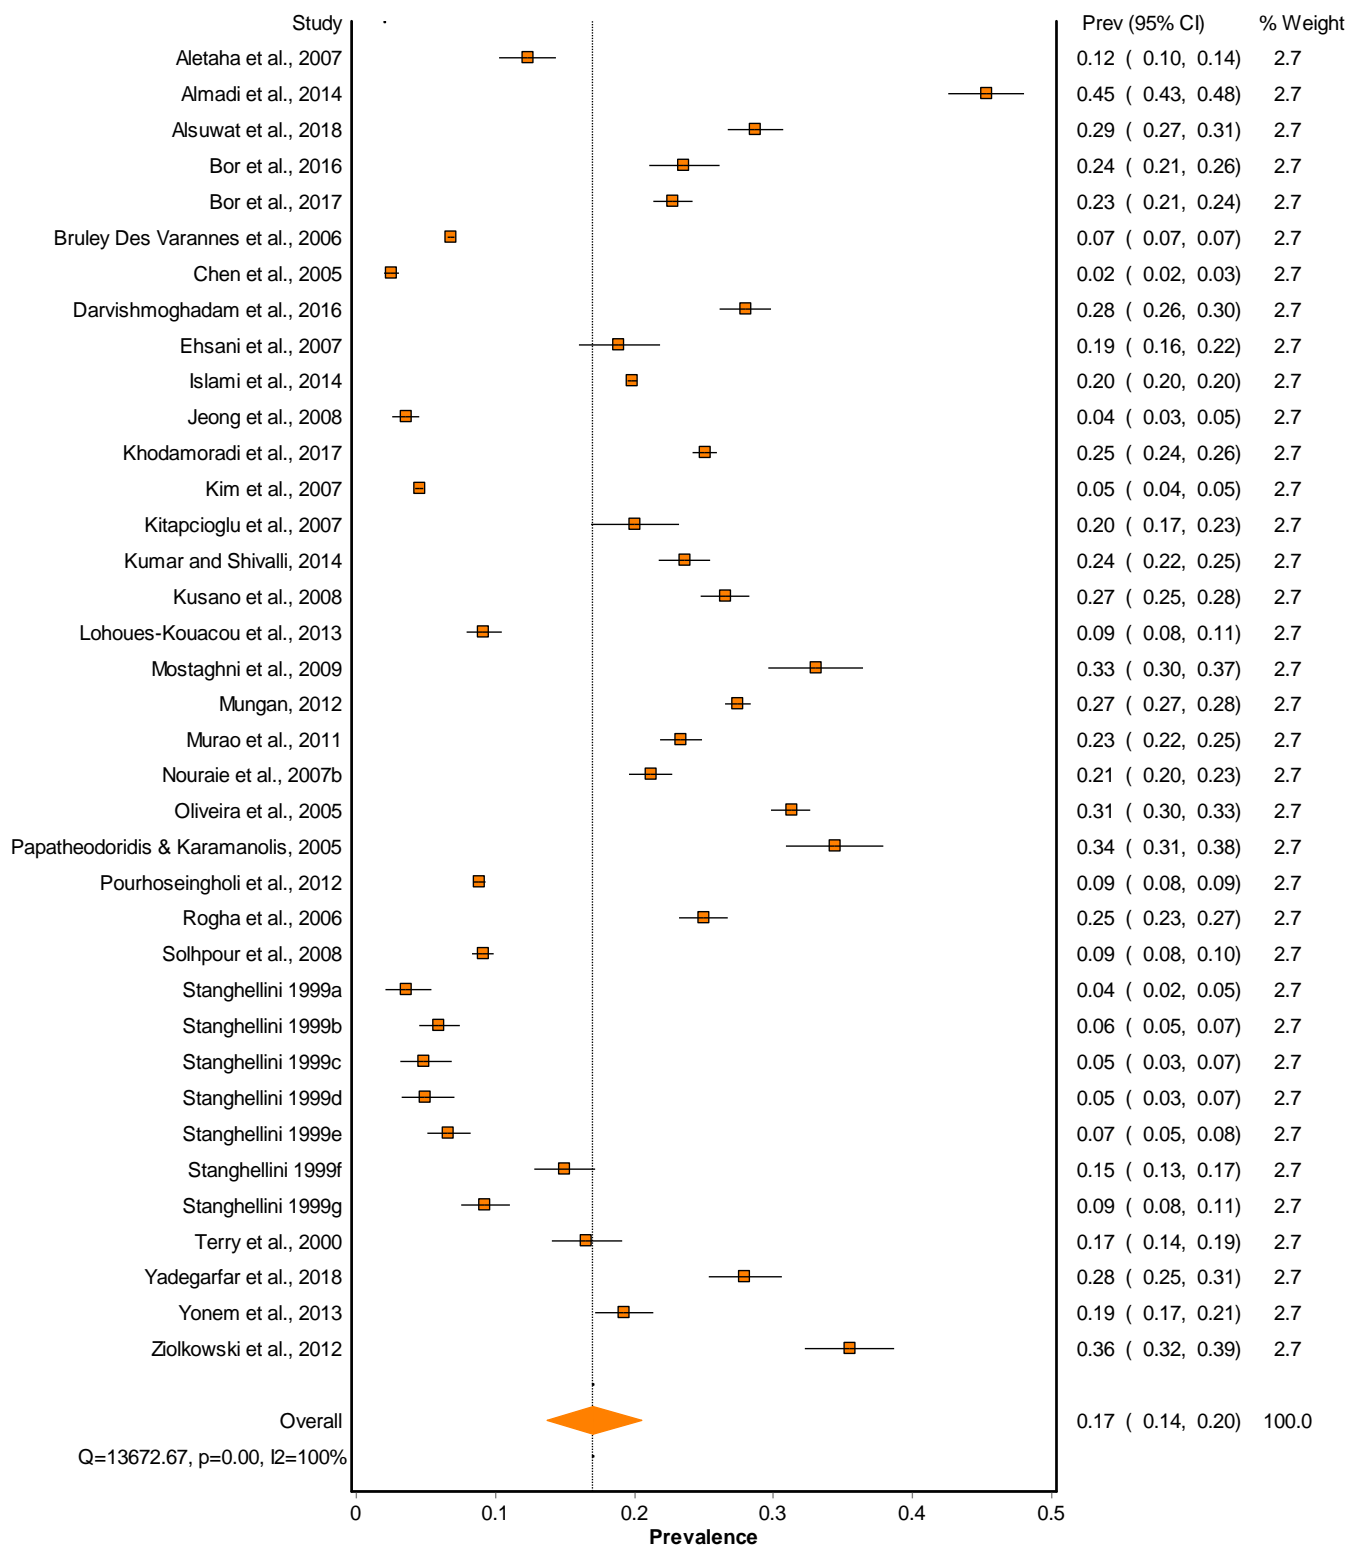

**Figure S56.** Forest plot showing global prevalence of GORD according to studies using face-to-face interviews to collect data from subjects for the diagnosis GORD with studies pooled using a random effects model.

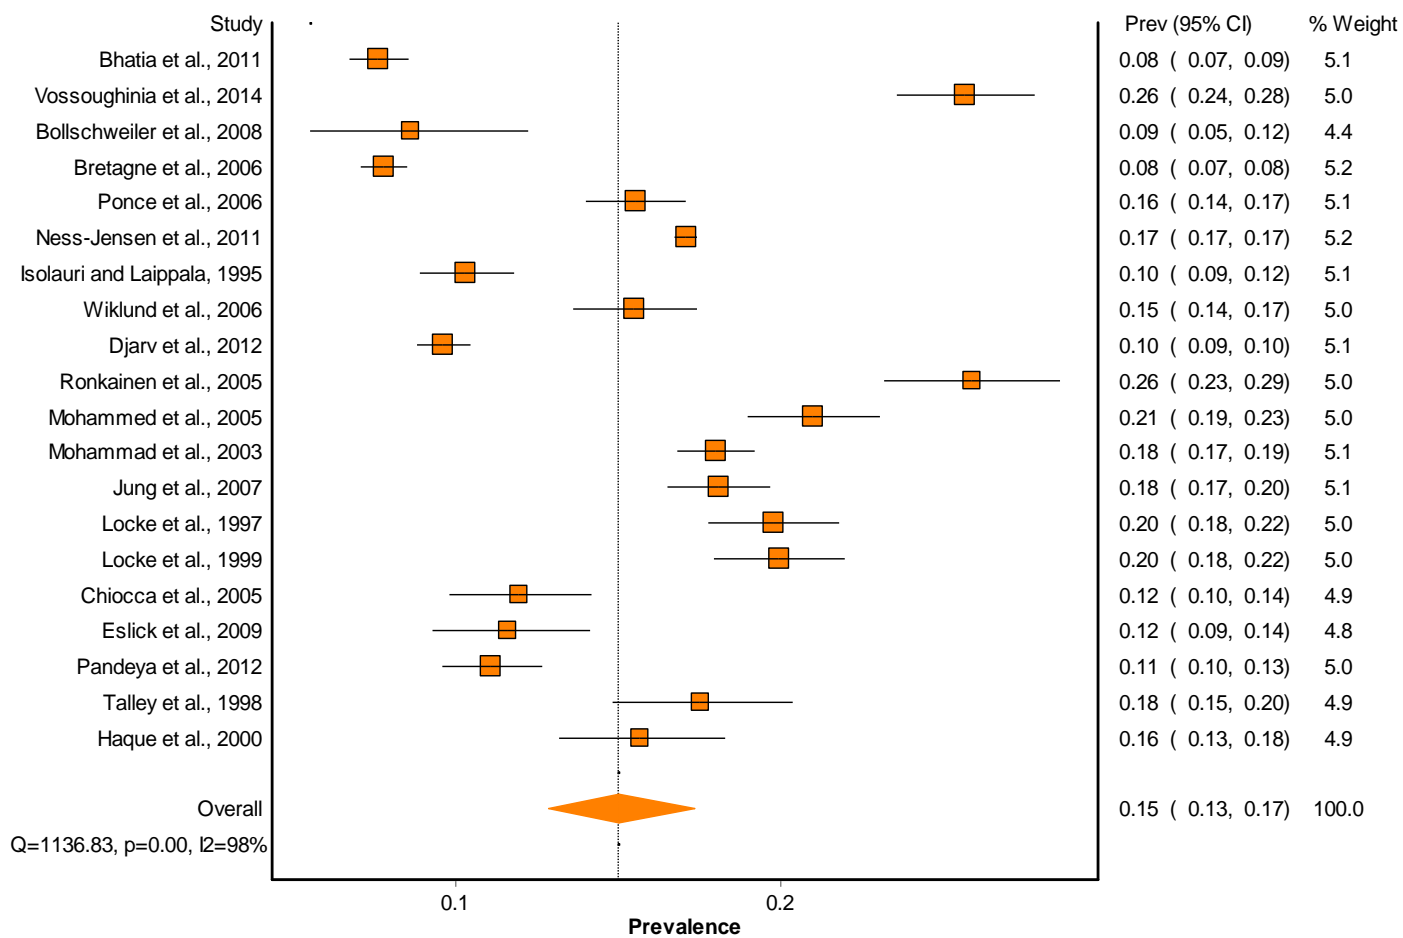

**Figure S57.** Forest plot showing global prevalence of GORD according to studies using postal questionnaires to collect data from subjects for the diagnosis GORD with studies pooled using a random effects model.

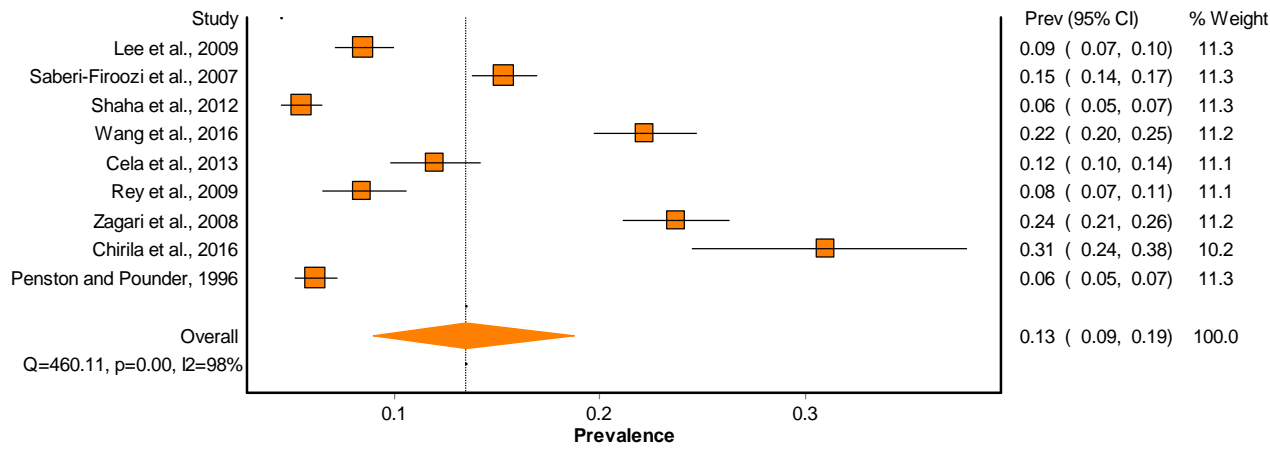

**Figure S58.** Forest plot showing global prevalence of GORD according to studies using interview-administered questionnaires to collect data from subjects for the diagnosis GORD with studies pooled using a random effects model.
